# Supplementary material for: Generation of α-phosphonovinyl radicals and development of a new route to highly functionalized vinylphosphonates and vinylphosphonate-incorporated carbocyclic or heterocyclic compounds via a radical trapping sequence
Source: Royal Society of Chemistry journal article supplement (doi:10.1039/b416394j), 2005-01-01
Supplement: b416394j.pdf [file b416394j.pdf]

**Generation of  $\alpha$ -phosphonovinyl radicals and development of a new route to highly functionalized vinylphosphonates and vinylphosphonate-incorporated carbocyclic or heterocyclic compounds via a radical trapping sequence<sup>†</sup>**

**Takafumi Ageo<sup>a</sup>, Tatsuo Okauchi<sup>a</sup>, Toru Minami<sup>a\*</sup> and Masaru Ishida<sup>b\*</sup>**

*<sup>a</sup>Department of Applied Chemistry, Kyushu Institute of Technology, Sensui-cho, Tobata, Kitakyushu 804-8550, Japan, <sup>b</sup>Department of Chemistry, Faculty of Engineering, Gifu University, Yanagido, Gifu, 501-1193, Japan. E-mail: minami@che.kyutech.ac.jp and ishida@apchem.gifu-u.ac.jp*

Table of contents

|               | Experimental | Spectra |
|---------------|--------------|---------|
| <b>1d</b>     | S4           |         |
| <b>1e</b>     | S5           | S17     |
| <b>1f (Z)</b> | S6           | S19     |
| <b>1f (E)</b> | S6           | S21     |
| <b>1g</b>     | S7           | S27     |
| <b>3a</b>     | S8           | S29     |
| <b>3c</b>     | S8           | S31     |
| <b>3d</b>     | S8           | S33     |

|                  |     |     |
|------------------|-----|-----|
| <b>3e</b>        | S9  | S35 |
| <b>3f</b>        | S9  | S37 |
| <b>5e and 6e</b> |     | S39 |
| <b>5f and 6f</b> |     | S43 |
| <b>17</b>        | S9  | S45 |
| <b>11a</b>       | S11 | S51 |
| <b>11b</b>       | S11 | S53 |
| <b>12</b>        | S12 | S55 |
| <b>14</b>        | S13 | S62 |
| <b>15 and 16</b> | S13 | S66 |
| <b>18</b>        |     | S59 |
| <b>21 and 22</b> | S13 | S70 |

#### Calculation

|                 |     |
|-----------------|-----|
| <b>7'e</b>      | S75 |
| <b>7'e/8'e</b>  | S82 |
| <b>7'e/10'e</b> | S84 |
| <b>8'e</b>      | S85 |
| <b>9'e</b>      | S86 |
| <b>10'e</b>     | S87 |

|          |      |
|----------|------|
| 8'e/9'e  | S88  |
| 9'e/10'e | S89  |
| 7'f      | S90  |
| 7'f/8'f  | S104 |
| 7'f/10'f | S106 |
| 8'f      | S107 |
| 9'f      | S108 |
| 10'f     | S109 |
| 8'f/9'f  | S110 |
| 9'f/10'f | S111 |
| 7'g      | S112 |
| 7'g/8'g  | S121 |
| 7'g/10'g | S123 |
| 8'g      | S124 |
| 9'g      | S125 |
| 10'g     | S126 |
| 8'g/9'g  | S127 |
| 9'g/10'g | S128 |

**Materials.** Benzene was distilled from CaH<sub>2</sub>, and acetonitrile was distilled from P<sub>2</sub>O<sub>5</sub> and redistilled from CaH<sub>2</sub>. THF was distilled from sodium benzophenone ketyl in a recycling still. Diisopropylamine (DIA) was refluxed with CaH<sub>2</sub> and then distilled. A commercial solution of *n*-BuLi (1.47 M, 1.57 M, 1.59 M in hexane) were used. The starting materials **1a-c** and diethyl phosphonoacetaldehyde diethyl acetal were prepared according to the established procedures.<sup>1</sup>

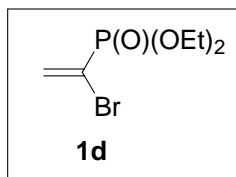

**Diethyl 1-bromovinylphosphonate<sup>2</sup> (1d):** To a solution of Pd(PPh<sub>3</sub>)<sub>4</sub>, generated in situ from Pd(OAc)<sub>2</sub> (17.7 mg, 0.08 mmol) and PPh<sub>3</sub> (83 mg, 0.32 mmol) in benzene (30 mL) at room temperature for 15 min, was added a solution

of diethyl ethynylphosphonate (644 mg, 3.97 mmol) and Bu<sub>3</sub>SnH (1.4 mL, 5.16 mmol) in benzene (10 mL). The reaction mixture was stirred for 10 min. The mixture was quenched by addition of phosphate buffer (pH = 7), and the organic layer was extracted with AcOEt, washed with brine, dried over Na<sub>2</sub>SO<sub>4</sub>, and concentrated *in vacuo*. The residue was chromatographed on silica gel (AcOEt : hexane = 1:1) to give diethyl 1-(tributylstannyl)vinylphosphonate (1.48 g, 82 %); IR (neat) 1241, 1058, 1024, 964, 815 cm<sup>-1</sup>; <sup>1</sup>H NMR δ 1.00 (9H, t, *J* = 7.2 Hz), 1.12 (6H, t, *J* = 8.0 Hz), 1.38-1.44 (12H, m), 1.58-1.65 (6H, m), 4.10-4.18 (4H, m), 6.34 (1H, dd, *J* = 3.3 Hz, <sup>3</sup>*J*<sub>P-H</sub> = 61.2 Hz), 7.00 (1H, dd, <sup>3</sup>*J*<sub>P-H</sub> = 34.5 Hz); <sup>13</sup>C NMR δ 10.3, 13.6, 16.4 (d, <sup>3</sup>*J*<sub>P-C</sub> = 6.0 Hz), 27.3, 28.2, 61.3 (d, <sup>2</sup>*J*<sub>P-C</sub> = 6.0 Hz), 142.7 (d, <sup>1</sup>*J*<sub>P-C</sub> = 131.0 Hz), 144.2 (d, <sup>2</sup>*J*<sub>P-C</sub> = 2.0 Hz); <sup>119</sup>Sn NMR (186 MHz) δ -30.5 - -29.9 (d, *J*<sub>P-Sn</sub> = 111.6 Hz); Anal. Calcd for C<sub>18</sub>H<sub>39</sub>O<sub>3</sub>PSn: C, 47.71; H, 8.67. Found: C, 47.44; H, 8.54. To a cooled solution of diethyl 1-(tributylstannyl)vinylphosphonate (1.04 g, 2.29 mmol) in CCl<sub>4</sub> (10 mL) at -5 °C was added dropwise over 10 min a solution of Br<sub>2</sub> (0.13 mL, 2.52 mmol) in CCl<sub>4</sub> (10 mL), and then the mixture was stirred at this temperature for 45 min. The reaction was quenched by the addition of aqueous Na<sub>2</sub>S<sub>2</sub>O<sub>3</sub> and organic layer was extracted with CH<sub>2</sub>Cl<sub>2</sub>, washed with a saturated water solution of NaCl, dried over Na<sub>2</sub>SO<sub>4</sub>, and concentrated *in vacuo*. The residue was chromatographed on silica gel (AcOEt : hexane = 1:1) to give **1d** as colorless oil. Yield 512 mg (92%). <sup>1</sup>H-NMR δ 1.36-1.40 (6H, m), 4.14-4.20 (4H, m), 6.46

(1H, dd,  $^3J_{P-H} = 37.2$  Hz), 6.91 (1H, dd,  $^3J_{P-H} = 14.4$  Hz);  $^{13}C$ -NMR  $\delta$  16.0 (d,  $^3J_{P-C} = 6.2$  Hz), 63.2 (d,  $^2J_{P-C} = 5.4$  Hz), 119.2 (d,  $^1J_{P-C} = 200.0$  Hz), 135.3 (d,  $^2J_{P-C} = 13.9$  Hz).

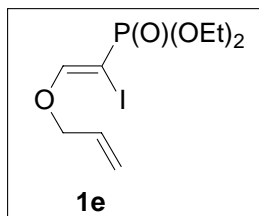

**Diethyl (Z)-2-allyloxy-1-(iodo)-vinylphosphonate (1e):** To a solution of diethyl phosphonoacetaldehyde diethyl acetal (6.65 g, 26.16 mmol) in benzene (10 mL) was added allyl alcohol (3.9 mL, 57.55 mmol) and TsOH (450 mg, 0.26 mmol), and the reaction mixture was heated at reflux with stirring until

benzene-ethanol azeotrope was completely removed (34.5h). The reaction mixture was cooled to room temperature, and then distilled under reduced pressure to give diethyl phosphonoacetaldehyde diallyl acetal as colorless oil. Yield 5.62 g (77 %). Bp 120 / 4 mmHg;  $^1H$ -NMR  $\delta$  1.18 (6H, t,  $J = 7.1$  Hz), 2.10 (2H, dd,  $^2J_{P-H} = 18.7$  Hz,  $J = 5.8$  Hz), 3.93-4.00  $\{[(OCH_2CHCH_2)_2, 4H, m], [P(OCH_2CH_3)_2, 4H, m]\}$ , 4.88 (1H, m), 5.02-5.05 (2H, m), 5.14-5.19 (2H, m), 5.74-5.81 (2H, m);  $^{13}C$ -NMR  $\delta$  16.1 (d,  $^3J_{P-C} = 6.3$  Hz), 31.4 (d,  $^1J_{P-C} = 139.5$  Hz), 61.5 (d,  $^2J_{P-C} = 6.2$  Hz), 97.4, 116.8, 133.9. To a solution of diethylphosphonoacetaldehyde diallyl acetal (139 mg, 0.5 mmol) in THF (1.0 mL) at -78 was added *n*-BuLi (1.59 M in hexane, 0.31 mL, 0.5 mmol). The reaction mixture was stirred at -78 for 1.0 h, and at room temperature overnight. The reaction was quenched by the addition of phosphate buffer (pH = 7). After similar workup, the residue was chromatographed on silica gel (AcOEt : hexane = 1:1) to give (*E*)-2-allyloxy-vinylphosphonate. Yield 110 mg (quant. yield).  $^1H$ -NMR  $\delta$  1.33 (6H, t,  $J = 7.1$  Hz), 4.02-4.10 (4H, m), 4.38 (2H, d,  $J = 5.5$  Hz), 4.77 (1H, dd,  $^2J_{P-H} = 9.7$  Hz,  $J = 13.6$  Hz), 5.28-5.32 (1H, m), 5.34-5.38 (1H, m), 5.90-5.94 (1H, m), 7.21 (1H, dd,  $^3J_{P-H} = 11.5$  Hz,  $J = 13.5$  Hz);  $^{13}C$ -NMR  $\delta$  16.3 (d,  $^3J_{P-C} = 6.7$  Hz), 61.4 (d,  $^2J_{P-C} = 5.2$  Hz), 71.1, 88.9 (d,  $^1J_{P-C} = 199.2$  Hz), 118.8, 131.6, 162.7 (d,  $^2J_{P-C} = 21.2$  Hz); Anal. Calcd for  $C_9H_{17}O_4P$ : C, 49.09; H, 7.78. Found: C, 48.86; H, 7.87. To a solution of LDA (0.72 mmol) in THF (2.5 mL) at -78 was added dropwise a solution of (*E*)-2-allyloxy-vinylphosphonate (132 mg, 0.6 mmol) in THF (0.5 mL), and the mixture was stirred for 50 min. Then, CuBrSMe<sub>2</sub> (62 mg, 0.3 mmol) was added to the mixture. After stirring for 45 min at -78, a solution of I<sub>2</sub> (168 mg, 0.66 mmol) in THF (1.5 mL) was added dropwise to the mixture and the reaction mixture

was stirred for 3 h. The reaction was quenched by the addition of aqueous Na<sub>2</sub>S<sub>2</sub>O<sub>3</sub>. After similar workup, the residue was chromatographed on silica gel (AcOEt) to give **1e** as yellow oil. Yield 153 mg (74 %). <sup>1</sup>H-NMR δ 1.33-1.39 (6H, m), 4.04-4.12 (4H, m), 4.62-4.65 (2H, m), 5.32-5.41 (2H, m), 5.91-5.96 (1H, m), 7.38 (1H, d, <sup>3</sup>J<sub>P-H</sub> = 7.6 Hz); <sup>13</sup>C-NMR δ 16.0 (d, <sup>3</sup>J<sub>P-C</sub> = 6.6 Hz), 56.1 (d, <sup>1</sup>J<sub>P-C</sub> = 204.4 Hz), 62.4 (d, <sup>2</sup>J<sub>P-C</sub> = 4.7 Hz), 74.8, 119.4, 131.7, 163.6 (d, <sup>2</sup>J<sub>P-C</sub> = 31.3 Hz); MS *m/z* 346 (M<sup>+</sup>); HRMS(M<sup>+</sup>) Calcd for C<sub>9</sub>H<sub>16</sub>IO<sub>4</sub>P 345.9831, Found 345.9835.

**Diethyl 1-bromo-hexa-1,5-dienylphosphonate (1f):** To a solution of LDA (6.27 mmol) in THF (15 mL) at -78 °C was added dropwise a solution of tetraethyl methylenediphosphonate (821 mg, 2.85 mmol) in THF (3 mL), and the mixture was warmed to room temperature. *N*-bromosuccinimide (559 mg, 3.14 mmol) was added to the deep yellow mixture at room temperature, and the mixture was stirred for 15 min. After the mixture was cooled to -78 °C, a solution of 4-pentenal (239 mg, 2.85 mmol) in THF (3 mL) was added to the mixture. The reaction mixture was immediately warmed to room temperature with protecting from light and was stirred for 20 h. The reaction was quenched by the addition of saturated aqueous NH<sub>4</sub>Cl. After similar workup, the residue was chromatographed on silica gel (AcOEt : hexane = 1:1) to give (*Z*)-**1f** (444 mg, 53 %) and (*E*)-**1f** (148 mg, 17 %) as pale yellow oil.

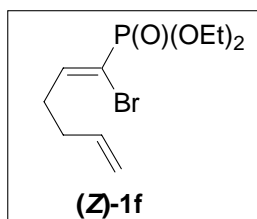

**(Z)-1f:** R<sub>f</sub>0.48 (AcOEt : hexane = 1:1); <sup>1</sup>H-NMR δ 1.33 (6H, t, *J* = 7.1 Hz), 2.20-2.25 (2H, m), 2.39-2.45 (2H, m), 4.03-4.15 (4H, m), 4.98-5.06 (2H, m), 5.72-5.81 (1H, m), 7.10 (1H, td, <sup>3</sup>J<sub>P-H</sub> = 14.2 Hz); <sup>13</sup>C-NMR δ 16.2 (d, <sup>3</sup>J<sub>P-C</sub> = 6.5 Hz), 31.2 (d, <sup>3</sup>J<sub>P-C</sub> = 13.3 Hz), 31.4, 64.0 (d, <sup>2</sup>J<sub>P-C</sub> = 5.2 Hz), 113.0 (d, <sup>1</sup>J<sub>P-C</sub> = 205.5 Hz), 115.8, 136.7, 149.6 (d, <sup>2</sup>J<sub>P-C</sub> = 14.4 Hz); HRMS(M<sup>+</sup>) Calcd for C<sub>10</sub>H<sub>18</sub>BrO<sub>3</sub>P 296.0177, Found 296.0029.

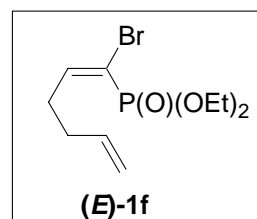

**(E)-1f:** R<sub>f</sub>0.67 (AcOEt : Hexane = 1:1); <sup>1</sup>H-NMR δ 1.33-1.36 (6H, m), 2.14-2.21 (2H, m), 2.66-2.73 (2H, m), 4.08-4.15 (4H, m), 4.98-5.06 (2H, m), 5.74-5.78 (1H, m), 6.90 (1H, td, <sup>3</sup>J<sub>P-H</sub> = 39.5 Hz); <sup>13</sup>C-NMR δ 16.2 (d, <sup>3</sup>J<sub>P-C</sub> = 6.7 Hz), 30.6 (d, <sup>3</sup>J<sub>P-C</sub> = 3.2 Hz), 32.8 (d, <sup>4</sup>J<sub>P-C</sub> = 1.4 Hz), 62.9 (d, <sup>2</sup>J<sub>P-C</sub> = 5.4 Hz), 109.3 (d, <sup>1</sup>J<sub>P-C</sub>

= 197.7 Hz), 115.9, 136.8, 153.9 (d,  $^2J_{P-C} = 16.2$  Hz); HRMS( $M^+$ ) Calcd for  $C_{10}H_{18}BrO_3P$  296.0177, Found 296.0141.

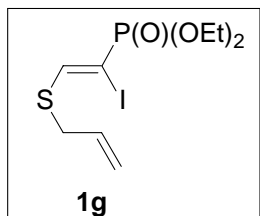

**Synthesis of Diethyl (Z)-2-allylthio-1-iodovinylphosphonate (1g) from**

**Diethyl (E)-2-ethoxy-1-(trimethylsilyl)vinylphosphonate.**

A solution of lithium allylthiolate, generated in situ from allylthiol (381 mg, 3.6 mmol) in THF (18 mL) and *n*-BuLi (3.6 mmol) at  $-78$  °C, was added dropwise to a

solution of diethyl (*E*)-2-ethoxy-1-(trimethylsilyl)vinylphosphonate (841 mg, 3.0 mmol) in THF (12 mL) *via cannula*. After being stirred for 10 min at this temperature, the mixture was then warmed to room temperature and stirred for 7.0 h. After similar workup, the residue was chromatographed on silica gel (AcOEt : hexane = 1:1) to give (*E*)- and (*Z*)-2-allylthio-1-(trimethylsilyl)vinylphosphonates in 438 mg (47 %) and 122 mg (13 %) yields, respectively, as colorless oil. (***E***-isomer:  $R_f$ 0.53 (AcOEt);  $^1H$ -NMR  $\delta$  0.27 (9H, s) 1.30 (6H, t,  $J = 7.0$  Hz), 3.47 (2H, d,  $J = 7.0$  Hz), 3.99-4.01 (4H, m), 5.17-5.29 (2H, m), 5.82-5.90 (1H, m), 8.02 (1H, d,  $^3J_{P-H} = 31.7$  Hz);  $^{13}C$ -NMR  $\delta$  -0.7, 16.3, 37.8, 61.1 (d,  $^2J_{P-C} = 5.3$  Hz), 118.5, 122.7 (d,  $^1J_{P-C} = 139.0$  Hz), 133.1, 160.4 (d,  $^2J_{P-C} = 15.9$  Hz. (***Z***-isomer:  $R_f$ 0.67 (AcOEt);  $^1H$ -NMR  $\delta$  0.17 (9H, s), 1.31-1.35 (6H, m), 3.39 (2H, d,  $J = 7.1$  Hz), 4.03-4.13 (4H, m), 5.17-5.23 (2H, m), 5.82-5.88 (1H, m), 7.34 (1H, d,  $^3J_{P-H} = 56.0$  Hz);  $^{13}C$ -NMR  $\delta$  -0.6, 16.4, 37.8, 61.1 (d,  $^2J_{P-C} = 5.4$  Hz), 118.1, 124.4 (d,  $^1J_{P-C} = 143.8$  Hz), 133.9, 156.3. To a solution of (***E***-isomer (438 mg, 1.42 mmol) in MeCN (10 mL) at room temperature was added NaI (319 mg, 2.13 mmol) and *N*-chlorosuccinimide (284 mg, 2.13 mmol). The mixture was stirred for 2 days at this temperature. The reaction was quenched by the addition of aqueous  $Na_2S_2O_3$ . After similar workup, the residue was chromatographed on silica gel (AcOEt) to give **1g** as yellow crystal. Yield 413 mg (80 %).  $^1H$ -NMR  $\delta$  1.33-1.37 (6H, m), 3.55 (2H, d,  $J = 7.0$  Hz), 4.04-4.12 (4H, m), 5.19-5.30 (2H, m), 5.81-5.93 (1H, m), 8.09 (1H, d,  $^3J_{P-H} = 14.7$  Hz);  $^{13}C$ -NMR  $\delta$  16.2, 36.3, 62.8 (d,  $^2J_{P-C} = 5.1$  Hz), 78.8 (d,  $^1J_{P-C} = 197.6$  Hz), 119.1, 133.0, 155.8 (d,  $^2J_{P-C} = 18.5$  Hz); MS  $m/z$  362 ( $M^+$ ); HRMS( $M^+$ ) Calcd for  $C_9H_{16}IO_3PS$  361.9602, Found 361.9604.

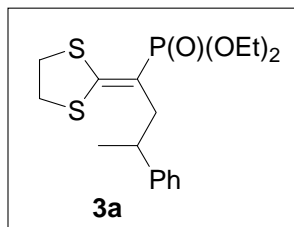

**Diethyl 3-phenyl-1-(1,3-dithiolan-2-ylidene)butylphosphonate (3a):** IR

(neat) 798, 1024, 1240, 1529, 2977, 3448  $\text{cm}^{-1}$ ;  $^1\text{H-NMR}$   $\delta$  1.29-1.34 (9H, m), 2.58-2.72 (2H, m), 3.18-3.22 (1H, m), 3.30-3.36 (2H, m), 3.40-3.42 (2H, m), 3.99-4.13 (4H, m), 7.16-7.20 (1H, m), 7.29-7.31 (4H, m);  $^{13}\text{C-NMR}$   $\delta$  16.3 (d,

$^3J_{\text{P-C}} = 6.2$  Hz), 20.4, 27.8, 36.8, 39.0, 45.2 (d,  $^2J_{\text{P-C}} = 8.7$  Hz), 61.6 (d,  $^2J_{\text{P-C}} = 4.1$  Hz), 112.0 (d,  $^1J_{\text{P-C}} = 187.3$  Hz), 125.9, 127.0, 128.2, 147.1, 158.6 (d,  $^2J_{\text{P-C}} = 14.7$  Hz); MS  $m/z$  372 ( $\text{M}^+$ ); HRMS( $\text{M}^+$ ) Calcd for  $\text{C}_{17}\text{H}_{25}\text{O}_3\text{PS}_2$  372.0983, Found 372.0981.

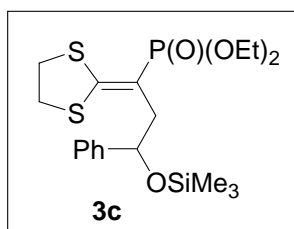

**Diethyl 3-(trimethylsilyloxy)-3-phenyl-1-(1,3-dithiolan-2-ylidene)propylphosphonate (3c):** IR (neat) 750, 840, 964, 1054, 1247, 1529,

2981, 3430  $\text{cm}^{-1}$ ;  $^1\text{H-NMR}$   $\delta$  0.02 (9H, s), 1.32-1.36 (6H, m), 2.61-2.87 (2H, m), 3.16-3.28 (1H, m), 3.27-3.31 (1H, m), 3.36-3.39 (2H, m), 4.05-4.15 (4H,

m), 4.99 (1H, m), 7.19-7.22 (m, 1H), 7.27-7.30 (2H, m), 7.36-7.38 (2H, m);  $^{13}\text{C-NMR}$   $\delta$  0.02, 16.4 (d,  $^3J_{\text{P-C}} = 4.3$  Hz), 36.7, 38.9, 47.2 (d,  $^2J_{\text{P-C}} = 8.7$  Hz), 61.6 (d,  $^2J_{\text{P-C}} = 5.7$  Hz), 73.7, 109.8 (d,  $^1J_{\text{P-C}} = 189.8$  Hz), 125.8, 126.8, 127.9, 145.0, 160.5 (d,  $^2J_{\text{P-C}} = 14.8$  Hz); HRMS( $\text{M}^+$ -  $\text{C}_{10}\text{H}_{15}\text{OSi}$ ) Calcd for  $\text{C}_9\text{H}_{16}\text{O}_3\text{PS}_2$  267.0278, Found 267.0319; ( $\text{M}^+$ -  $\text{C}_9\text{H}_{16}\text{O}_3\text{PS}_2$ ) Calcd for  $\text{C}_{10}\text{H}_{15}\text{OSi}$  179.0892, Found 179.0875.

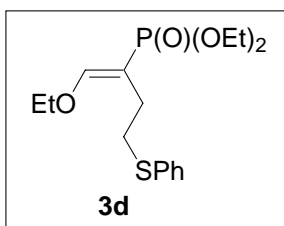

**Diethyl (E)-2-ethoxy-1-(2'-phenylthioethyl)-vinylphosphonate (3d):** IR

(neat) 742, 794, 1024, 1637, 2981, 3448  $\text{cm}^{-1}$ ;  $^1\text{H-NMR}$   $\delta$  1.29-1.33 (9H, m), 2.42-2.51 (2H, m), 2.99-3.03 (2H, m), 4.00-4.10 (6H, m), 7.04 (1H, m,  $^3J_{\text{P-H}} = 10.5$  Hz), 7.15 (1H, t,  $J = 7.5$  Hz), 7.25-7.29 (2H, t,  $J = 8.4$  Hz), 7.35-7.37 (2H,

d,  $J = 7.9$  Hz);  $^{13}\text{C-NMR}$   $\delta$  15.3, 16.3 (d,  $^3J_{\text{P-C}} = 6.5$  Hz), 24.5, 30.9, 61.3 (d,  $^2J_{\text{P-C}} = 5.2$  Hz), 69.8, 101.8 (d,  $^1J_{\text{P-C}} = 194.6$  Hz), 125.3, 128.1, 128.7, 136.6, 159.6 (d,  $^2J_{\text{P-C}} = 28.8$  Hz); HRMS( $\text{M}^+$ ) Calcd for  $\text{C}_{16}\text{H}_{25}\text{O}_4\text{PS}$  344.1211, Found 344.1198.



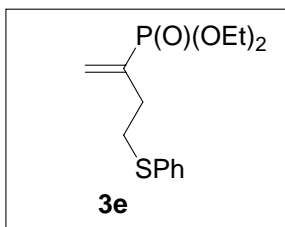

**Diethyl 1-(2'-phenylthioethyl)-vinylphosphonate (3e):** IR (neat) 798, 1022, 1259, 1438, 1583, 2967, 3455  $\text{cm}^{-1}$ ;  $^1\text{H-NMR}$   $\delta$  1.31 (6H, t), 2.54-2.61 (2H, m), 3.10-3.14 (2H, m), 4.03-4.12 (4H, m), 5.82 (1H, dd,  $^3J_{\text{H-P}} = 47.9$  Hz,  $J = 1.4$  Hz), 6.11 (1H, dd,  $^3J_{\text{H-P}} = 22.5$  Hz,  $J = 0.5$  Hz), 7.19 (1H, m), 7.27-7.31 (4H, m);  $^{13}\text{C-NMR}$   $\delta$  16.3 (d,  $^3J_{\text{P-C}} = 6.4$  Hz), 32.1 (d,  $^3J_{\text{P-C}} = 4.5$  Hz), 32.5 (d,  $^2J_{\text{P-C}} = 11.3$  Hz), 62.0 (d,  $^2J_{\text{P-C}} = 5.8$  Hz), 126.0, 128.4 (d,  $^1J_{\text{P-C}} = 164.5$  Hz), 128.9, 129.2, 131.0 (d,  $^2J_{\text{P-C}} = 9.3$  Hz), 133.0; HRMS( $\text{M}^+$ ) Calcd for  $\text{C}_{14}\text{H}_{21}\text{O}_3\text{PS}$  300.0949, Found 300.0950.

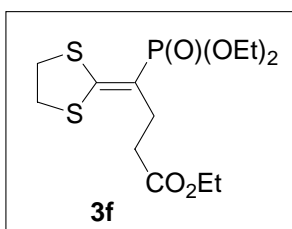

**Ethyl 4-(diethylphosphono)-4-(1,3-dithiolan-2-ylidene)butyrate (3f):**  $^1\text{H-NMR}$   $\delta$  1.21-1.26 (3H, m), 1.30 (6H, t,  $J = 7.2$  Hz), 2.48-2.53 (2H, m), 2.63-2.71 (2H, m), 3.34-3.36 (2H, m), 3.38-3.39 (2H, m), 4.01-4.13 [(P(O)(OCH<sub>2</sub>CH<sub>3</sub>)<sub>2</sub>, 4H, m), (CO<sub>2</sub>CH<sub>2</sub>CH<sub>3</sub>, 2H, m)];  $^{13}\text{C-NMR}$   $\delta$  14.2, 16.3 (d,  $^3J_{\text{P-C}} = 6.5$  Hz), 30.7 (d,  $^2J_{\text{P-C}} = 8.1$  Hz), 32.3, 36.9, 39.1, 60.4, 61.7 (d,  $^2J_{\text{P-C}} = 5.2$  Hz), 110.3 (d,  $^1J_{\text{P-C}} = 189.2$  Hz), 159.2 (d,  $^2J_{\text{P-C}} = 15.2$  Hz), 172.8; HRMS( $\text{M}^+$ ) Calcd for  $\text{C}_{13}\text{H}_{23}\text{O}_5\text{PS}_2$  354.0725, Found 354.0738.

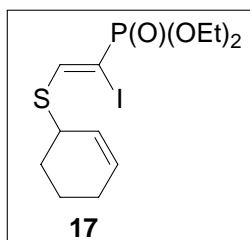

**Diethyl (Z)-2-cyclohexenylthio-1-iodovinylphosphonate (17):** The reaction of lithium 2-cyclohexene-1-thiolate (4.46 mmol) with diethyl (*E*)-2-ethoxy-1-(trimethylsilyl)vinylphosphonate (1.04 g, 3.72 mmol) was carried out following procedures described above to give (*E*)- and (*Z*)-2-cyclohexenylthio-1-(trimethylsilyl)vinylphosphonates in 596 mg (46 %) and 216 mg (17 %) yields, respectively, as colorless oil. (***E***)-**isomer**:  $R_f$  0.53 (AcOEt);  $^1\text{H-NMR}$   $\delta$  0.27 (9H, s) 1.31 (6H, t,  $J = 7.1$  Hz), 1.50-1.59 (1H, m), 1.75-1.90 (2H, m), 2.02-2.07 (3H, m), 3.74-3.75 (1H, m), 3.99-4.06 (4H, m), 5.69-5.73 (1H, m), 5.88-5.92 (1H, m), 8.22 (1H, d,  $^3J_{\text{P-H}} = 31.7$  Hz);  $^{13}\text{C-NMR}$   $\delta$  -0.7, 16.3, 19.1, 24.6, 30.3, 45.1, 61.1 (d,  $^2J_{\text{P-C}} = 5.1$  Hz), 121.9 (d,  $^1J_{\text{P-C}} = 138.6$  Hz), 126.0, 131.6, 160.9; (***Z***)-**isomer**:  $R_f$  0.65 (AcOEt): The (***E***)-**isomer** (552 mg, 1.58 mmol) was treated with NaI (355 mg, 2.37 mmol) and *N*-chlorosuccinimide (317 mg, 2.37 mmol) according to similar procedures described for **1g** to give **17** as yellow crystals. Yield

595 mg (94 %).  $^1\text{H-NMR}$   $\delta$  1.37 (6H, t,  $J = 7.1$  Hz), 1.60-1.71 (1H, m), 1.83-1.89 (3H, m), 2.05-2.11 (2H, m), 3.89-3.90 (1H, m), 4.05-4.15 (4H, m), 5.71-5.74 (1H, m), 5.92-5.95 (1H, m), 8.22 (1H, d,  $^3J_{\text{P-H}} = 14.7$  Hz);  $^{13}\text{C-NMR}$   $\delta$  16.2 (d,  $^3J_{\text{P-C}} = 7.9$  Hz), 19.2, 24.5, 30.6, 43.6, 62.7, 77.8 (d,  $^1J_{\text{P-C}} = 197.9$  Hz), 125.8, 132.3, 156.1; HRMS( $\text{M}^+$ ) Calcd for  $\text{C}_{12}\text{H}_{20}\text{IO}_3\text{PS}$  401.9915, Found 401.9912.

**General procedure for the synthesis of diethyl 2-geranyloxy-1-(trimethylsilyl)-vinylphosphonate and diethyl 2-geranylthio-1-(trimethylsilyl)-vinylphosphonate:** A solution of RLi, generated in situ from RH (R = geranyloxy or geranylthio, 3.6 mmol) in THF (18 mL) and *n*-BuLi (3.6 mmol) at  $-78$  °C for 1.0 h, was added dropwise *via cannula* to a solution of diethyl (*E*)-2-ethoxy-1-(trimethylsilyl)vinylphosphonate (841 mg, 3.0 mmol) in THF (12 mL). After similar workup, the residue was chromatographed on silica gel (AcOEt : hexane = 1:1) to give (*E*)-2-geranyloxy-1-(trimethylsilyl)-vinylphosphonate and a mixture of (*E*)- and (*Z*)-2-geranylthio-1-(trimethylsilyl)-vinylphosphonates, respectively, as colorless oil.

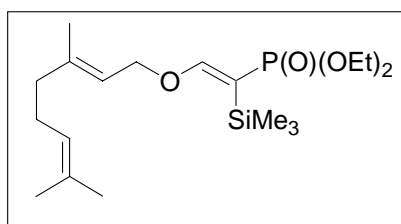

**Diethyl (*E*)-2-geranyloxy-1-(trimethylsilyl)-vinylphosphonate :**

Yield 40 %.  $^1\text{H-NMR}$   $\delta$  0.17 (9H, s), 1.23 (6H, t,  $J = 7.1$  Hz), 1.60 (3H, s), 1.68 (6H, s), 2.03-2.11 (4H, m), 3.95-4.08 (4H, m), 4.48 (2H, d,  $J = 6.9$  Hz), 5.06-5.09 (1H, m), 5.32-5.36 (1H, m), 7.49 (1H, d,  $^3J_{\text{P-H}} = 16.4$  Hz);  $^{13}\text{C-NMR}$   $\delta$  -0.38, 16.2, 16.3 (d,  $^3J_{\text{P-C}} = 7.8$  Hz), 16.5, 25.6, 26.1, 39.4, 60.7 (d,  $^2J_{\text{P-C}} = 5.1$  Hz), 70.3, 98.7 (d,  $^1J_{\text{P-C}} = 155.3$  Hz), 118.8, 123.5 (d,  $^2J_{\text{P-C}} = 13.9$  Hz), 131.8, 142.4, 170.5; HRMS( $\text{M}^+$ ) Calcd for  $\text{C}_{19}\text{H}_{37}\text{O}_4\text{PSi}$  388.2199, Found 388.2183.

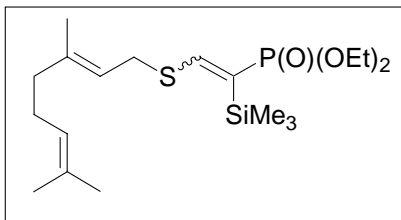

**The mixture of diethyl (*E*)- and (*Z*)- 2-geranylthio-1-**

**(trimethylsilyl)-vinylphosphonate:** Yield 56 % (*E/Z* = 74/26).  $^1\text{H-NMR}$   $\delta$  0.16 (33/100  $\times$  9H, s, for *Z* isomer), 0.26 (9H, s, for *E* isomer), 1.26-1.34 [(6 + 33/100  $\times$  6) H, m, for *Z* isomer and *E* isomer], 1.60 [(3 + 33/100  $\times$  3) H, s, for *Z* isomer and *E* isomer], 1.67 [(3 + 33/100  $\times$  3) H, s, for *Z*

**isomer and E isomer**], 1.71 [(3 + 33/100 × 3) H, s, for **Z isomer** and **E isomer**], 2.04-2.08 [(4 + 33/100 × 4) H, s, for **Z isomer** and **E isomer**], 3.43 (33/100 × 2H, d,  $J = 7.9$  Hz, for **Z isomer**), 3.52 (2H, d,  $J = 7.8$  Hz, for **E isomer**), 3.97-4.09 [(4 + 33/100 × 4) H, m, for **Z isomer** and **E isomer**], 5.07 [(1 + 33/100) H, t, for **Z isomer** and **E isomer**], 5.29 [(1 + 33/100) H, t, for **Z isomer** and **E isomer**], 7.36 (33/100 × 1H, d,  $^3J_{P-H} = 56.3$  Hz, **Z isomer**), 8.08 (1H, dd,  $^3J_{P-H} = 31.8$  Hz, for **E isomer**);  $^{13}\text{C-NMR } \delta$  - 0.75, 16.3, 17.7 (d,  $^3J_{P-C} = 5.3$  Hz), 25.6, 26.4, 26.5, 32.5, 33.0, 39.5, 61.2 (d,  $^2J_{P-C} = 5.5$  Hz), 61.5, 118.6, 118.7, 119.6, 121.7 (d,  $^1J_{P-C} = 141.4$  Hz), 123.7, 131.7, 131.8, 140.2, 140.9; HRMS( $M^+$ ) Calcd for  $\text{C}_{19}\text{H}_{37}\text{O}_3\text{PSSi}$  404.1970, Found 404.1946.

**General procedure for the synthesis of diethyl 2-geranyloxy-1-iodovinylphosphonate (11a) and diethyl 2-geranylthio-1-iodovinylphosphonate (11b):** To a solution of the vinylsilanes (1.16 mmol) prepared above in MeCN (8 mL) at room temperature was added NaI (1.74 mmol) and *N*-chlorosuccinimide (1.74 mmol). The mixture was stirred for 2 days at this temperature. After similar workup, the residue was chromatographed on silica gel (AcOEt) to give **11a,b** and recovered starting materials.

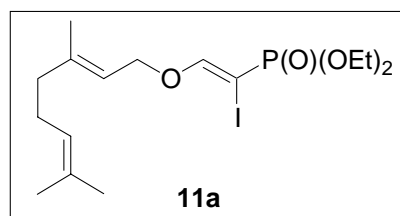

**Diethyl 2-geranyloxy-1-iodovinylphosphonate (11a):** Yield 16 %.

$^1\text{H-NMR } \delta$  1.20-1.23 (6H, m), 1.47 (3H, s), 1.55 (3H, s), 1.59 (3H, s), 1.91-1.98 (4H, m), 3.88-4.00 (4H, m), 4.52 (d,  $J = 7.0$  Hz), 4.94 (1H, t,  $J = 1.4$  Hz), 5.26 (1H, t,  $J = 1.1$  Hz), 7.25 (1H, d,  $^3J_{P-H} = 7.6$  Hz);

$^{13}\text{C-NMR } \delta$  16.2, 16.7, 17.5, 25.6, 26.1, 55.3 (d,  $^1J_{P-C} = 205.9$  Hz), 62.3 (d,  $^2J_{P-C} = 4.8$  Hz), 71.0, 118.1, 123.4, 132.0, 143.7, 163.8;

HRMS( $M^+$ ) Calcd for  $\text{C}_{16}\text{H}_{28}\text{IO}_4\text{P}$  442.0770, Found 442.0820.

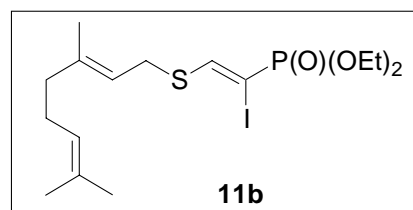

**Diethyl 2-geranylthio-1-iodovinylphosphonate (11b):** Yield 23 %.  $^1\text{H-NMR } \delta$  1.32-1.36 (6H, m), 1.60 (3H, s), 1.68 (3H, s), 1.72 (3H, s), 2.06-2.10 (4H, m), 3.59 (d,  $J = 7.9$  Hz), 4.03-4.12 (4H, m), 5.07 (1H, t), 5.31 (1H, t), 8.13 (1H, d,  $^3J_{P-H} = 14.7$  Hz);  $^{13}\text{C-NMR } \delta$  16.2 (d,  $^3J_{P-C} = 5.0$  Hz), 17.7, 25.6, 26.4,

31.4, 39.5, 62.7 (d,  $^2J_{P-C} = 4.9$  Hz), 77.9 (d,  $^1J_{P-C} = 196.8$  Hz), 118.5, 123.4, 131.9, 141.6, 156.7 (d,  $^2J_{P-C} = 17.4$  Hz); HRMS( $M^+$ ) Calcd for  $C_{16}H_{28}IO_3PS$  458.0542, Found 458.0558.

**Diethyl 1-bromo-4,8-dimethyl-4-vinyl-nona-1,7-dienylphosphonate (12):** This derivative was prepared following similar procedures described for **1f** by using tetraethyl methylenediphosphonate (493 mg, 1.71 mmol), NBS (335 mg, 1.88 mmol) and 3,7-dimethyl-3-vinyl-6-octenal<sup>3</sup> (309 mg, 1.71 mmol) in 224 mg (33 %) yield together with (*E*)-**12** (256 mg, 38 %).

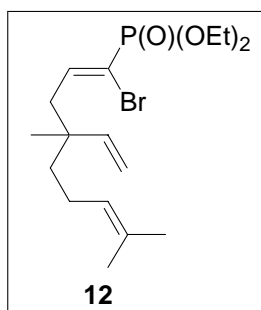

**Diethyl 1-bromo-4,8-dimethyl-4-vinyl-nona-1,7-dienylphosphonate (12):**

$^1H$ -NMR  $\delta$  1.03 (3H, s), 1.31-1.37 (8H, m), 1.56 (3H, s), 1.65 (3H, s), 1.80-1.92 (2H, m), 2.34-2.37 (2H, ddd,  $^4J_{P-H} = 6.9$  Hz,  $J = 3.0$  Hz), 4.04-4.12 (4H, m), 4.94 (1H, dd,  $J = 17.5$  Hz), 5.02-5.05 (2H, m), 5.71 (1H, dd,  $J = 17.5$  Hz), 7.08 (1H, td,  $^3J_{P-H} = 14.4$  Hz);  $^{13}C$ -NMR  $\delta$  16.2 (d,  $^3J_{P-C} = 6.5$  Hz), 17.6, 22.8, 25.6,

40.0, 40.8, 42.8 (d,  $^3J_{P-C} = 12.9$  Hz), 62.9 (d,  $^2J_{P-C} = 5.3$  Hz), 112.9, 114.0 (d,  $^1J_{P-C} = 204.9$  Hz), 124.3, 131.4, 145.3, 147.4 (d,  $^2J_{P-C} = 15.0$  Hz); HRMS( $M^+$ ) Calcd for  $C_{17}H_{30}BrO_3P$  392.1116, Found 392.1077, 394.1048.

**Diethyl (*E*)-1-bromo-4,8-dimethyl-4-vinyl-nona-1,7-dienylphosphonate ((*E*)-12):**  $^1H$ -NMR  $\delta$  1.00 (3H, s), 1.31-1.36 (8H, m), 1.55 (3H, s), 1.64 (3H, m), 1.86-1.89 (2H, m), 2.56-2.59 (1H, m), 2.72-2.78 (1H, m), 4.07-4.15 (4H, m), 4.94 (1H, dd,  $J = 17.5$  Hz), 5.03-5.08 (2H, m), 5.70 (1H, dd,  $J = 17.6$  Hz),

6.88 (1H, td,  $^3J_{P-H} = 39.9$  Hz);  $^{13}C$ -NMR  $\delta$  16.2 (d,  $^3J_{P-C} = 6.6$  Hz), 17.6, 22.2, 22.7, 25.7, 40.0, 40.9, 41.9, 62.8 (d,  $^2J_{P-C} = 3.8$  Hz), 112.0 (d,  $^1J_{P-C} = 243.6$  Hz), 113.2, 124.5, 131.4, 145.3, 152.2 (d,  $^2J_{P-C} = 16.3$  Hz); HRMS( $M^+$ ) Calcd for  $C_{17}H_{30}BrO_3P$  392.1116, Found 392.1095, 394.1121.

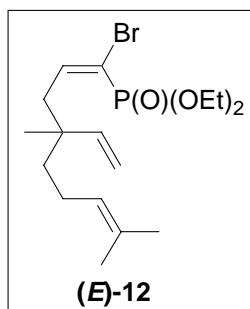

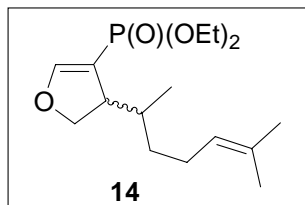

The mixture of **3-diethylphosphono-4 $\alpha$ -and-4 $\beta$ -(6'-methyl-5'-hepten-2'-yl)-4,5-dihydrofurans (14):**  $^{13}\text{C-NMR}$  (125.65 MHz)  $\delta$  13.1, 13.6, 16.3 (d,

$^3J_{\text{P-C}} = 5.0$  Hz), 16.4 (d,  $^3J_{\text{P-C}} = 3.8$  Hz), 17.5, 17.6, 17.6, 17.7, 25.7, 25.9,

26.1, 26.9, 27.9, 30.2, 33.0, 34.0, 35.4, 47.2 (d,  $^2J_{\text{P-C}} = 11.3$  Hz), 48.8 (d,  $^2J_{\text{P-C}} = 8.8$  Hz), 61.4 (d,  $^2J_{\text{P-C}} =$

5.0 Hz), 61.6 (d,  $^2J_{\text{P-C}} = 5.0$  Hz), 73.1 (d,  $^3J_{\text{P-C}} = 12.6$  Hz), 74.4 (d,  $^3J_{\text{P-C}} = 12.6$  Hz), 103.4 (d,  $^1J_{\text{P-C}} =$

213.6 Hz), 103.8 (d,  $^1J_{\text{P-C}} = 213.6$  Hz), 124.2, 124.6, 131.2, 131.6, 159.1 (d,  $^2J_{\text{P-C}} = 27.6$  Hz), 159.7 (d,

$^2J_{\text{P-C}} = 28.9$  Hz); HRMS( $\text{M}^+$ ) Calcd for  $\text{C}_{16}\text{H}_{29}\text{O}_4\text{P}$  316.1804, Found 316.1765.

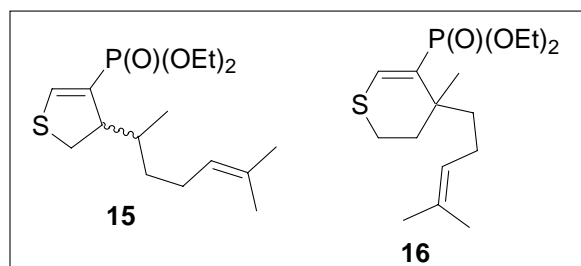

The mixture of **3-diethylphosphono-4 $\alpha$ -and-4 $\beta$ -(6'-methyl-5'-hepten-2'-yl)-4,5-dihydrothiophenes (15)**

**and 3-diethylphosphono-4-methyl-4-(4'-methyl-3'-penten-1'-yl)-4,5-dihydro-2H-thiopyran (16):** 4:1

mixture of **15** and **16**.  $^{13}\text{C-NMR}$  (125.65 MHz)  $\delta$  13.5, 13.6, 16.3 (d,  $^3J_{\text{P-C}} = 5.0$  Hz), 16.4 (d,  $^2J_{\text{P-C}} = 7.5$

Hz), 17.7, 18.1, 21.8, 21.9, 22.0, 23.7, 23.9, 25.4, 25.6, 25.7, 25.9, 26.4, 26.9, 27.8, 27.9, 29.4, 29.9,

30.5, 33.0 (d,  $^3J_{\text{P-C}} = 16.3$  Hz), 33.9 (d,  $^3J_{\text{P-C}} = 13.8$  Hz), 34.5, 35.2, 35.7, 36.9, 38.0, 45.4, 47.7, 47.8,

49.6, 53.3 (d,  $^2J_{\text{P-C}} = 15.1$  Hz), 55.4 (d,  $^2J_{\text{P-C}} = 15.1$  Hz), 61.6 (d,  $^2J_{\text{P-C}} = 6.3$  Hz), 61.9 (d,  $^2J_{\text{P-C}} = 6.3$  Hz),

123.7, 124.3, 124.7, 125.3 (d,  $^1J_{\text{P-C}} = 191.0$  Hz), 125.4 (d,  $^1J_{\text{P-C}} = 191.0$  Hz), 131.1, 131.6, 137.4 (d,  $^2J_{\text{P-C}} =$

15.1 Hz), 145.7 (d,  $^2J_{\text{P-C}} = 17.6$  Hz), 146.1 (d,  $^2J_{\text{P-C}} = 18.8$  Hz): HRMS( $\text{M}^+$ ) Calcd for  $\text{C}_{16}\text{H}_{29}\text{O}_3\text{PS}$

332.1575, Found 332.1554.

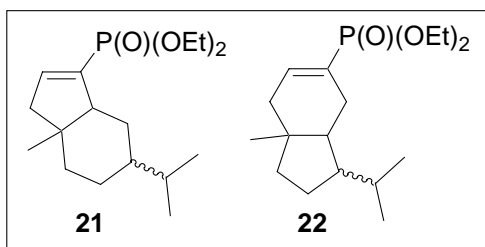

The mixture of **7-diethylphosphono-4-isopropyl-1-methyl-bicyclo[4.3.0]non-7-ene (21)** and **4-diethylphosphono-7-**

**isopropyl-1-methyl-bicyclo[4.3.0]non-3-ene (22):** A solution of  $\alpha$ -bromovinylphosphonate **12** (79 mg, 0.20 mmol),  $\text{Bu}_3\text{SnH}$

(90 mg, 0.3 mmol) and AIBN (3.3 mg, 0.02 mmol) in benzene (4 mL) was heated under reflux for 2.5 h,

until starting **12** was consumed completely. After removal of the solvent, the residue was

chromatographed on preparative TLC (silica gel; AcOEt : hexane = 1 : 1) to give a difficultly separable

18:82 mixture of **21** and **22** in 58 mg (92 %) yield. colorless oil;  $^{13}\text{C-NMR}$  (125.65 MHz,  $\text{CDCl}_3$ )  $\delta$  16.3 (d,  $^3J_{\text{P-C}} = 4.1$  Hz), 16.4 (d,  $^3J_{\text{P-C}} = 4.0$  Hz), 17.2, 17.9, 19.7, 19.8, 20.0, 22.0 (d,  $^3J_{\text{P-C}} = 9.3$  Hz), 22.0, 22.2, 22.3, 22.8, 23.9 (d,  $^3J_{\text{P-C}} = 9.3$  Hz), 24.8, 25.5, 25.9, 26.3, 26.5, 29.1, 29.4, 29.5, 30.3, 32.6, 32.8, 34.3, 34.9 (d,  $^2J_{\text{P-C}} = 17.6$  Hz), 35.4, 35.6, 36.5, 37.3 (d,  $^2J_{\text{P-C}} = 17.6$  Hz), 39.3, 39.4, 39.9, 41.4, 42.4 (d,  $^3J_{\text{P-C}} = 18.6$  Hz), 43.0 (d,  $^3J_{\text{P-C}} = 8.3$  Hz), 47.3 (d,  $^3J_{\text{P-C}} = 17.6$  Hz), 48.0, 49.8, 52.3 (d,  $^2J_{\text{P-C}} = 12.4$  Hz), 54.8 (d,  $^2J_{\text{P-C}} = 12.4$  Hz), 61.4 (d,  $^2J_{\text{P-C}} = 5.2$  Hz), 61.4 (d,  $^2J_{\text{P-C}} = 5.2$  Hz), 125.0 (d,  $^1J_{\text{P-C}} = 181.9$  Hz), 126.1 (d,  $^1J_{\text{P-C}} = 181.9$  Hz), 142.1 (d,  $^2J_{\text{P-C}} = 9.3$  Hz), 142.7 (d,  $^2J_{\text{P-C}} = 10.3$  Hz), 146.2 (d,  $^2J_{\text{P-C}} = 13.4$  Hz), 148.5 (d,  $^2J_{\text{P-C}} = 13.4$  Hz); HRMS( $\text{M}^+$ ) Calcd for  $\text{C}_{17}\text{H}_{31}\text{O}_3\text{P}$  314.2011, Found 314.2037.

## References

- (1) Kouno, R.; Okauchi, T.; Nakamura, M.; Ichikawa, J.; Minami, T. *J. Org. Chem.* **1998**, *63*, 6239.
- (2) Rengaraju, S.; Berlin, K. D., *J. Org. Chem.* **1972**, *37*, 3304.
- (3) 3,7-dimethyl-3-vinyl-6-octenal was prepared in 57 % yield from methyl 3,7-dimethyl-3-vinyl-6-octenylcarboxylate and DIBAL-H in  $\text{CH}_2\text{Cl}_2$  at -78 for 2h.

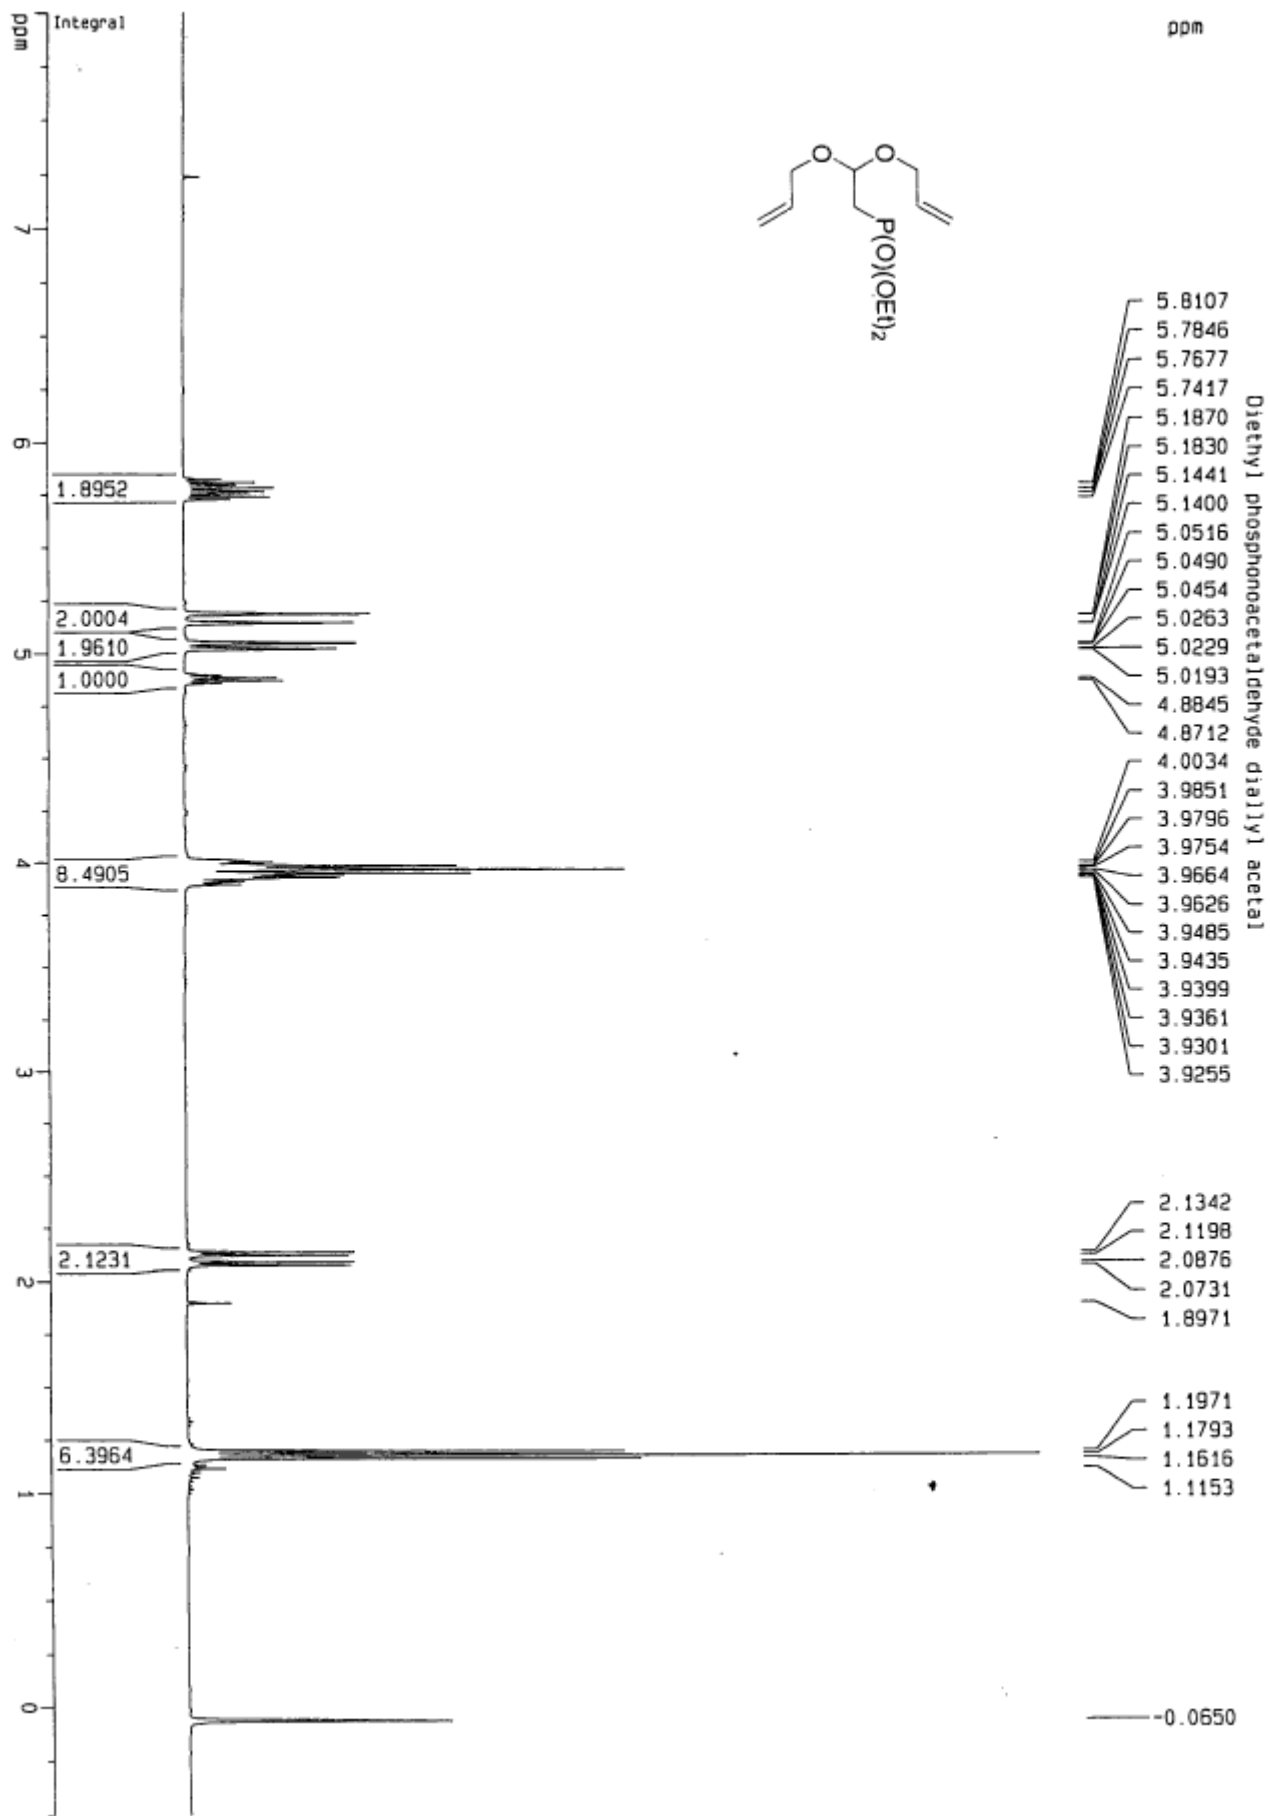

Diethyl [ phosphonoacetaldehyde diallyl ] acetal

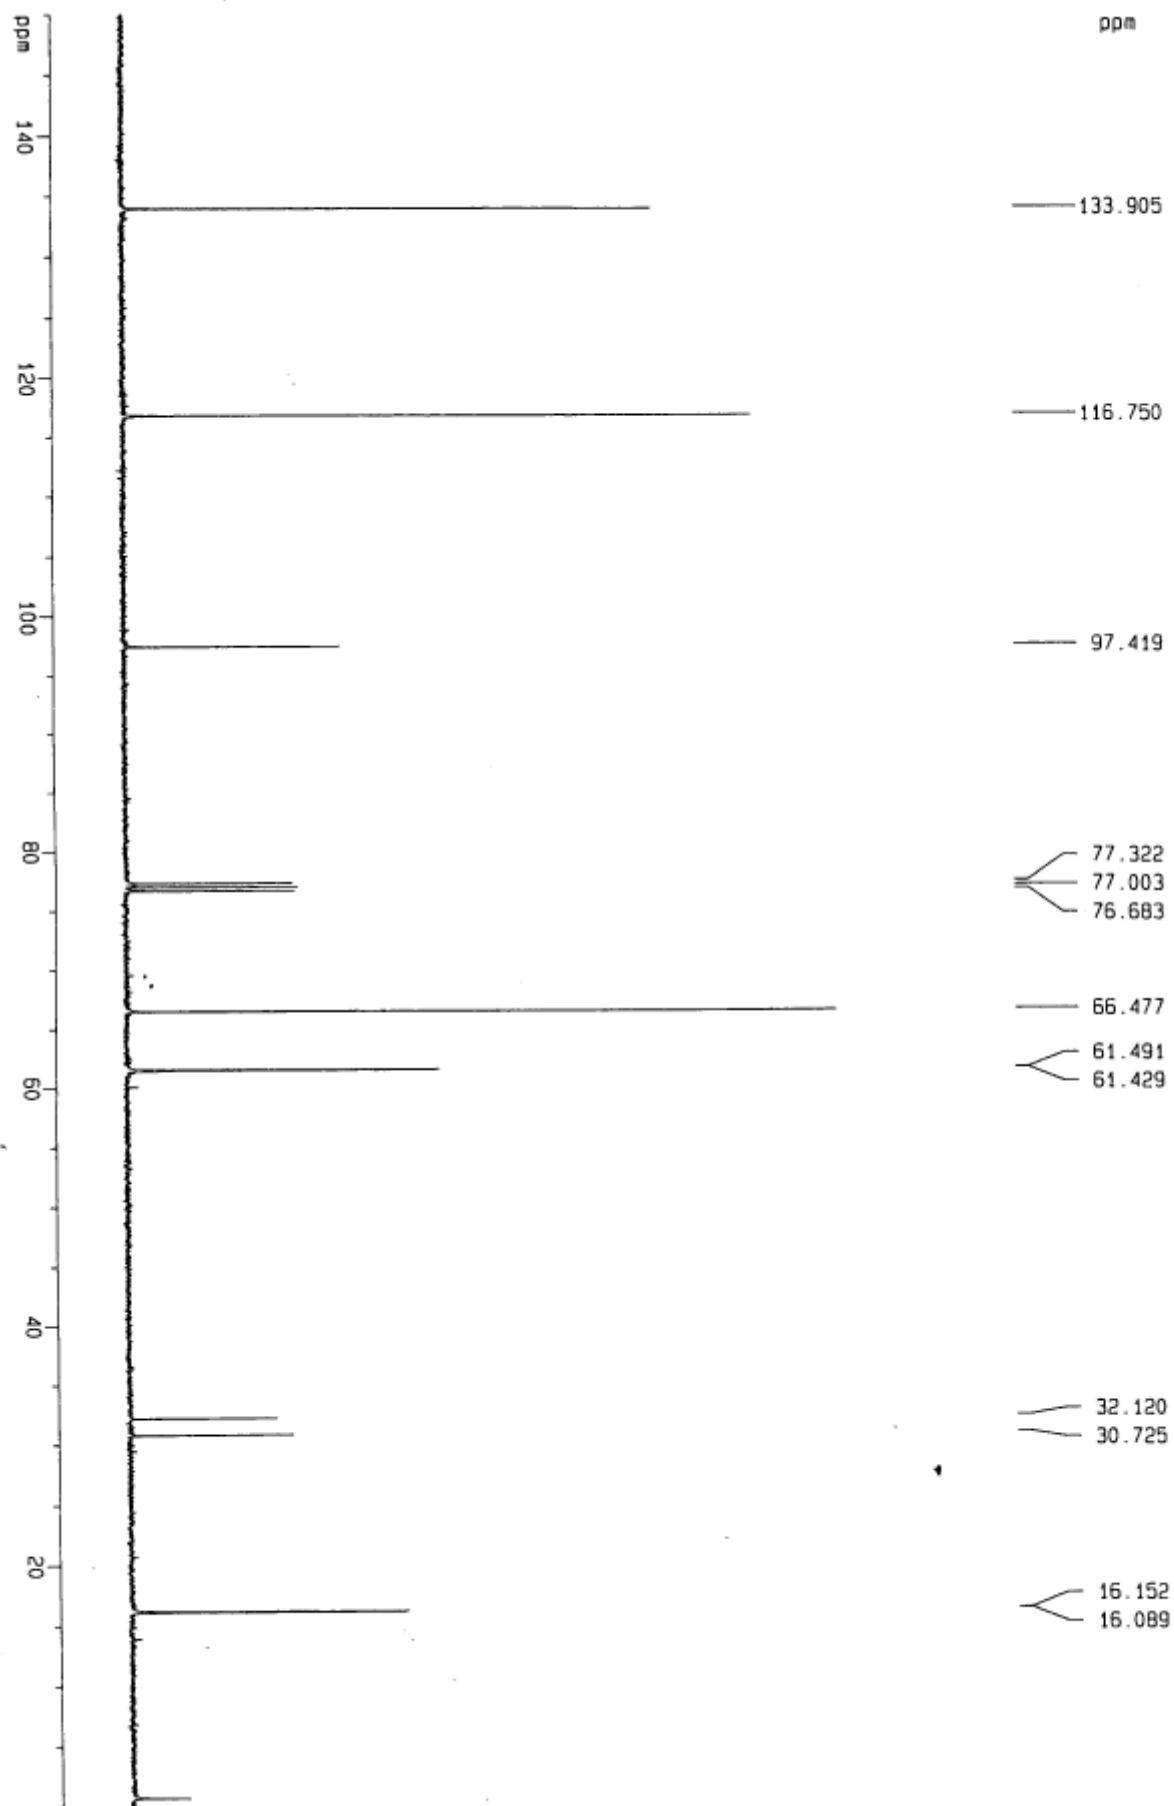





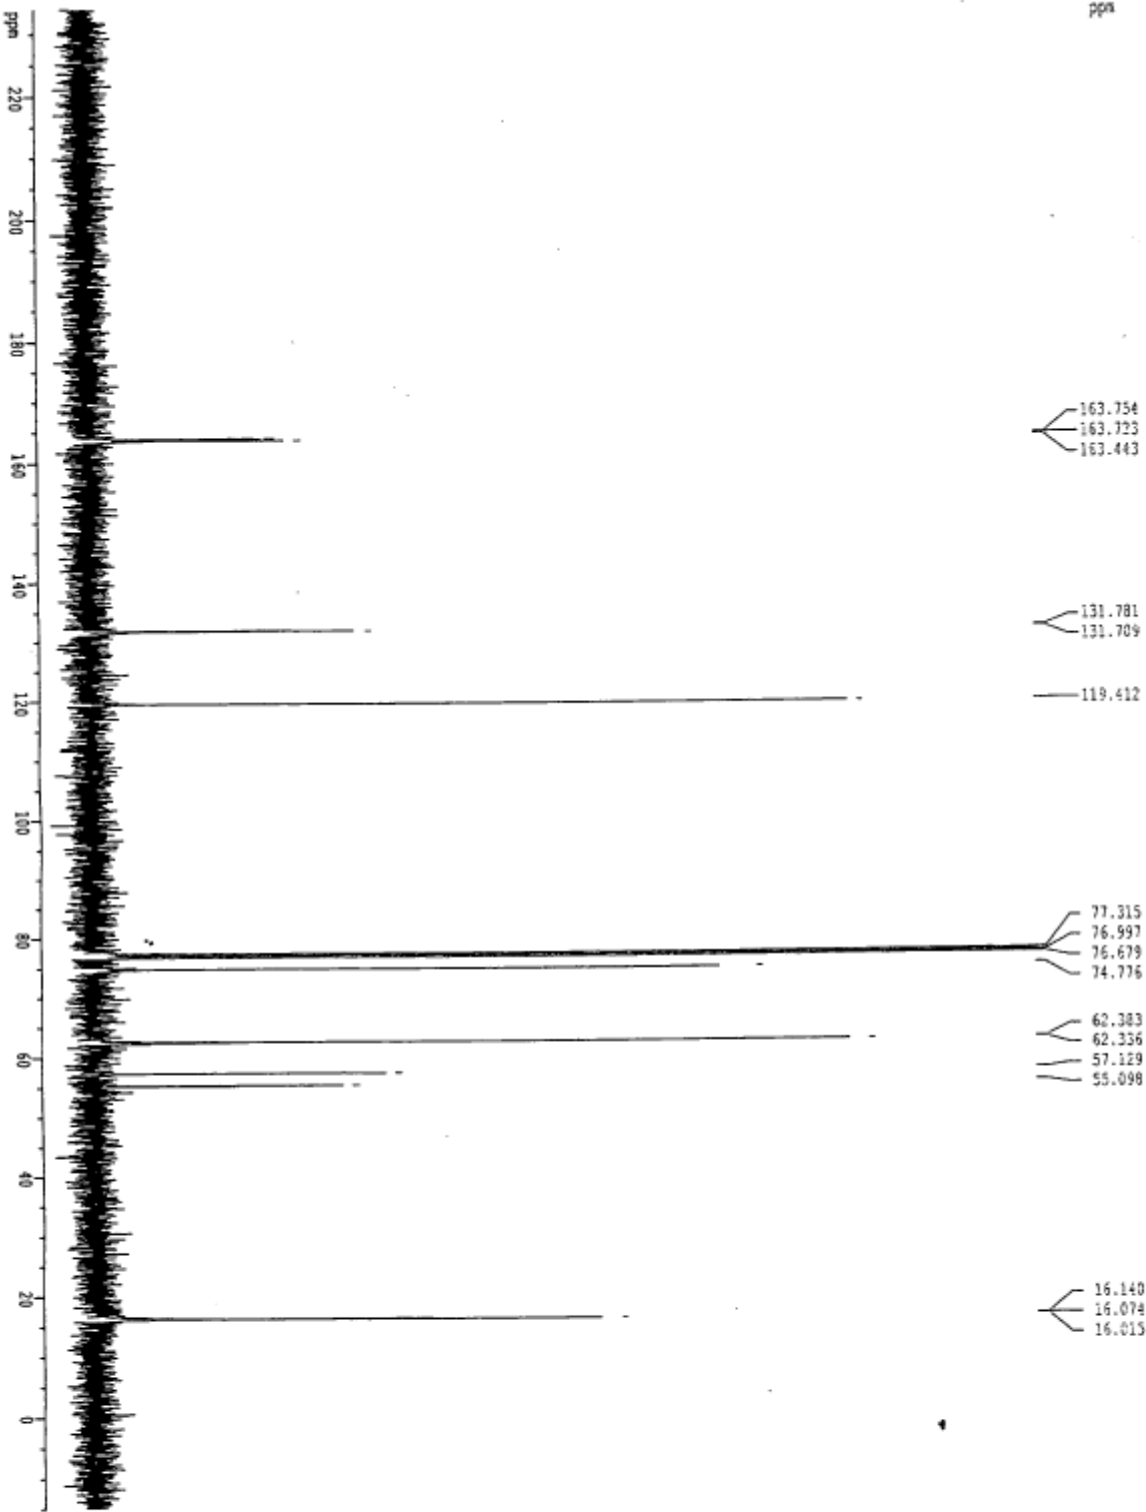

ppm

163.754  
163.725  
163.443

131.781  
131.709

119.612

77.315  
76.997  
76.679  
74.776

62.383  
62.356  
57.129  
55.098

16.140  
16.074  
16.015

Current Data Parameters  
NAME 03agano  
EXPTNO 2541  
PROCNO 1

F2 - Acquisition Parameters  
Date\_ 20020515  
Time 2.07

INSTRUM dpx400  
PROBHD 5 mm BBO BB-  
PULPROG zgpg30  
TD 65536  
SOLVENT CDCl3  
NS 256  
DS 2  
SFR 25062.656 Hz  
FIDRES 0.388426 Hz  
AQ 1.3074932 sec  
RG 6502  
DM 19.950 usec  
DE 6.00 usec  
TE 300.0 K  
D1 2.00000000 sec  
D11 0.03000000 sec

\*\*\*\*\* CHANNEL F1 \*\*\*\*\*  
NUC1 13C  
P1 7.90 usec  
PL1 -2.00 dB  
SFO1 100.6237959 MHz

\*\*\*\*\* CHANNEL F2 \*\*\*\*\*  
CPDPRG2 waltz16  
NUC2 1H  
PCPD2 80.00 usec  
PL2 -6.00 dB  
PL12 15.50 dB  
SFO2 400.1316005 MHz

F2 - Processing parameters  
SI 32768  
SF 100.6127798 MHz  
WDW EM  
SSB 0  
LB 1.00 Hz  
GB 0  
PC 1.40

1D NMR plot parameters  
CX 30.00 cm  
FLP 234.041 ppm  
F1 23547.49 Hz  
F2P -15.059 ppm  
F2 -1515.17 Hz  
PRKMH 8.30334 ppm/cm  
HZCM 835.42188 Hz/cm

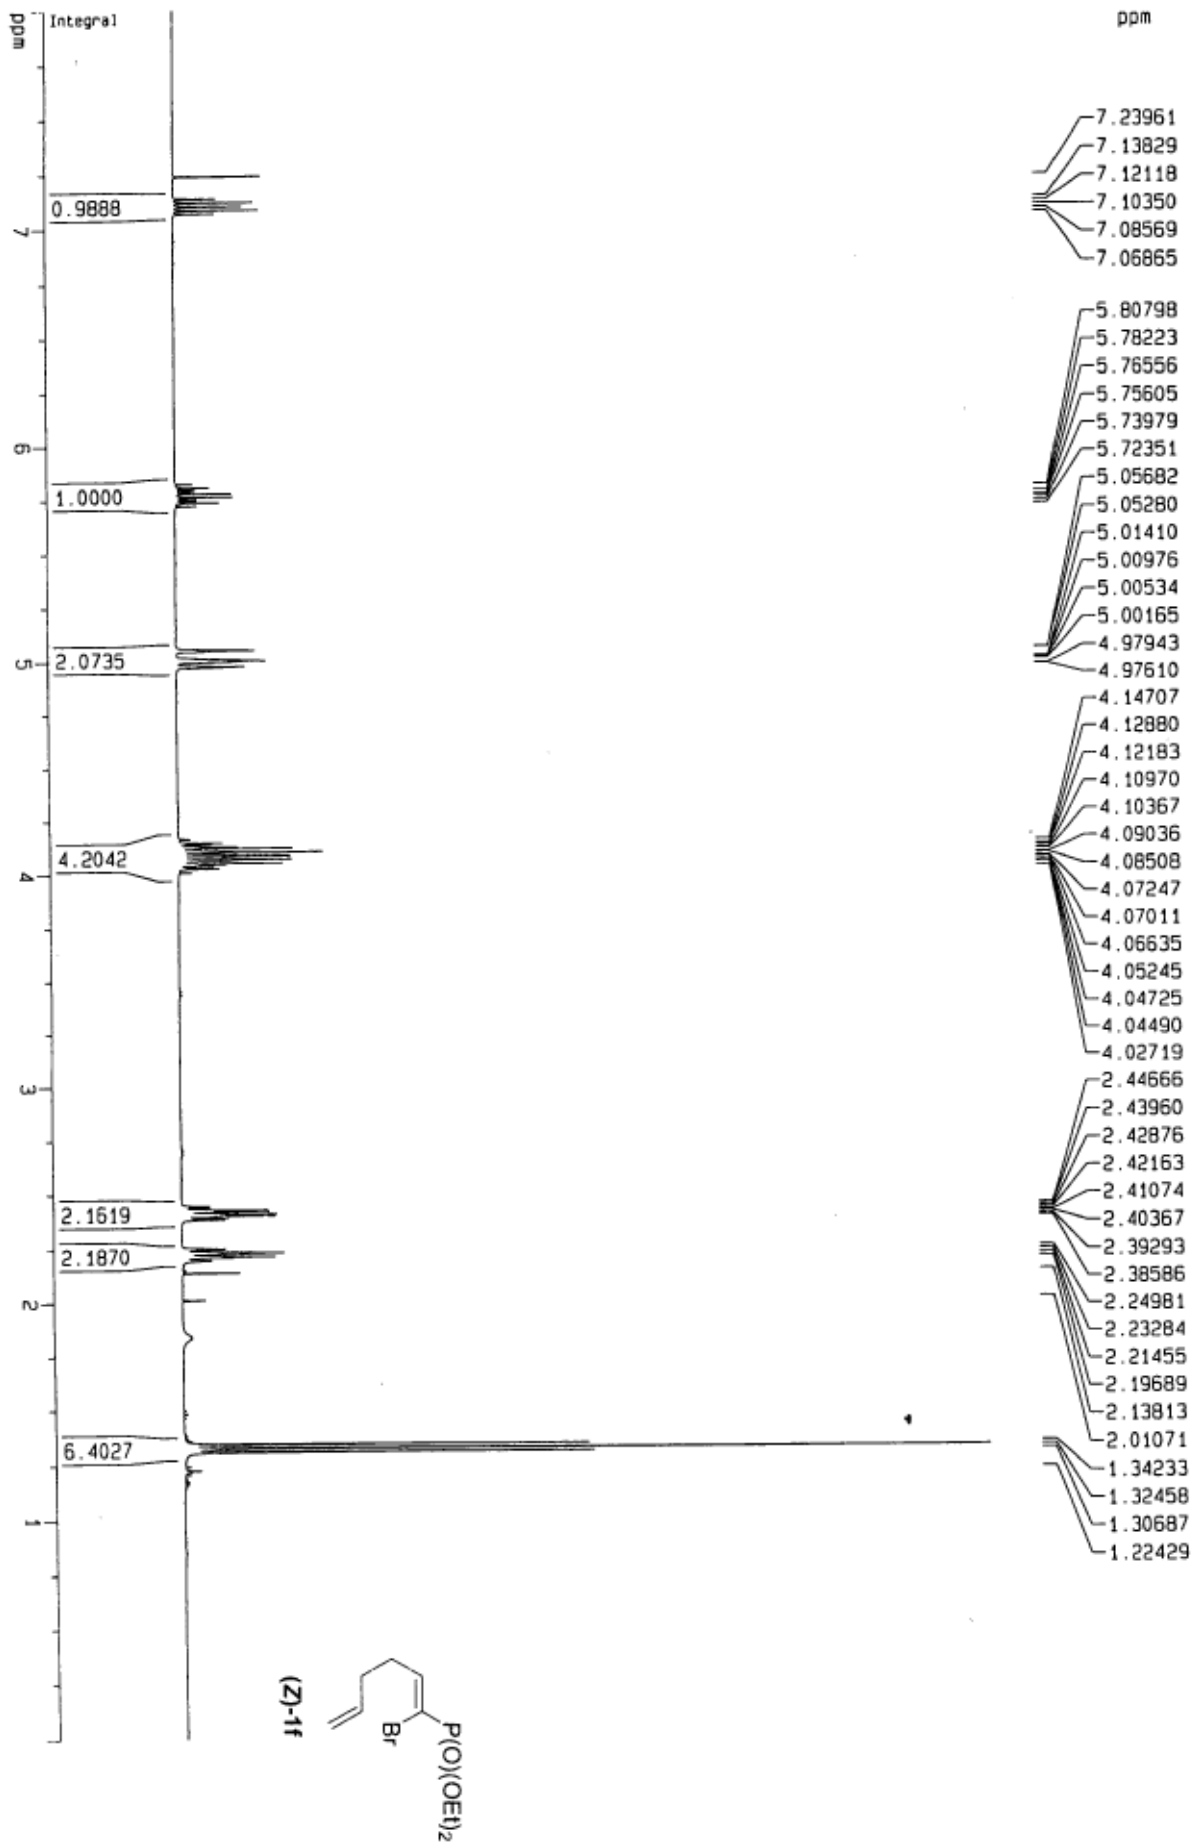

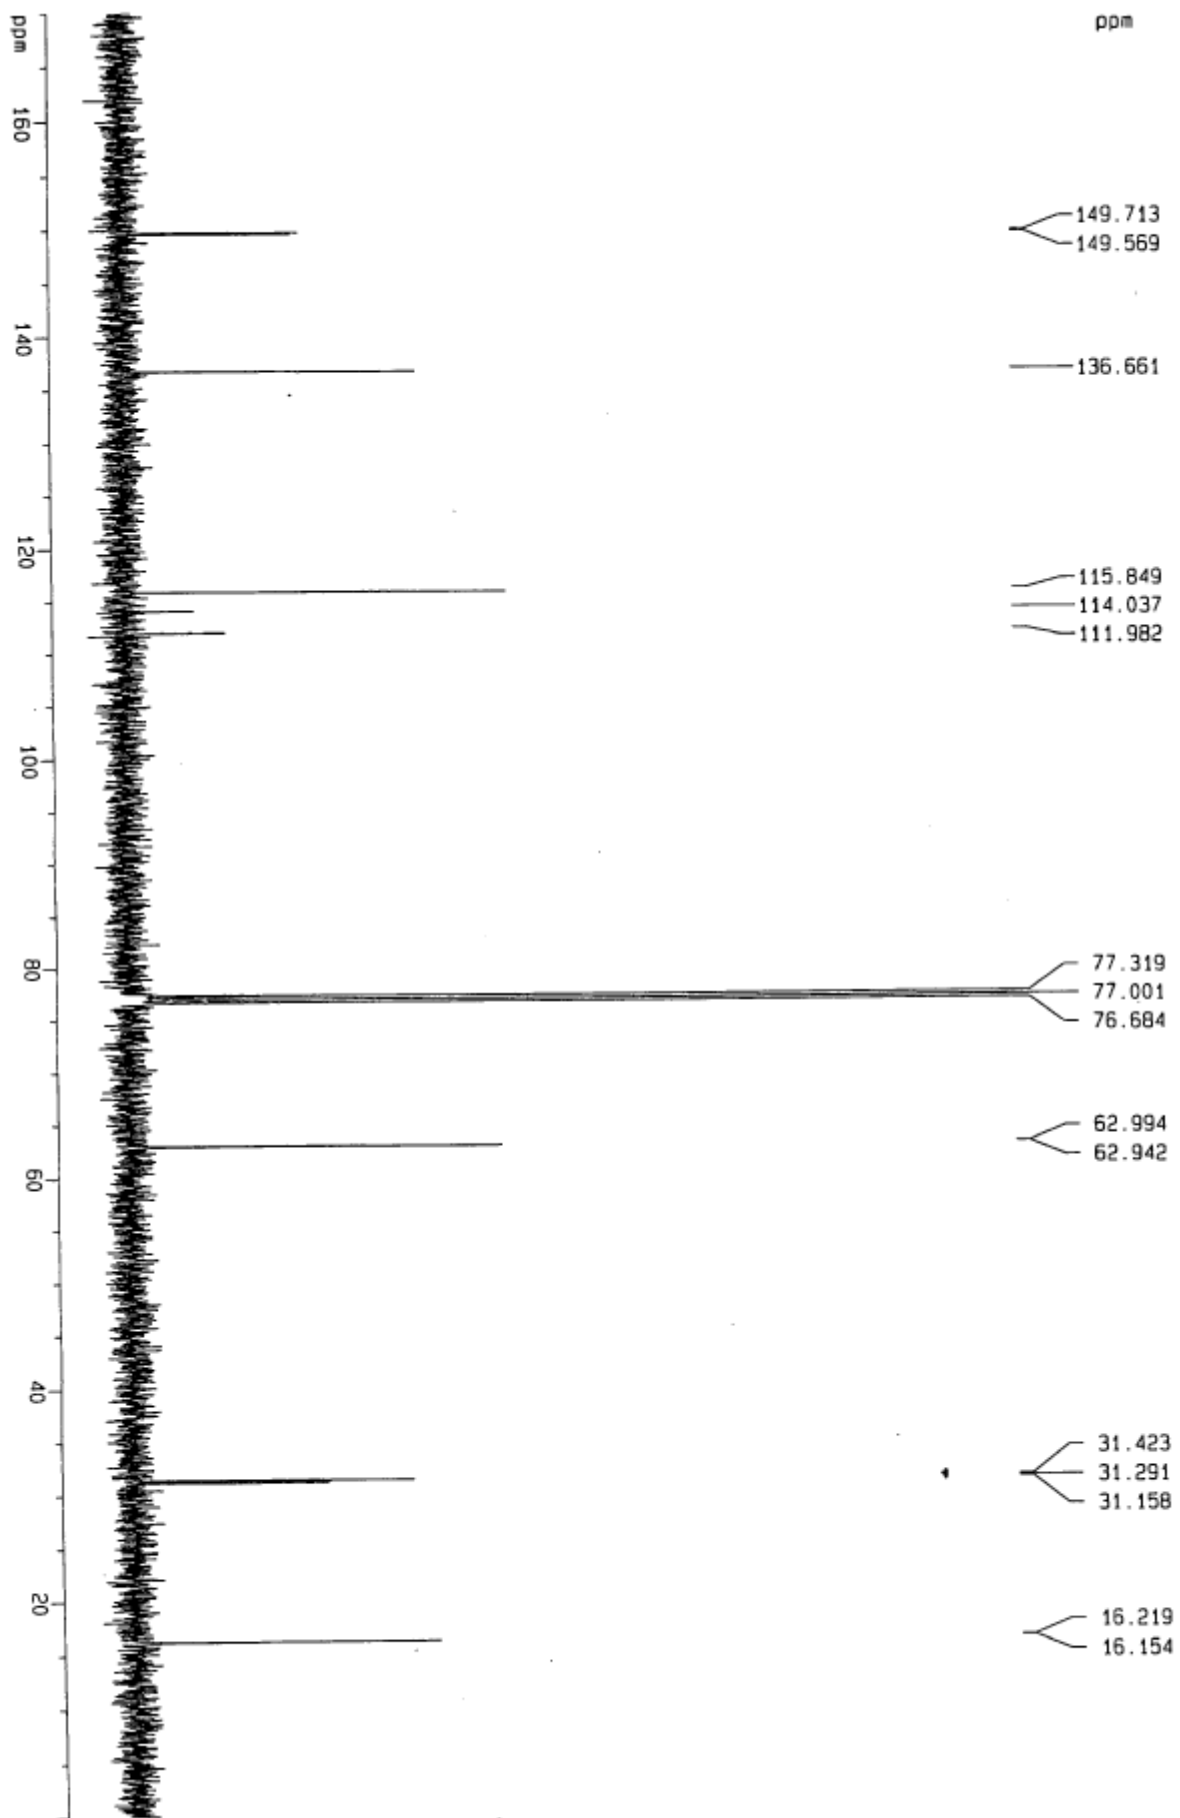

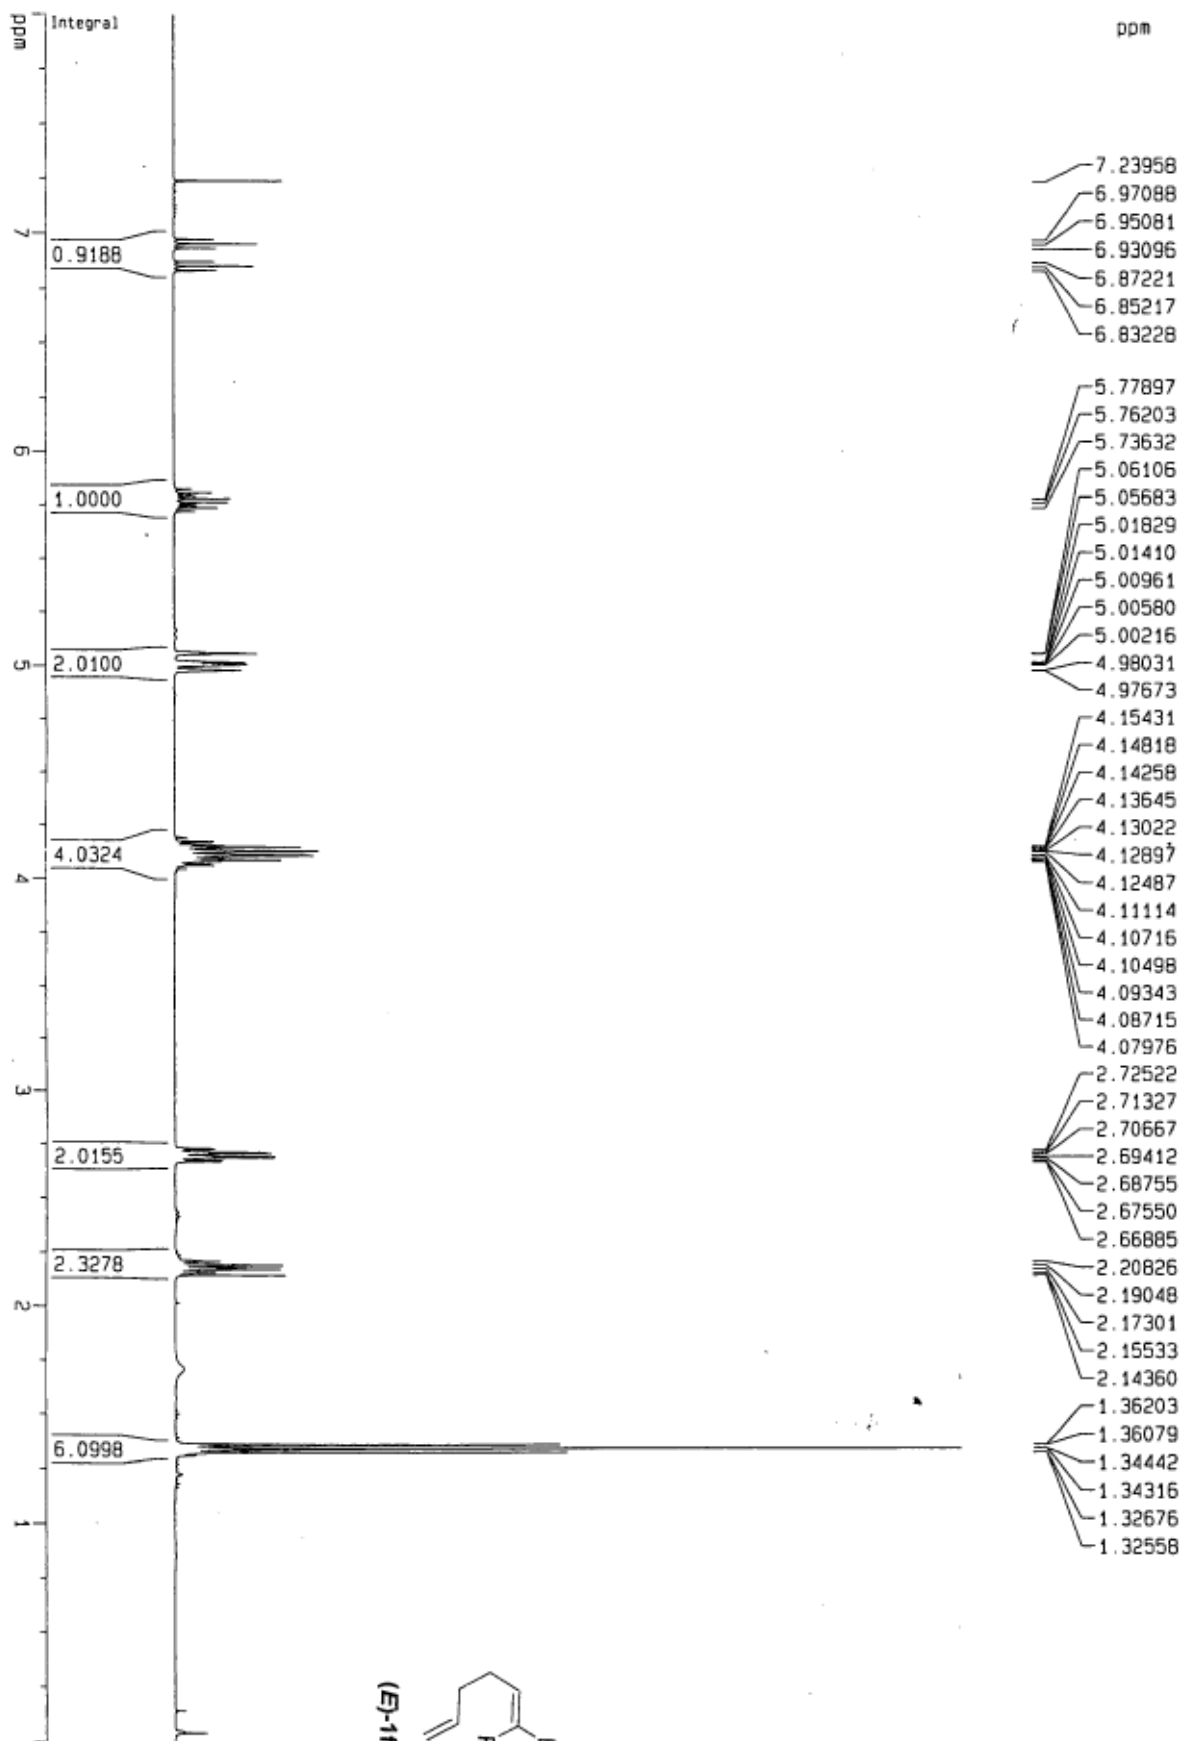

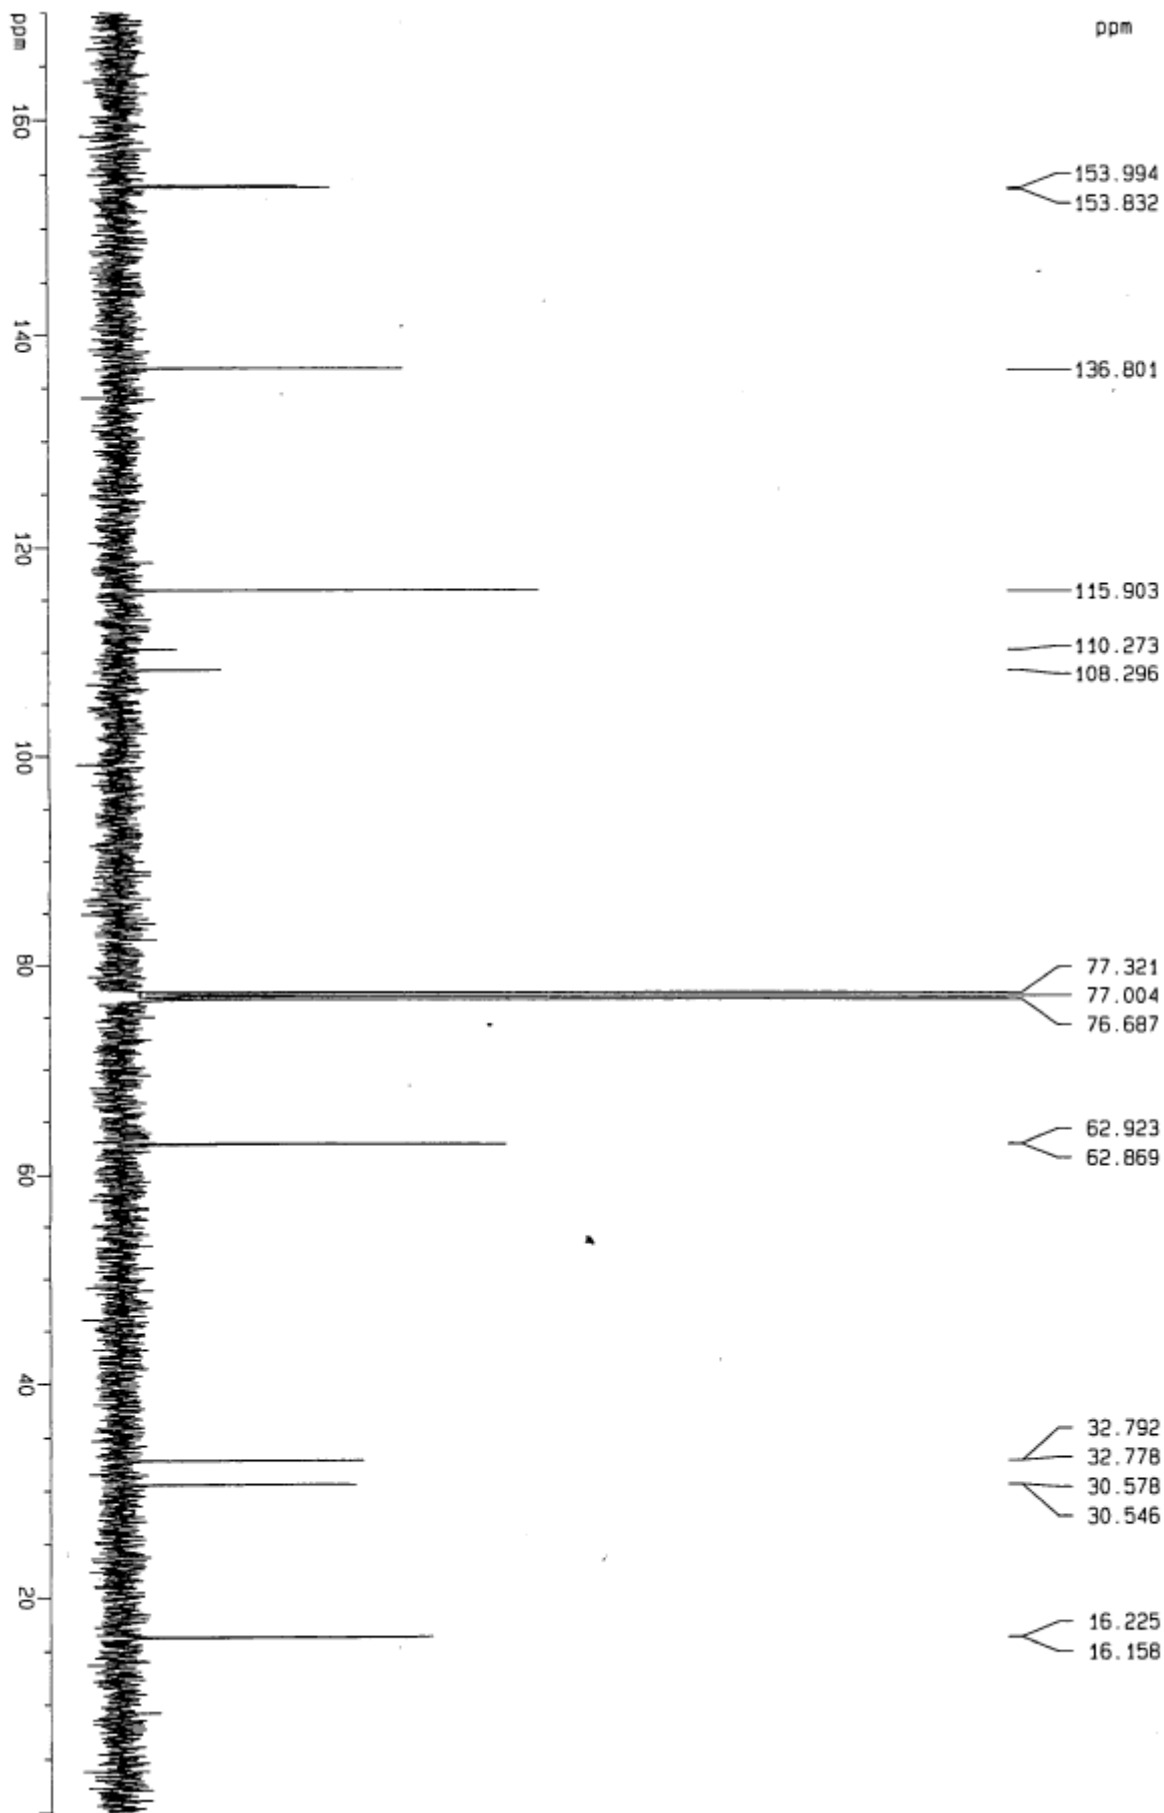

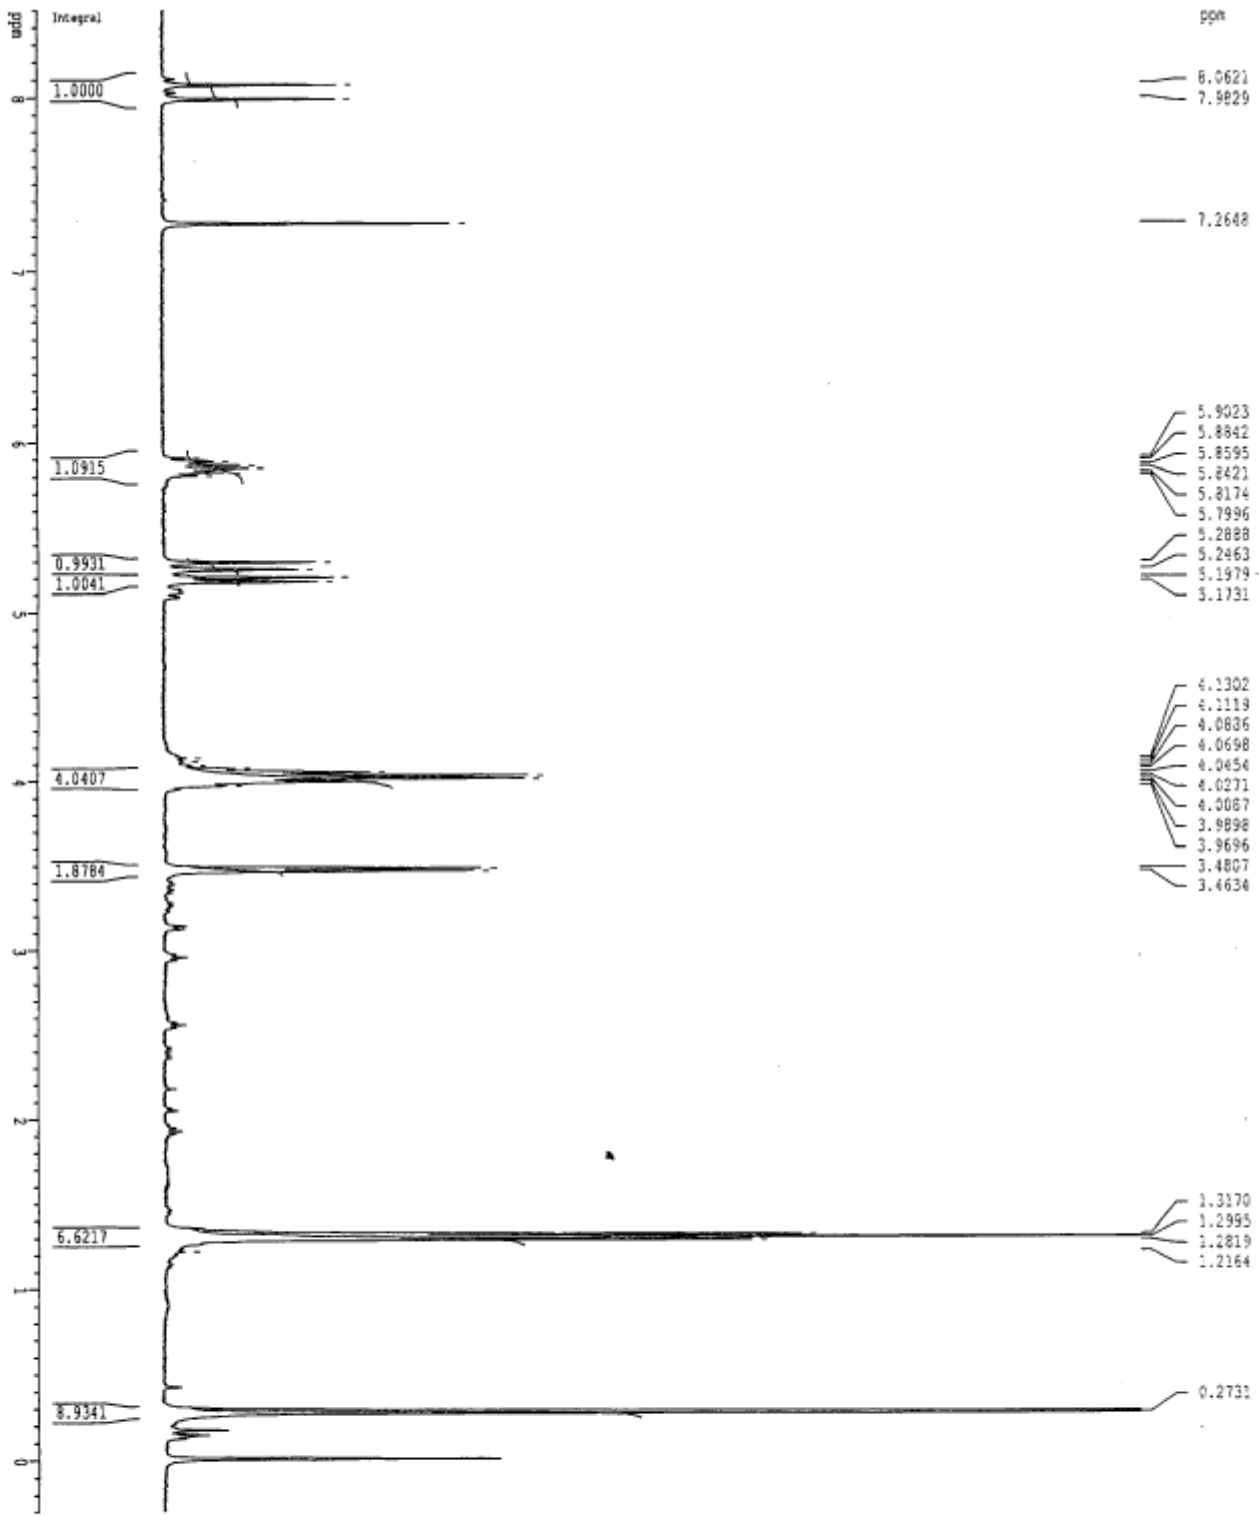

Current Data Parameters  
 NAME: 019pno  
 CKNO: 3491  
 PRCKNO: 1

F2 - Acquisition Parameters  
 Date\_: 20021011  
 Time: 11.13  
 INSTRUM: dx400  
 PROBRD: 5 mm BBO BB-  
 PULPROG: zg30  
 TO: 65.516  
 SOLVENT: CDCl3  
 NS: 16  
 DS: 2  
 SWH: 8250.825 Hz  
 FIDRES: 0.175888 Hz  
 AQ: 3.9715316 sec  
 SFO: 512  
 TM: 66.400 umsec  
 TE: 6.00 umsec  
 TS: 300.0 K  
 D1: 1.00000000 sec

===== CHANNEL f1 =====  
 NUC1: 13C  
 P1: 1.00 umsec  
 PL1: -4.00 dB  
 SFO1: 100.126119 MHz

F2 - Processing parameters  
 SI: 32768  
 SF: 100.1260977 MHz  
 SWH: 8250.825 Hz  
 DS: 2  
 SFO: 512  
 TM: 66.400 Hz  
 TE: 1.08

1D NMR plot parameters:  
 CT: 30.00 cm  
 C1: 8.508 ppm  
 F1: 3461.16 Hz  
 F2: 0.308 ppm  
 F3: -121.04 Hz  
 FWHM: 0.28033 Hz/cm  
 RMSC: 131.31147 Hz/cm

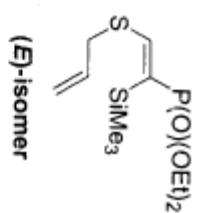

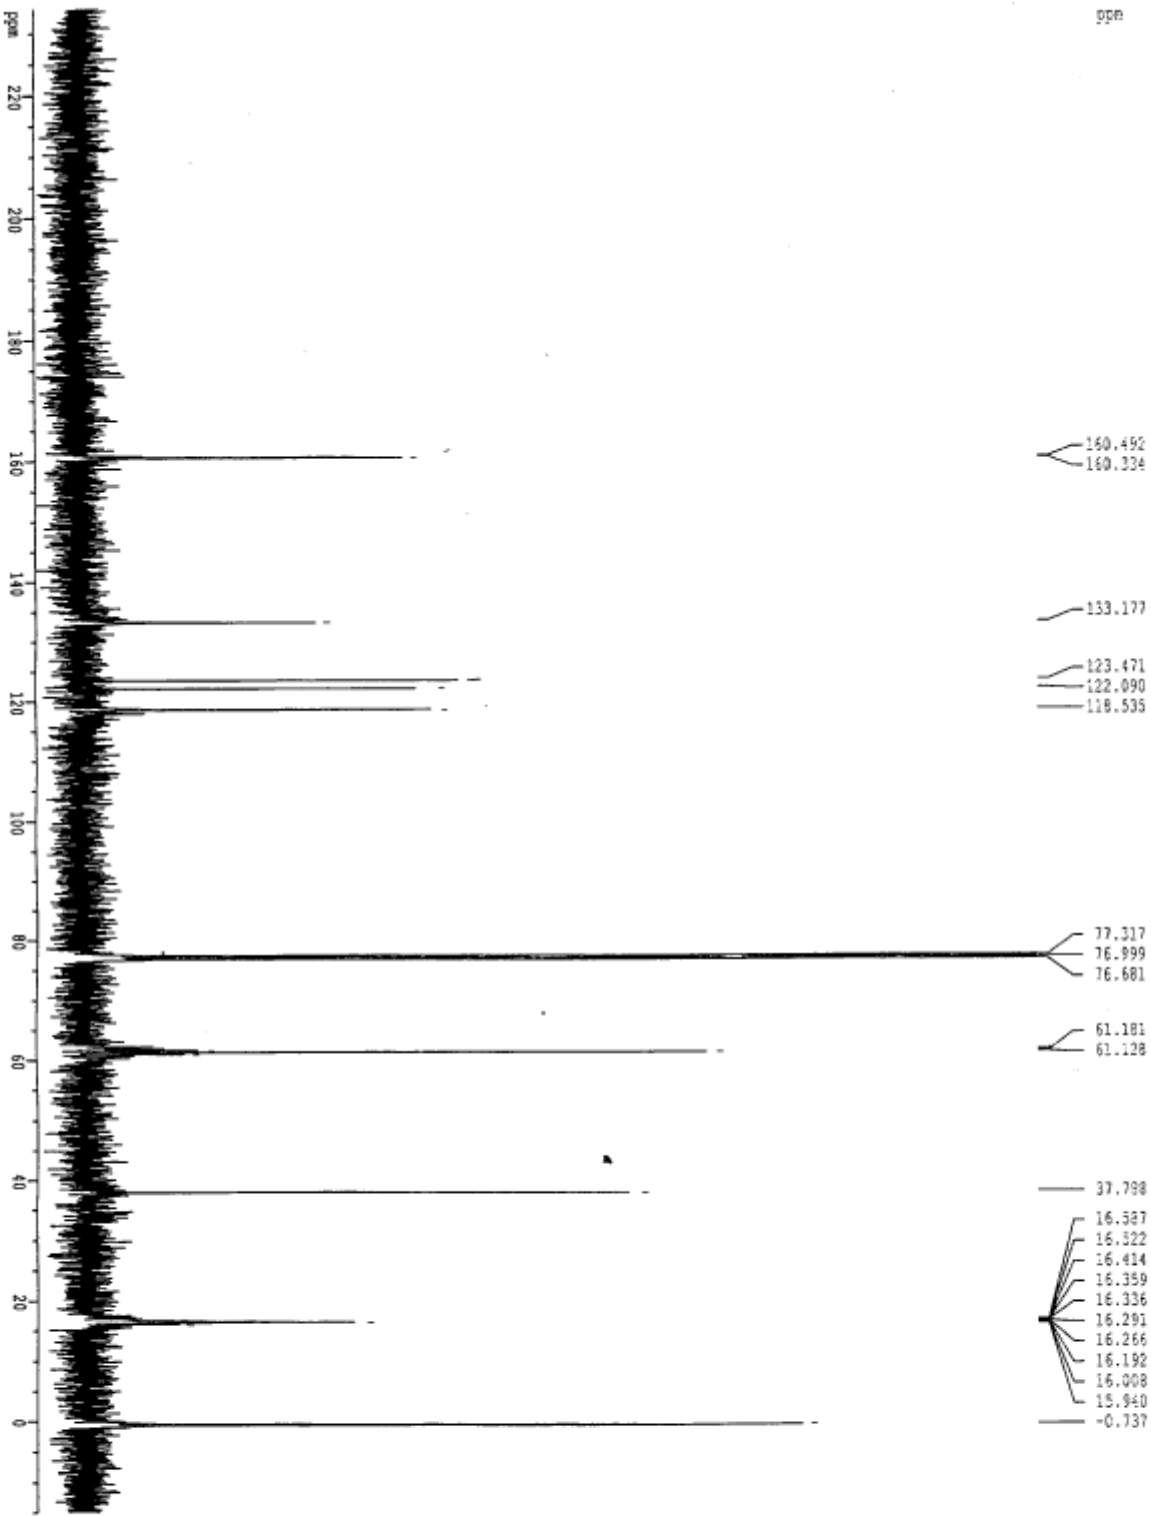

Current Data Parameters  
 NAME 03agene  
 EXPNO 3123  
 PROCNO 1

F2 - Acquisition Parameters  
 Date\_ 20020906  
 Time 23.18

INSTRUM dpx400  
 PROBRD 5 mm BBO BB-  
 PULPROG zgpg30  
 TD 65536  
 SOLVENT CDCl3  
 NS 512  
 DS 2  
 SWH 25062.656 Hz  
 FIDRES 0.382426 Hz  
 AQ 1.3074932 sec  
 RG 6502  
 DM 19.950 usec  
 DE 6.00 usec  
 TE 300.0 K  
 D1 2.00000000 sec  
 D11 0.03000000 sec

CHANNEL f1 -----  
 NUC1 13C  
 P1 7.90 usec  
 PL1 -2.00 dB  
 SFO1 100.6237959 MHz

CHANNEL f2 -----  
 CPDPRG2 waltz16  
 NUC2 1H  
 P2 80.00 usec  
 PL2 -6.00 dB  
 PL12 15.50 dB  
 SFO2 400.1316005 MHz

F2 - Processing parameters  
 SI 32768  
 SF 100.6127152 MHz  
 MDW EM  
 SSB 0  
 LB 1.00 Hz  
 GB 0  
 PC 1.40

1D NMR plot parameters  
 CX 30.00 cm  
 F1P 234.086 ppm  
 F1 23552.07 Hz  
 F2P -15.014 ppm  
 F2 -1510.58 Hz  
 PPHCM 8.30334 ppm/cm  
 HSCM 835.42188 Hz/cm



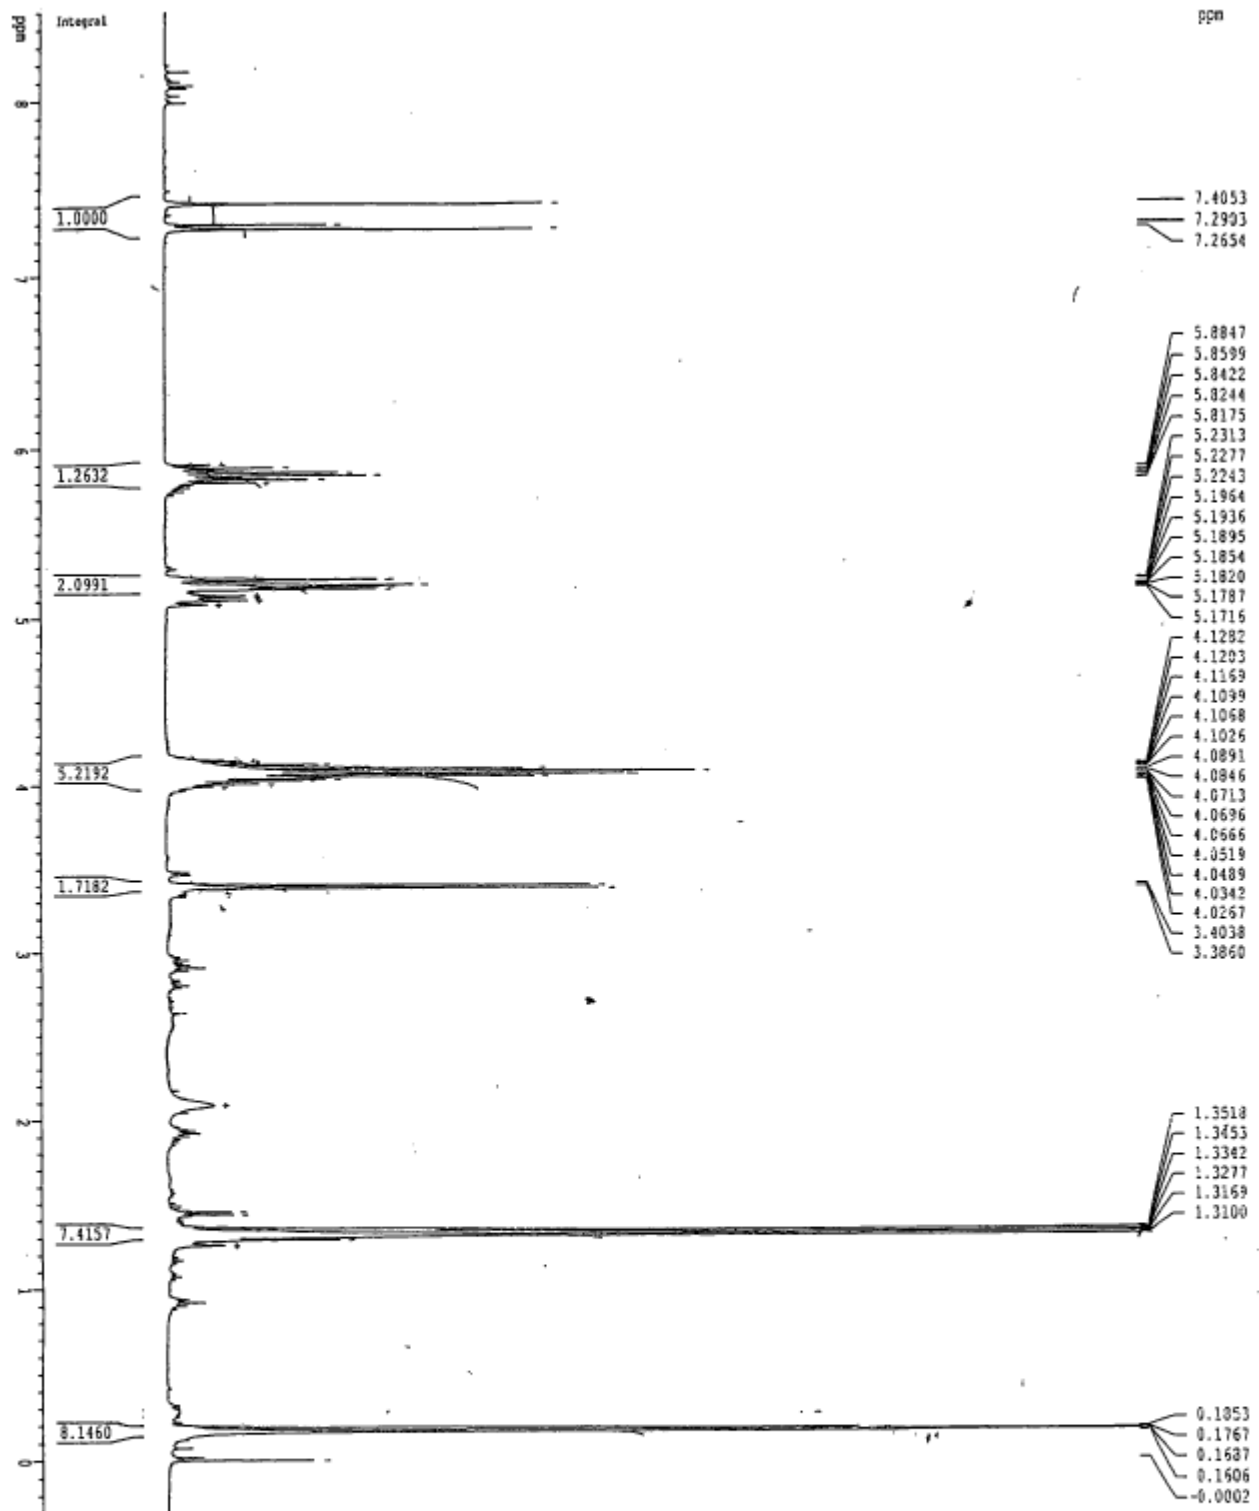

Current Data Parameters  
 NAME: 01agpno  
 EXPNO: 1121  
 PROCNO: 1

F2 - Acquisition Parameters  
 Date\_: 20020906  
 Time: 22.38  
 INSTRUM: spect  
 PROBNM: 5 mm BBO BB-  
 PULPROG: zg30  
 TO: 65516  
 SOLVENT: CDCl3  
 NS: 16  
 DS: 2  
 SWH: 8250.825 Hz  
 FIDRES: 0.128898 Hz  
 AQ: 3.9715316 sec  
 RG: 128  
 DW: 60.600 usec  
 DE: 6.00 usec  
 TE: 300.2 K  
 D1: 1.00000000 sec

----- CHANNEL f1 -----  
 NUC1: 1H  
 P1: 1.50 usec  
 PL1: -6.50 dB  
 SFO1: 400.1264710 MHz

F2 - Processing parameters  
 SI: 32768  
 SF: 400.1269976 MHz  
 NPM: EM  
 SSB: 0  
 LB: 6.30 Hz  
 GB: 0  
 PC: 1.00

1D NMR plot parameters  
 CX: 30.00 cm  
 CY: 8.500 ppm  
 F1P: 3401.10 Hz  
 F2: -0.300 ppm  
 F2: -120.04 Hz  
 PRICK: 0.29333 ppm/cm  
 RECH: 117.37143 Hz/cm

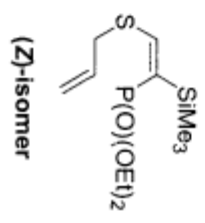

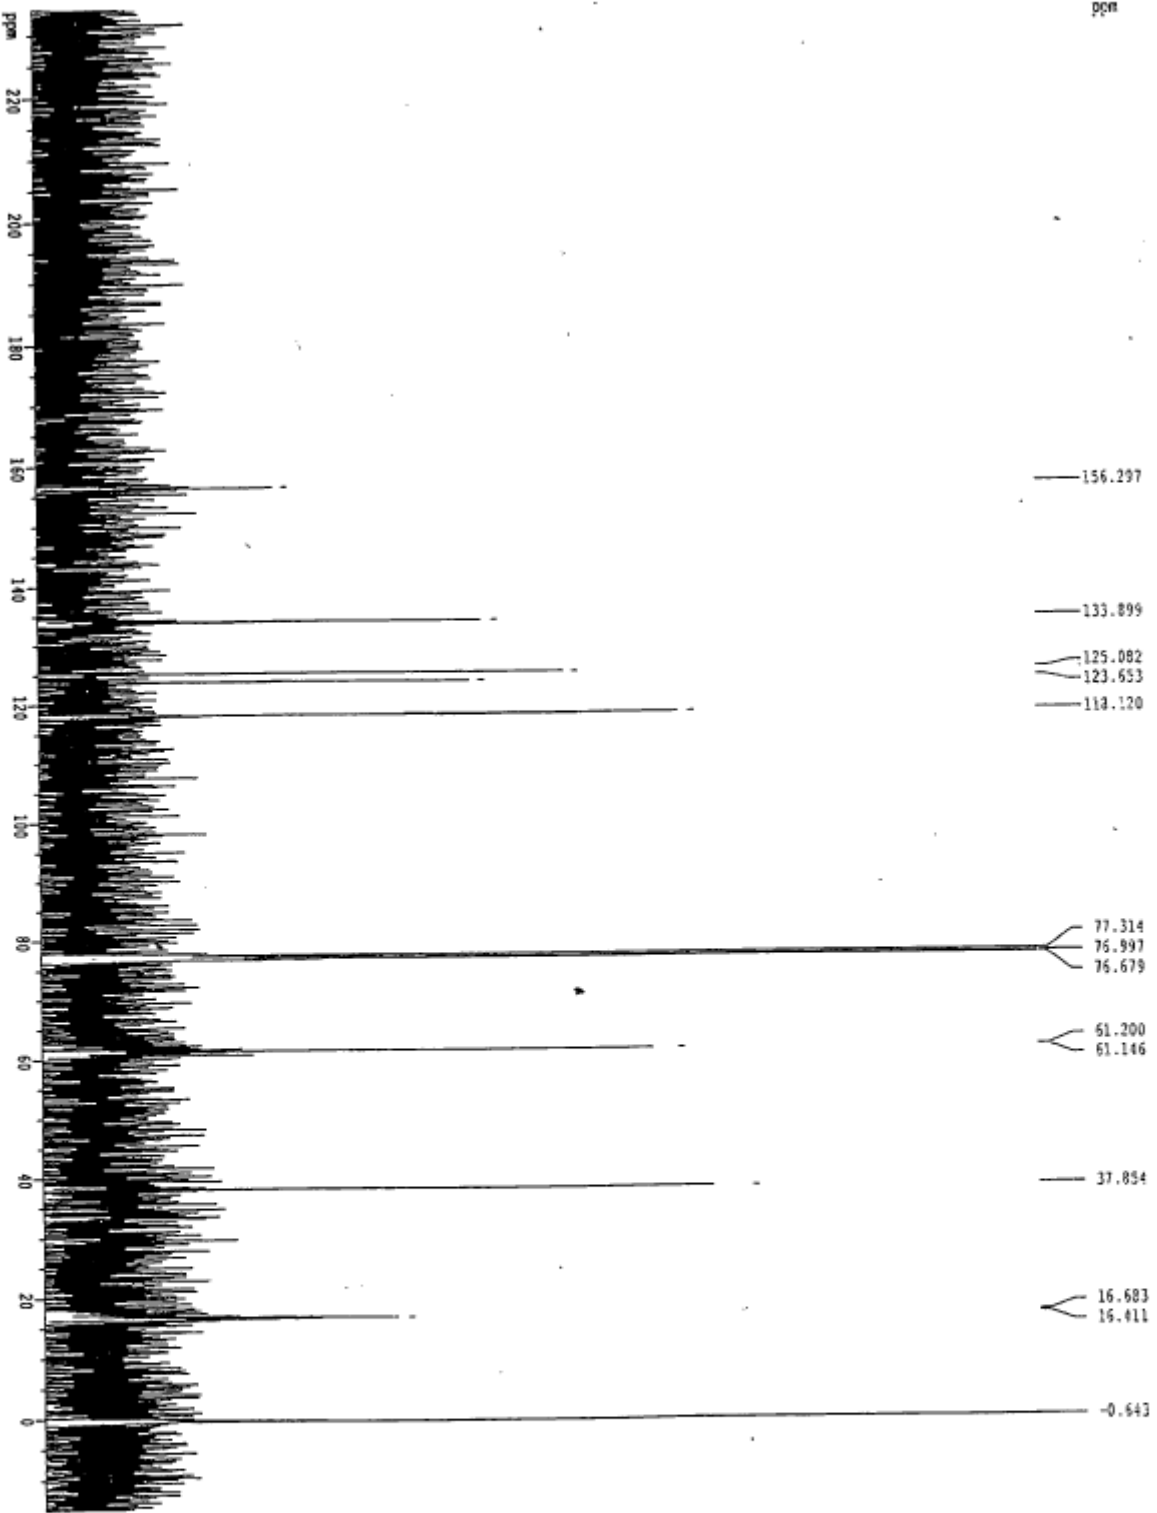

ppm

Current Data Parameters  
 NAME 03agene  
 EXPNO 3403  
 PROCNO 1

F2 - Acquisition Parameters

Date\_ 20021002  
 Time 13:32  
 INSTRUM dp400  
 PROBRD 5 mm BBO BB-  
 PULPROG zgpg30  
 TD 65536  
 SOLVENT CMC13  
 NS 768  
 DS 2  
 SWH 25062.656 Hz  
 FIDRES 0.382426 Hz  
 AQ 1.3074932 sec  
 RG 6502  
 DM 19.950 usec  
 DE 6.00 usec  
 TE 300.0 K  
 D1 2.00000000 sec  
 D11 0.03000000 sec

CHANNEL F1

NUC1 13C  
 P1 7.90 usec  
 PL1 -2.00 dB  
 SFO1 100.6237959 MHz

CHANNEL F2

CPDPRG2 waltz16  
 NUC2 1H  
 PCPD2 80.00 usec  
 PL2 -6.00 dB  
 PL12 15.50 dB  
 SFO2 400.1316005 MHz

F2 - Processing parameters

SI 32768  
 SF 100.6127729 MHz  
 MDW EX  
 SSB 0  
 LR 1.00 Hz  
 GB 0  
 PC 1.40

1D NMR plot parameters

CX 30.00 cm  
 F1P 234.109 ppm  
 F1 23554.37 Hz  
 F2P -14.991 ppm  
 F2 -1508.28 Hz  
 PPMCN 8.30334 ppm/cm  
 HZCN 835.42188 Hz/cm

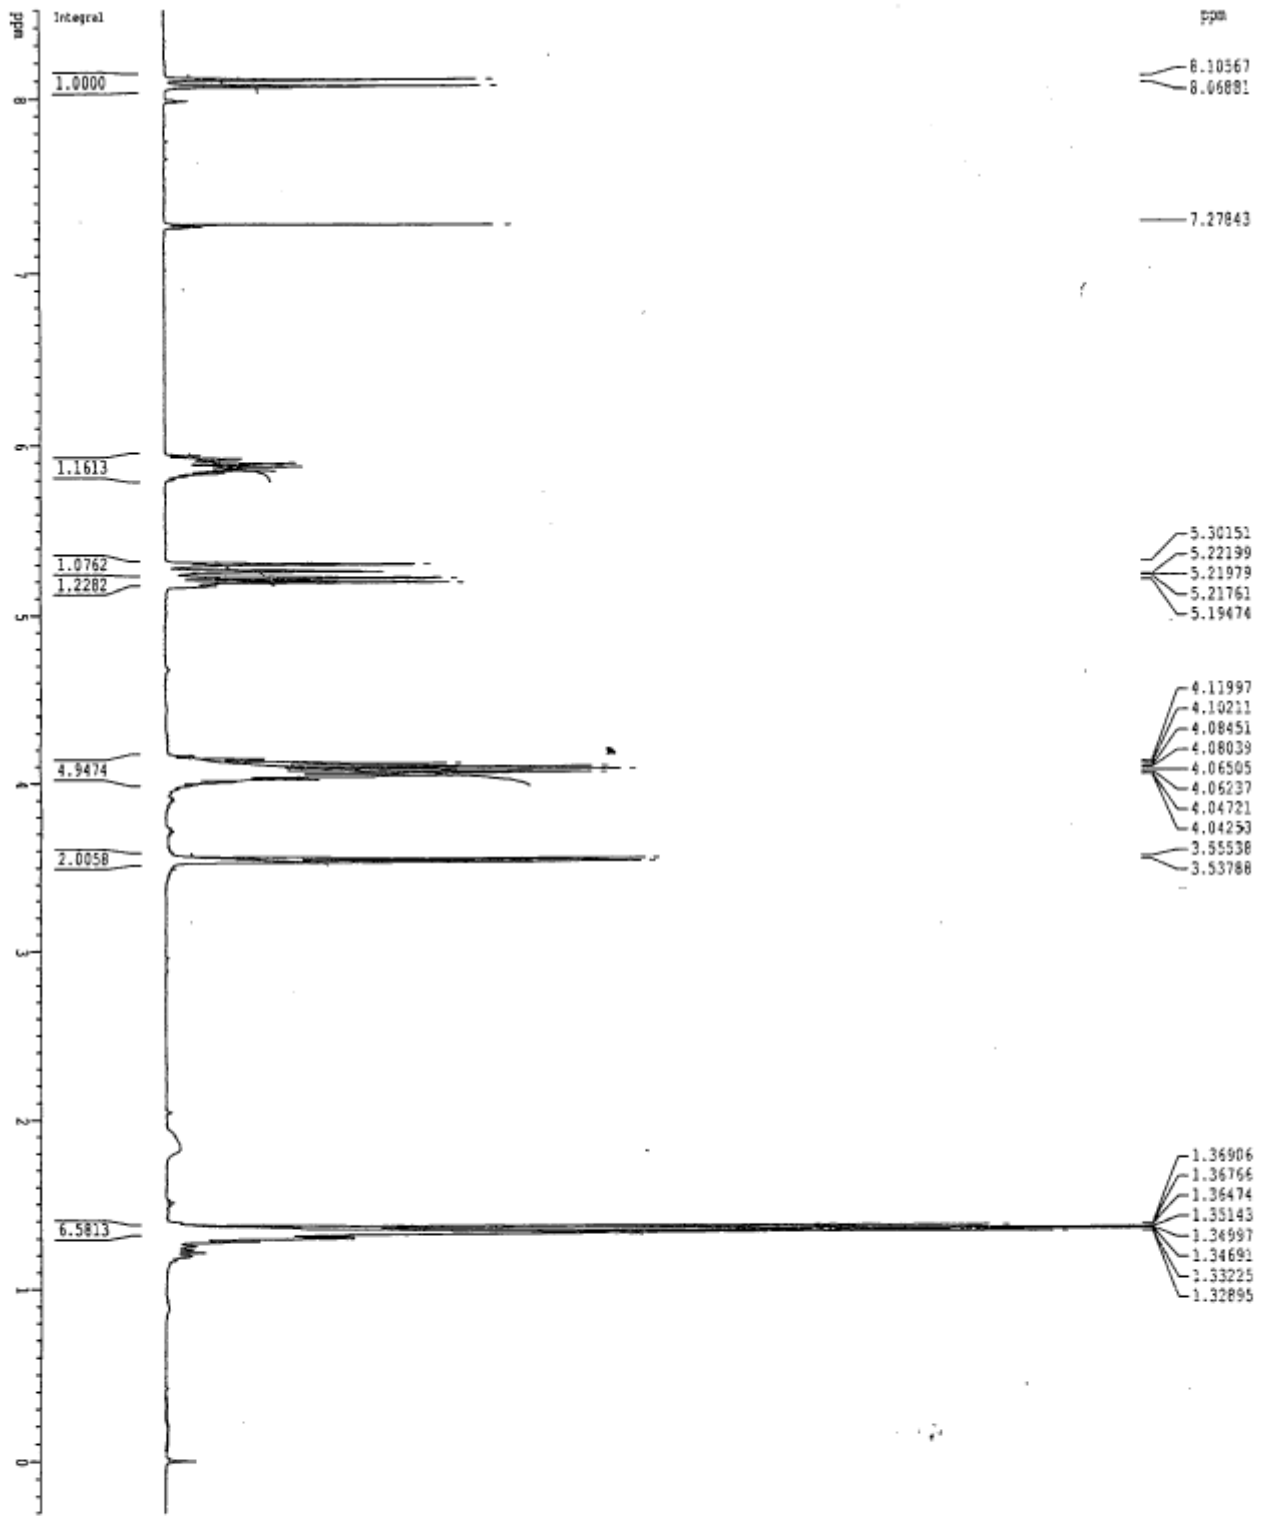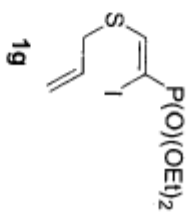

Current Data Parameters  
NAME: 01name1  
EXPNO: 341  
PROCNO: 1

F2 - Acquisition Parameters  
Date\_ : 20021005  
Time : 1.00  
INSTRUM : spect  
PROBHD : 5 mm BBO 90-  
PULPROG : zg30  
TD : 65536  
SOLVENT : CDCl3  
NS : 16  
DS : 2  
SWH : 8759.825 Hz  
F2RES : 0.125898 Hz  
AQ : 1.9715116 sec  
RG : 256  
RG : 256  
DW : 96.600 usec  
DE : 6.00 usec  
TE : 300.2 K  
D1 : 1.00000000 sec

CHANNEL F1  
NUC1 : 1H  
P1 : 7.90 usec  
PL1 : -6.00 dB  
SFO1 : 400.1364710 MHz

F2 - Processing parameters  
SI : 32768  
SF : 400.136024 MHz  
WDW : EM  
SSB : 0  
LB : 6.30 Hz  
GB : 0  
PC : 1.00

1D NMR plot parameters  
CX : 30.00 cm  
F1P : 6.500 ppm  
F1 : 3401.10 Hz  
F2P : -6.300 ppm  
F2 : -120.04 Hz  
FREQ1 : 0.29933 ppm/cm  
FREQ2 : 117.37147 Hz/cm

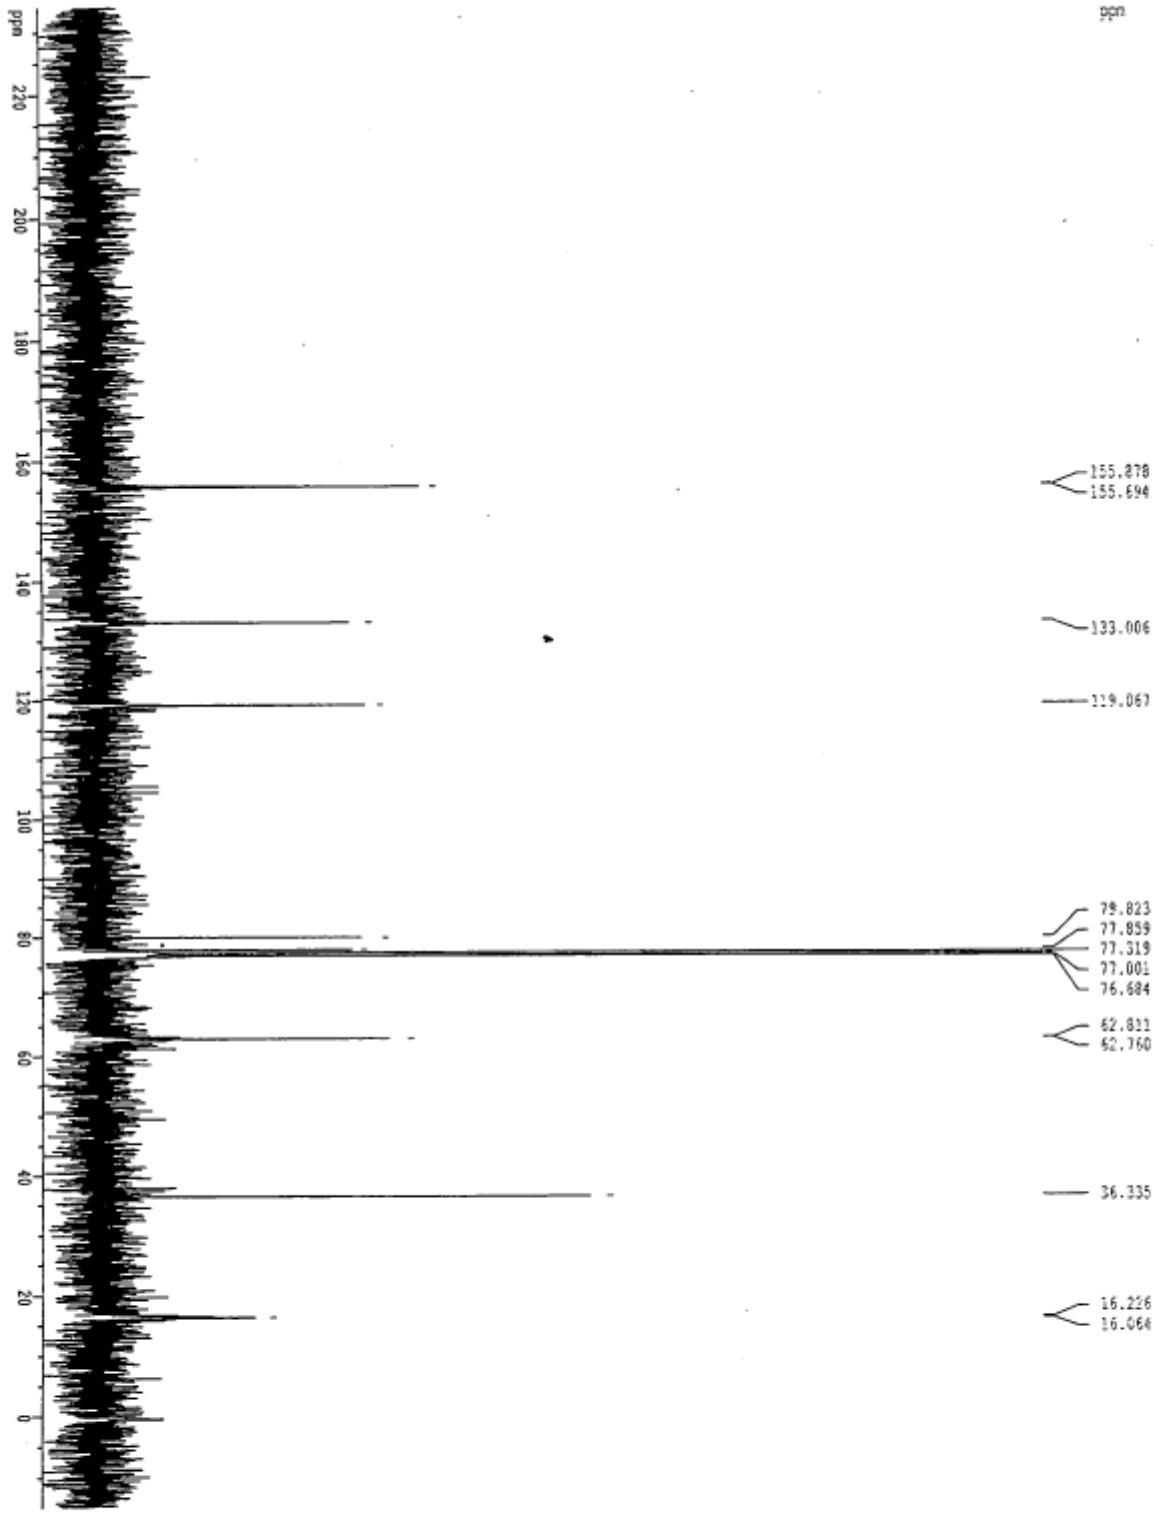

Current Data Parameters  
 NAME 03sgeno  
 EXPNO 3411  
 PROCNO 1

F2 - Acquisition Parameters  
 Date\_ 20021005  
 Time 1.33

INSTRUM dpx400  
 PROBHD 5 mm BBO BB-

PULPROG zgpg30  
 TD 65536

SOLVENT CDCl3  
 NS 512

DS 2  
 SWH 25062.656 Hz

FTIDRES 0.382426 Hz  
 AQ 1.3074932 sec

RG 3251  
 DM 19.950 usec

DE 6.00 usec  
 TE 300.0 K

D1 2.00000000 sec  
 d11 0.03000000 sec

----- CHANNEL f1 -----  
 NUCL1 13C  
 P1 7.90 usec  
 PL1 -2.00 dB  
 SFO1 100.6237959 MHz

----- CHANNEL f2 -----  
 CPROG2 waltz16  
 NUCL2 1H  
 PRCY2 80.00 usec  
 PL2 -6.00 dB  
 PL12 15.50 dB  
 SFO2 400.1316005 MHz

F2 - Processing parameters  
 SI 32768  
 SF 100.6127729 MHz  
 NQW EM  
 SSB 0  
 LB 1.00 Hz  
 GB 0  
 PC 1.40

1D NMR plot parameters  
 CX 30.00 cm  
 PIP 234.109 ppm  
 F1 23554.37 Hz  
 F2P -14.991 ppm  
 F2 -1508.29 Hz  
 PPMCM 8.30334 ppm/cm  
 HZCM 835.42188 Hz/cm

ppm

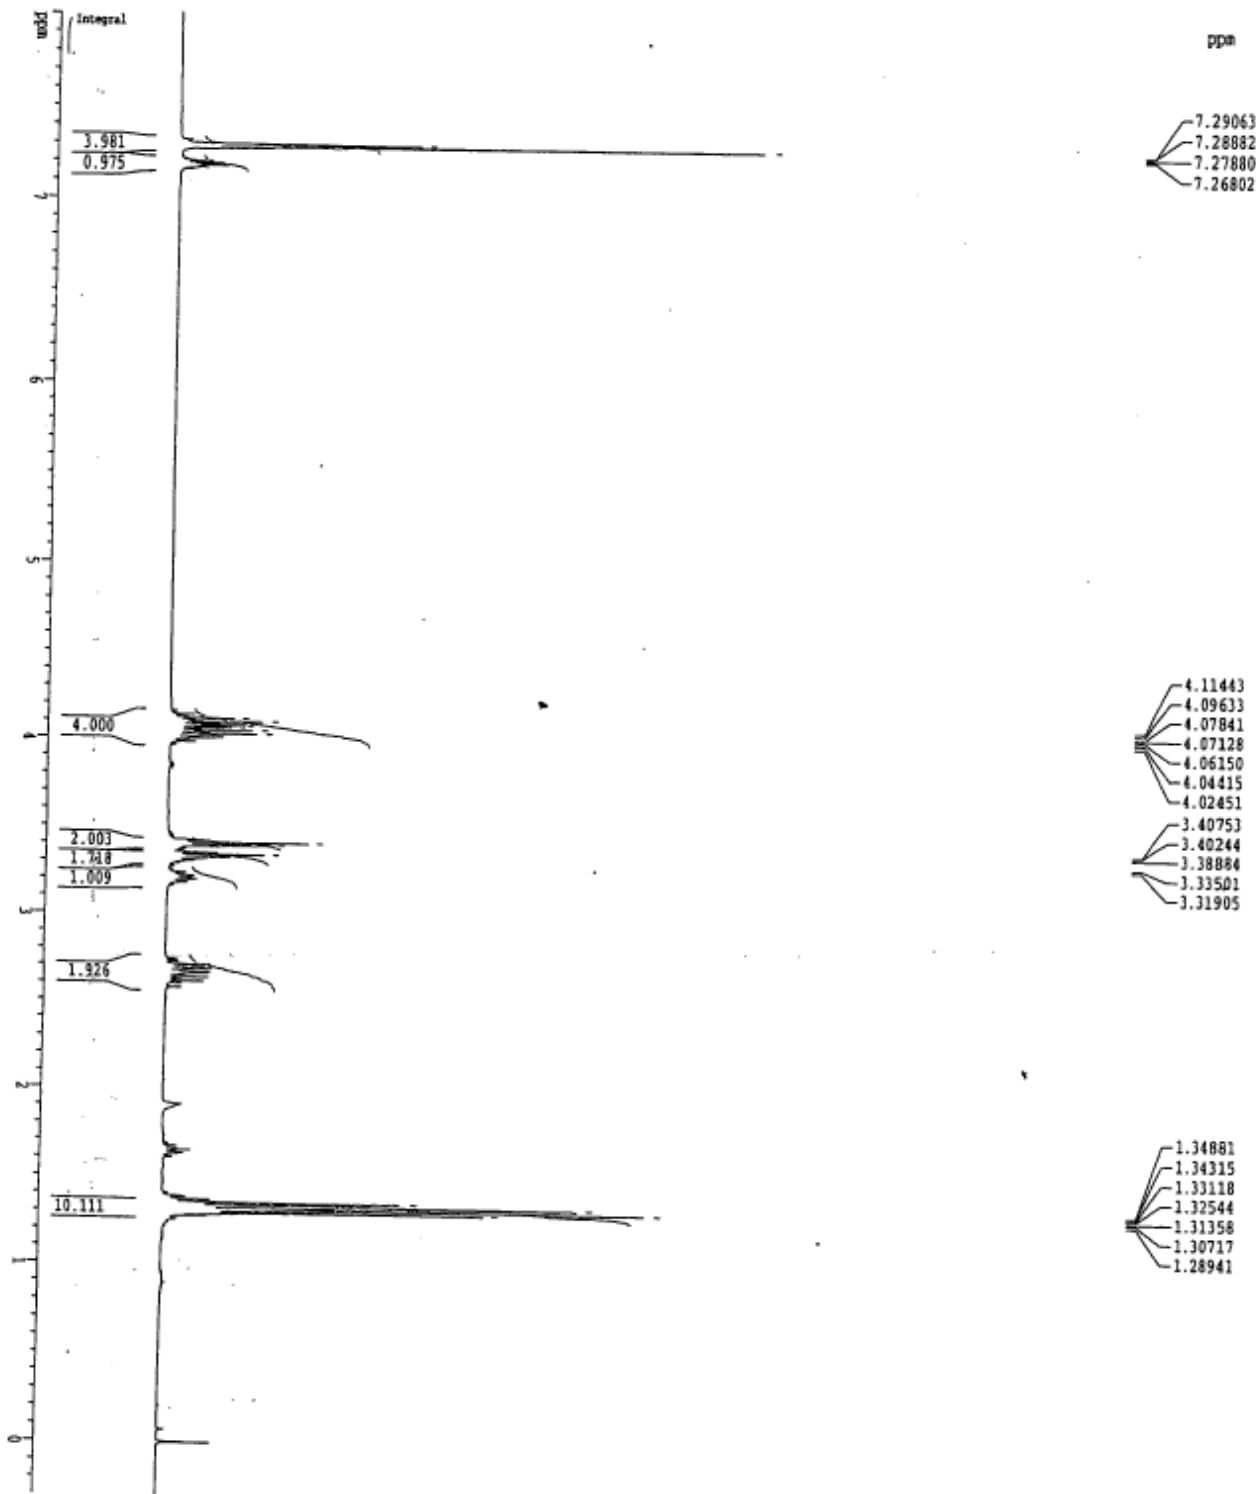

7.29063  
7.28882  
7.27880  
7.26802

4.11443  
4.09633  
4.07841  
4.07128  
4.06150  
4.04415  
4.02451  
3.40753  
3.40244  
3.38884  
3.33501  
3.31905

1.34881  
1.34315  
1.33118  
1.32544  
1.31358  
1.30717  
1.28941

Current Data Parameters  
NAME: 01name  
EXPNO: 1311  
PROCNO: 1

F2 - Acquisition Parameters  
Date\_: 20011022  
Time: 11.30  
INSTRUM: spect  
PROBHD: 5 mm BBO BB-  
PULPROG: zg30  
TD: 65536  
SOLVENT: CDCl3  
NS: 16  
DS: 2  
SWH: 8250.425 Hz  
FIDRES: 0.125889 Hz  
AQ: 1.9715116 sec  
RG: 128  
DQ: 60.450 usec  
DE: 6.00 usec  
TE: 300.2 K  
D1: 1.00000000 sec

\*\*\*\*\* CHANNEL f1 \*\*\*\*\*  
NUC1: 1H  
P1: 2.00 usec  
PL1: -0.00 dB  
SFO1: 400.1326700 MHz

F2 - Processing parameters  
SI: 32768  
SF: 400.1300900 MHz  
WDW: EM  
SSB: 0  
LB: 0.30 Hz  
GB: 0  
PC: 1.00

1D NMR plot parameters  
CX: 39.80 cm  
F2P: 6.000 ppm  
F1: 3281.04 Hz  
F2P: -0.100 ppm  
F1: -128.84 Hz  
FREQC: 0.27667 ppm/cm  
HZCM: 110.70264 Hz/cm

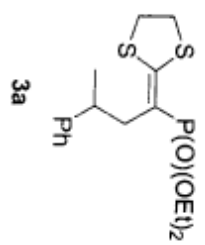

ppm

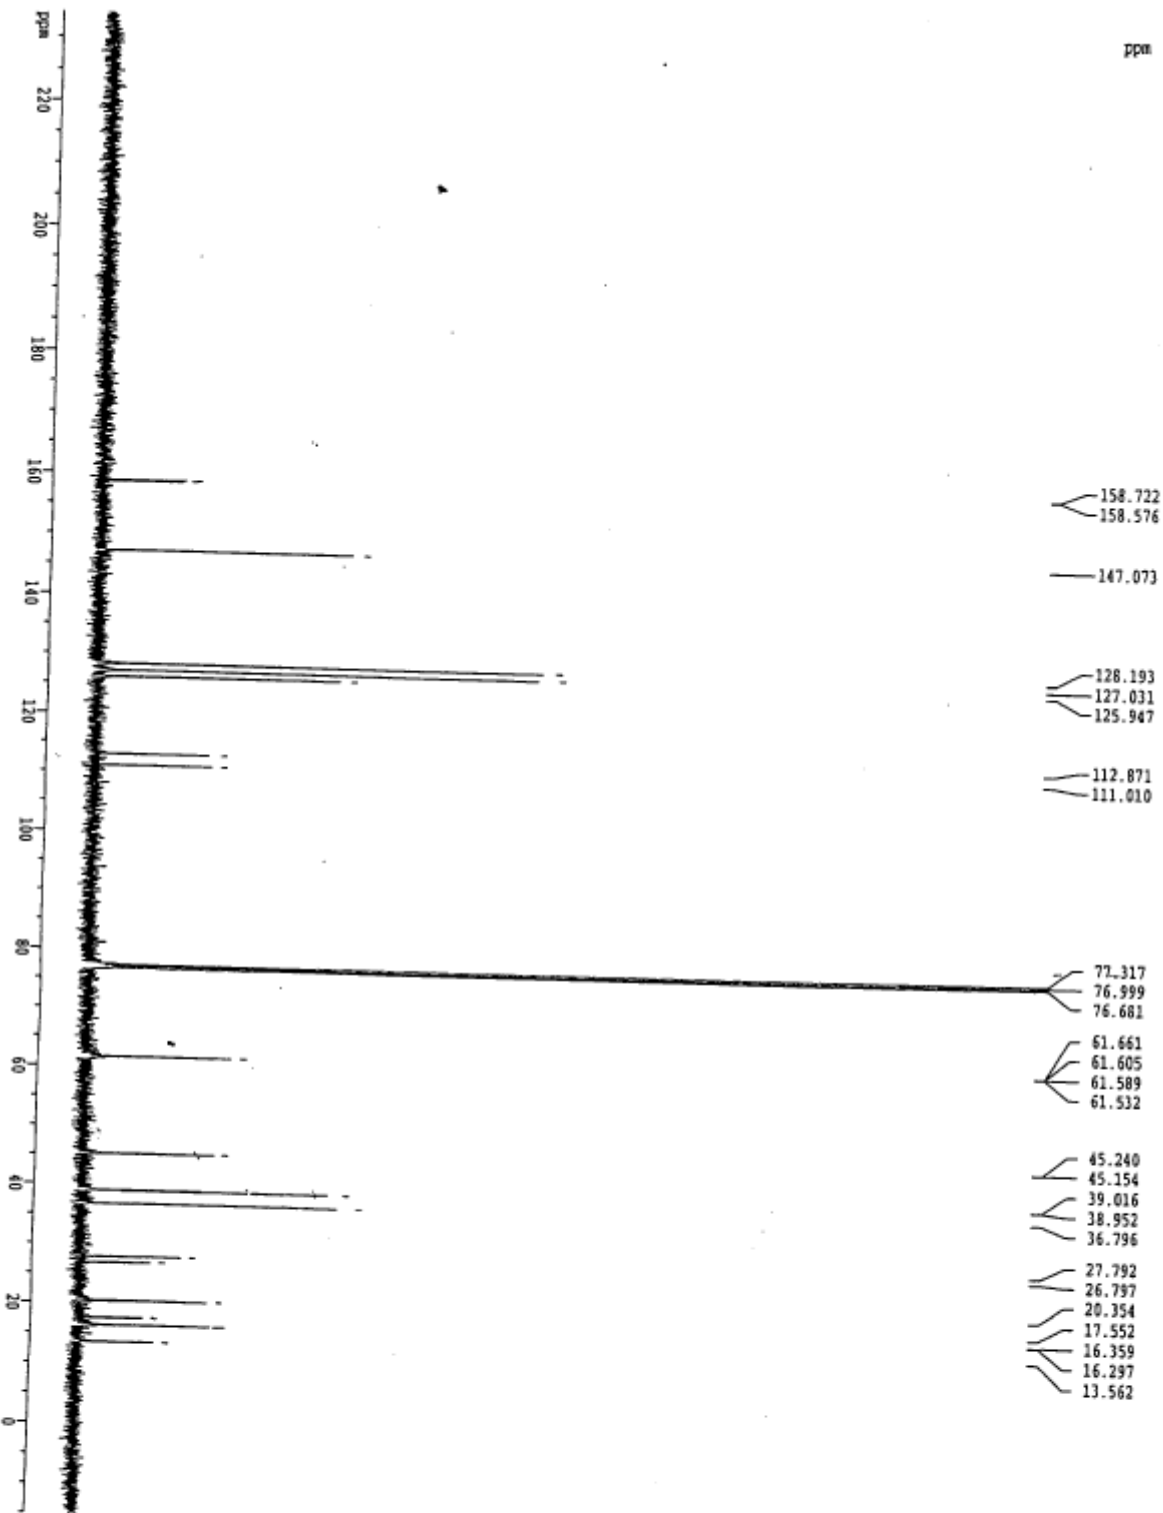

158.722  
158.576  
147.073  
128.193  
127.031  
125.947  
112.871  
111.010  
77.317  
76.999  
76.681  
61.661  
61.605  
61.589  
61.532  
45.240  
45.154  
39.016  
38.952  
36.796  
27.792  
26.797  
20.354  
17.552  
16.359  
16.297  
13.562

Current Data Parameters  
NAME 03agemo  
EXPERNO 1314  
PROCNO 1

F2 - Acquisition Parameters

Date\_ 20011022  
Time 13.13  
INSTRUM dpx400  
PROBHD 5 mm BBO BB-  
PULPROG zgpg30  
TD 65536  
SOLVENT CDCl3  
NS 1024  
DS 2  
SMH 25062.656 Hz  
FIDRES 0.382435 Hz  
AQ 1.3074932 sec  
RG 6502  
DE 19.950 usec  
DM 6.00 usec  
TE 300.0 K  
D1 2.00000000 sec  
d11 0.03000000 sec

\*\*\*\*\* CHANNEL F1 \*\*\*\*\*

NUC1 13C  
P1 7.90 usec  
PL1 -2.00 dB  
SFO1 100.6237959 MHz

\*\*\*\*\* CHANNEL F2 \*\*\*\*\*

CPDPRG2 waltz16  
NUC2 1H  
PCPD2 80.00 usec  
PL2 -6.00 dB  
PL12 15.50 dB  
SFO2 400.1316005 MHz

F2 - Processing parameters

SF 32768  
SF 100.6127759 MHz  
WDW RM  
SSB 0  
LB 1.00 Hz  
GB 0  
PC 1.40

ID NMR pilot parameters

CX 30.00 cm  
FIP 234.079 ppm  
F1 23551.31 Hz  
F2P -15.021 ppm  
F2 -1511.34 Hz  
PRVCD 8.30334 ppm/cm  
HZCN 835.42188 Hz/cm

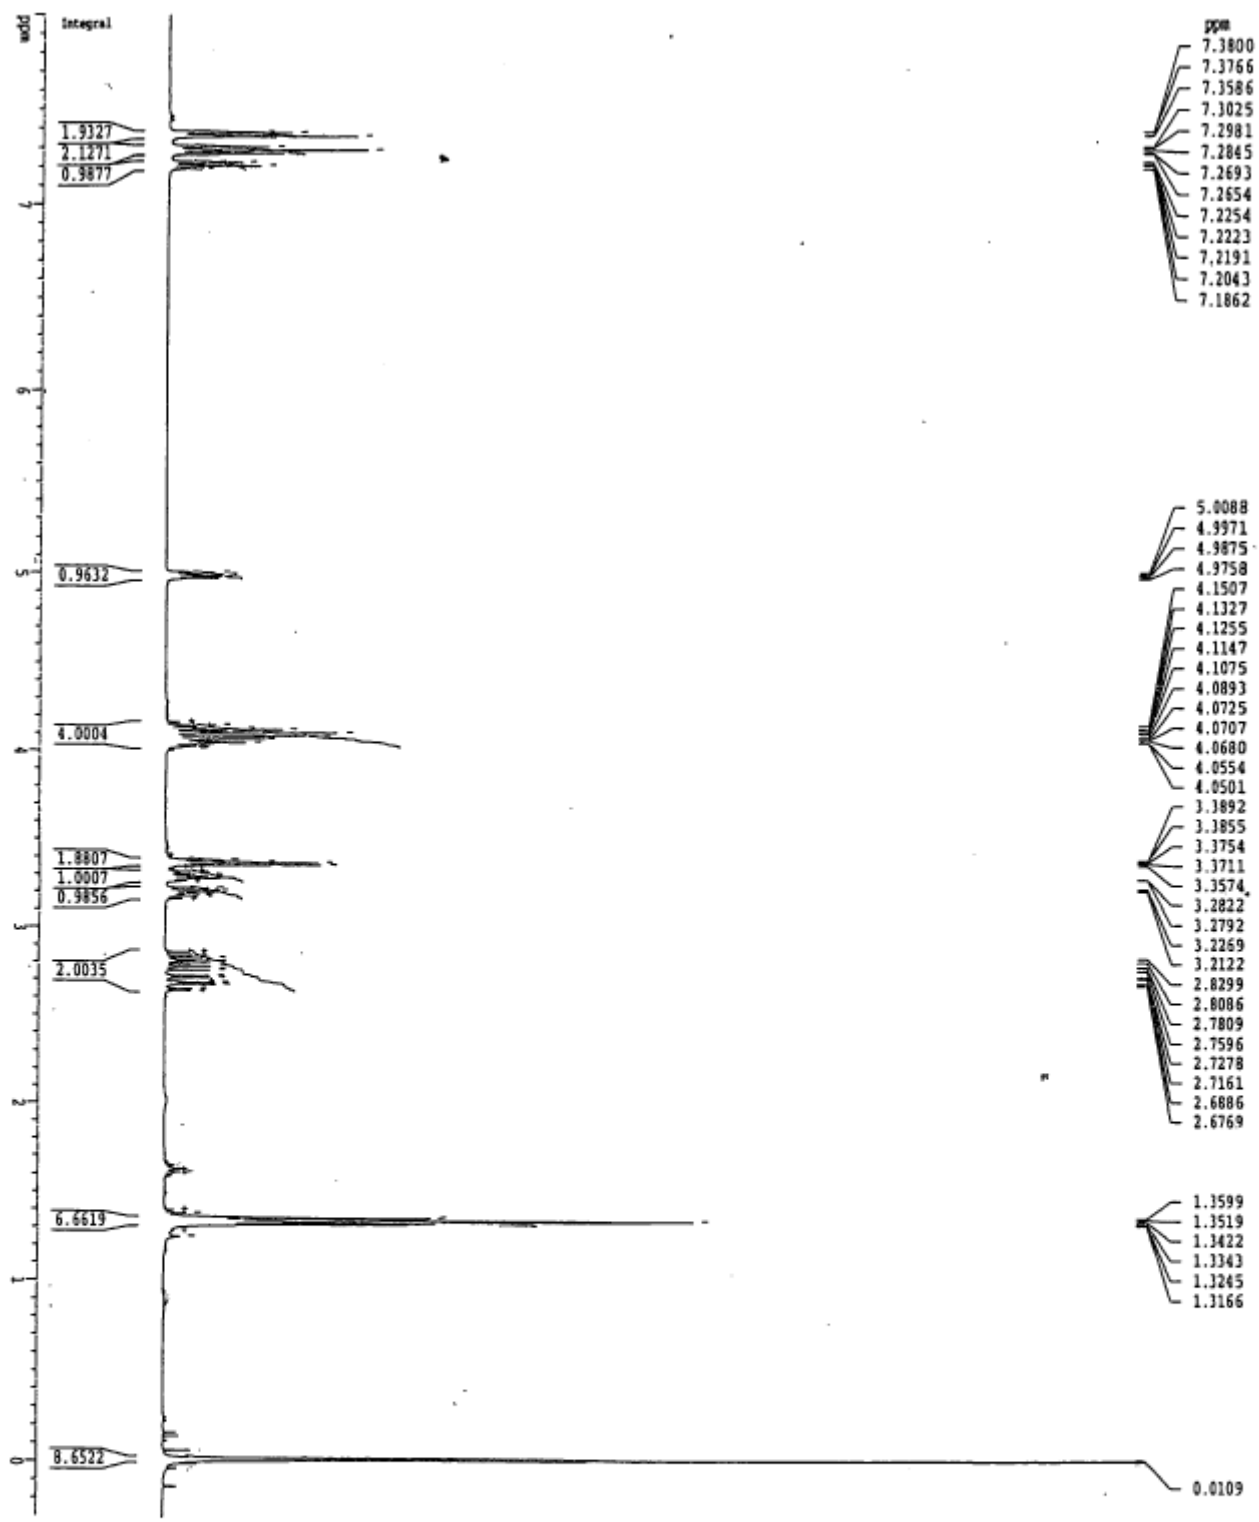

Current Data Parameters  
 Name: 3c  
 EXPNO: 1  
 PROCNO: 1  
 F2 - Acquisition Parameters  
 Date\_: 20220218  
 Time: 12:24  
 Instrument: spect  
 PROBRD: 5 mm BBO BB-  
 PULPROG: zgpg30  
 TD: 65536  
 TO: 0.00000000  
 SOLVENT: CDCl3  
 NS: 18  
 DS: 2  
 SWH: 8250.325 Hz  
 FWHM: 0.125898 Hz  
 AQ: 1.9715316 sec  
 RG: 90.5  
 DW: 60.50000000 sec  
 DE: 6.00000000  
 TE: 300.2 K  
 D1: 1.000000000 sec  
 ===== CHANNEL f1 =====  
 NUC1: 1H  
 P1: 1.00000000  
 PL1: -4.00000000  
 SFO1: 400.134710 MHz  
 F2 - Processing parameters  
 SI: 32768  
 SF: 400.1300559 MHz  
 WDW: EM  
 SSB: 0  
 LB: 0.20 Hz  
 GB: 0  
 PC: 1.00  
 1D NMR plot parameters  
 CX: 30.00 cm  
 CTX: 8.000 ppm  
 FT1: 3201.04 Hz  
 FZ1: -0.300 ppm  
 FT2: -120.04 Hz  
 FZ2: 0.21657 ppm/cm  
 HYPER: 110.10264 Hz/cm

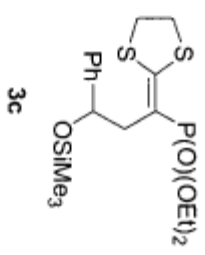

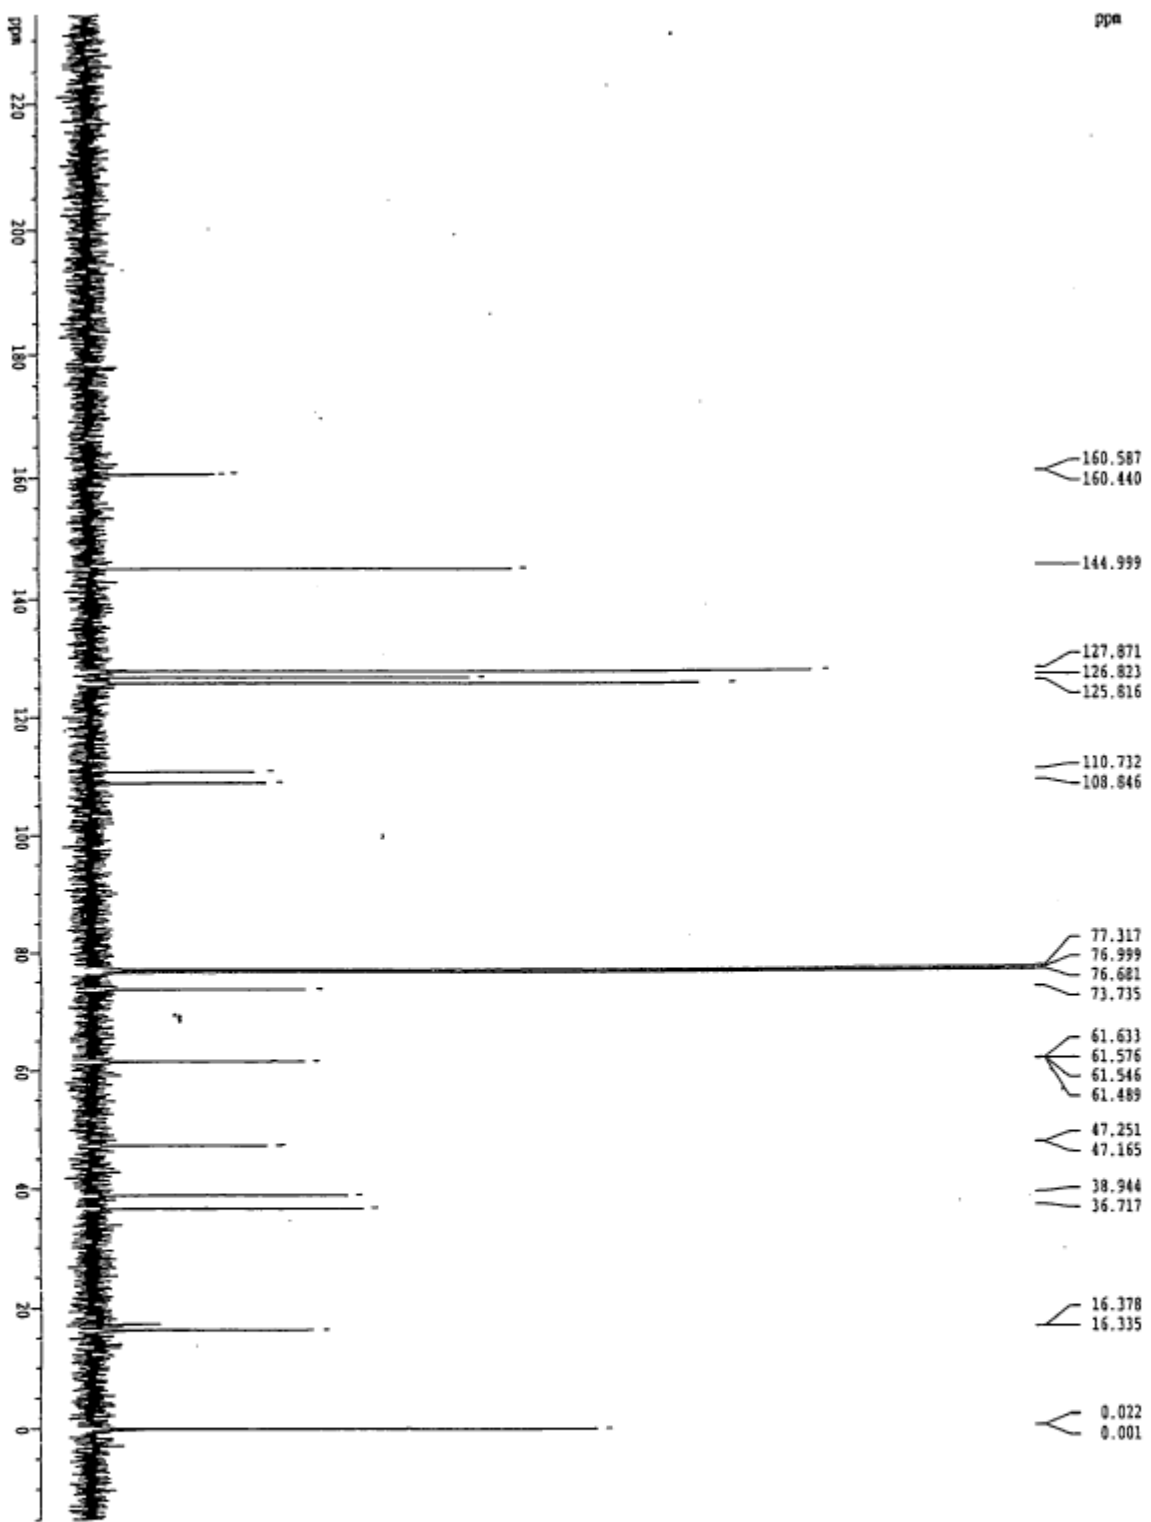

ppm

- 160.587
- 160.440
- 144.999
- 127.871
- 126.823
- 125.816
- 110.732
- 108.846
- 77.317
- 76.999
- 76.681
- 73.735
- 61.633
- 61.576
- 61.546
- 61.489
- 47.251
- 47.165
- 38.944
- 36.717
- 16.378
- 16.335
- 0.022
- 0.001

Current Data Parameters

NAME 0jagemo  
EXRNO 2146  
PROCNO 1

F2 - Acquisition Parameters

Date\_ 20020218  
Time 12.48  
INSTRUM dpx400  
PROBHD 5 mm BBO BB-  
PULPROG zgpg30  
TD 65536  
SOLVENT CDCl3  
NS 256  
DS 2  
SMH 25062.656 Hz  
FIDRES 0.382426 Hz  
AQ 1.3074932 sec  
RG 6502  
DM 19.950 usec  
DE 6.00 usec  
TE 300.0 K  
D1 2.00000000 sec  
d11 0.03000000 sec

\*\*\*\*\* CHANNEL F1 \*\*\*\*\*

MUCL 13c  
P1 7.90 usec  
PL -2.00 dB  
SFO1 100.6237959 MHz

\*\*\*\*\* CHANNEL F2 \*\*\*\*\*

CPROG2 waitz16  
NUC2 1H  
PCPD2 80.00 usec  
PL2 -6.00 dB  
PL12 15.50 dB  
SFO2 400.1316005 MHz

F2 - Processing Parameters  
SI 32768  
SF 100.6127767 MHz  
WDW EM  
SSB 0  
LB 1.00 Hz  
GB 0  
PC 1.40

1D NMR plot parameters

CX 30.00 cm  
FLP 234.071 DPM  
F1 23550.55 Hz  
F2P -15.029 DPM  
F2 -1512.11 Hz  
FREQM 8.30334 DPM/cm  
HZCM 835.42194 Hz/cm





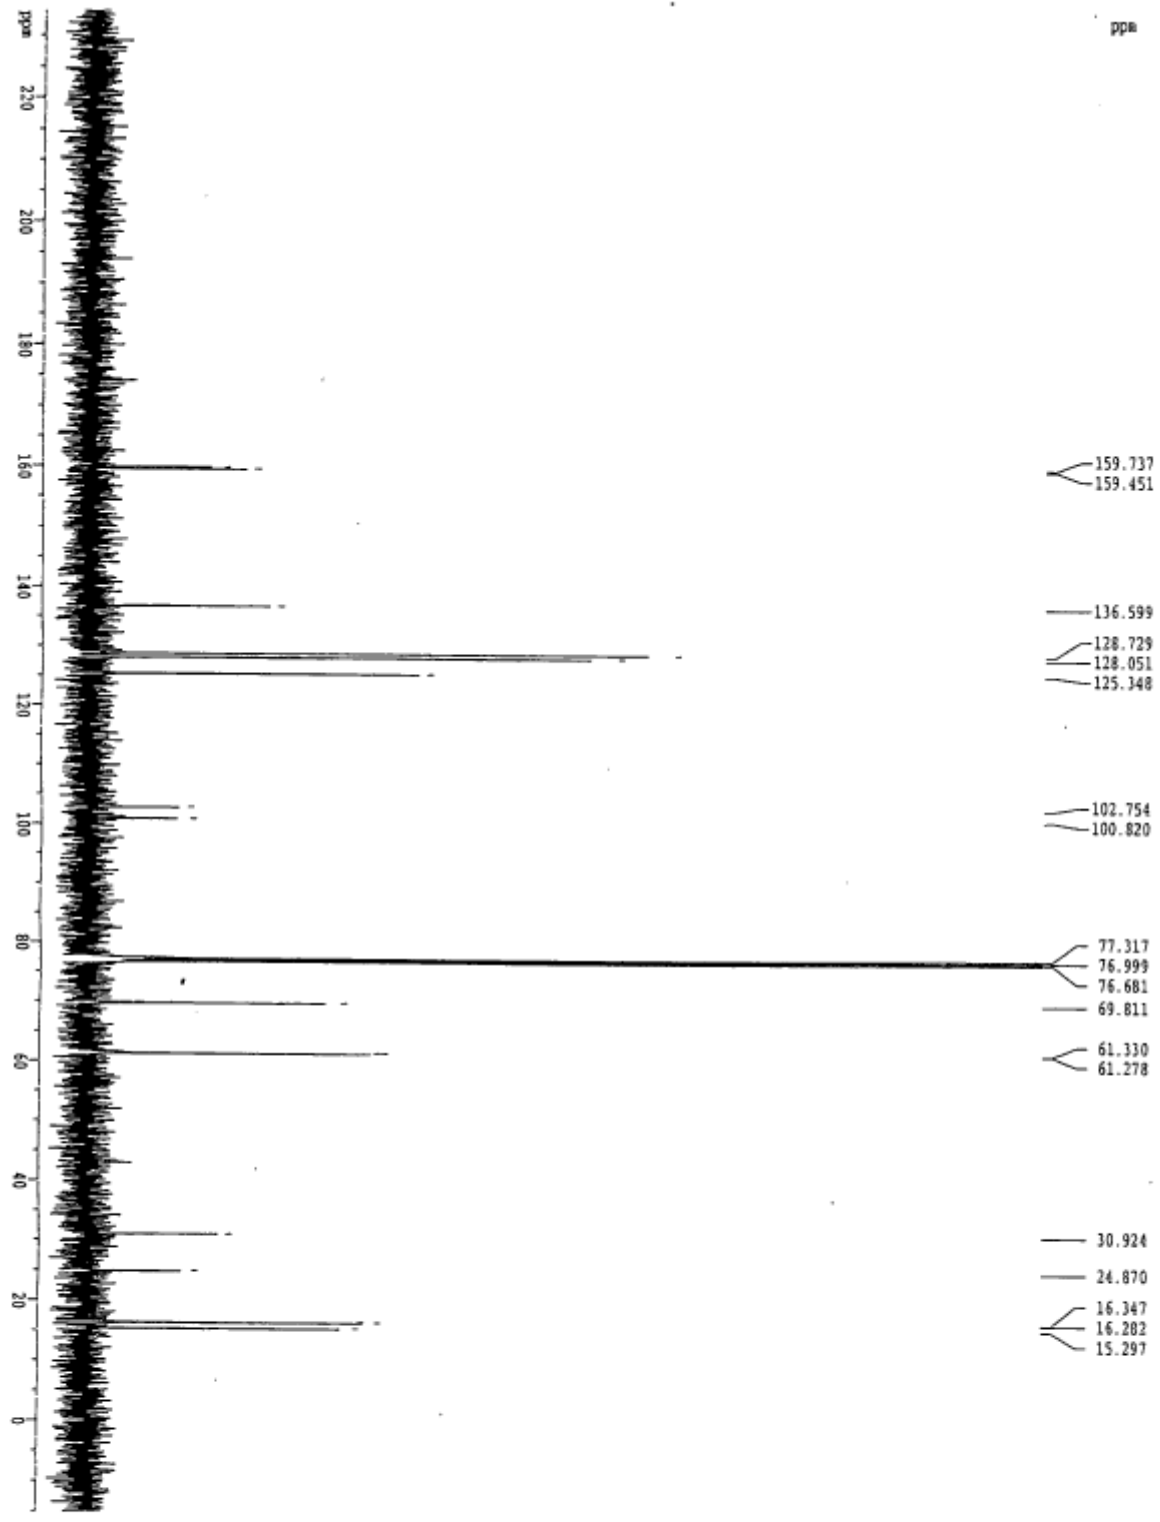

ppm

159.737  
159.451  
136.599  
128.729  
128.051  
125.348  
102.754  
100.820  
77.317  
76.999  
76.681  
69.811  
61.330  
61.278  
30.924  
24.870  
16.347  
16.202  
15.297

Current Data Parameters  
NAME OJasemo  
EXPNO 1748  
PROCNO 1

F2 - Acquisition Parameters  
Date\_ 20020119  
Time 17.12

INSTRUM dpw400  
PROBHD 5 mm BBO BB-  
PULPROG zgpg30  
TD 65536  
SOLVENT CDCl3  
NS 256  
DS 2  
SMH 25062.656 Hz  
FTRES 0.382428 Hz  
AQ 1.3074932 sec  
RG 7238.2  
DM 19.950 usec  
DE 6.00 usec  
TE 300.0 K  
D1 2.000000000 sec  
d11 0.030000000 sec

\*\*\*\*\* CHANNEL F1 \*\*\*\*\*  
NUC1 13C  
P1 7.90 usec  
PL1 -2.00 dB  
SFO1 100.6237959 MHz

\*\*\*\*\* CHANNEL F2 \*\*\*\*\*  
CPDPRG2 waltz16  
NUC2 1H  
PCPD2 80.00 usec  
PL2 -8.00 dB  
PL12 15.50 dB  
SFO2 400.1316005 MHz

F2 - Processing parameters  
SI 32768  
SF 100.6127744 MHz  
WFM EN  
SSB 0  
LB 1.00 Hz  
GB 0  
PC 1.40

ID NMR plot parameters  
CX 30.00 cm  
FLP 234.094 ppm  
F1 23552.84 Hz  
F2P -15.006 ppm  
F2 -1509.81 Hz  
FREQ 8.30334 ppm/cm  
HZCM 835.42188 Hz/cm

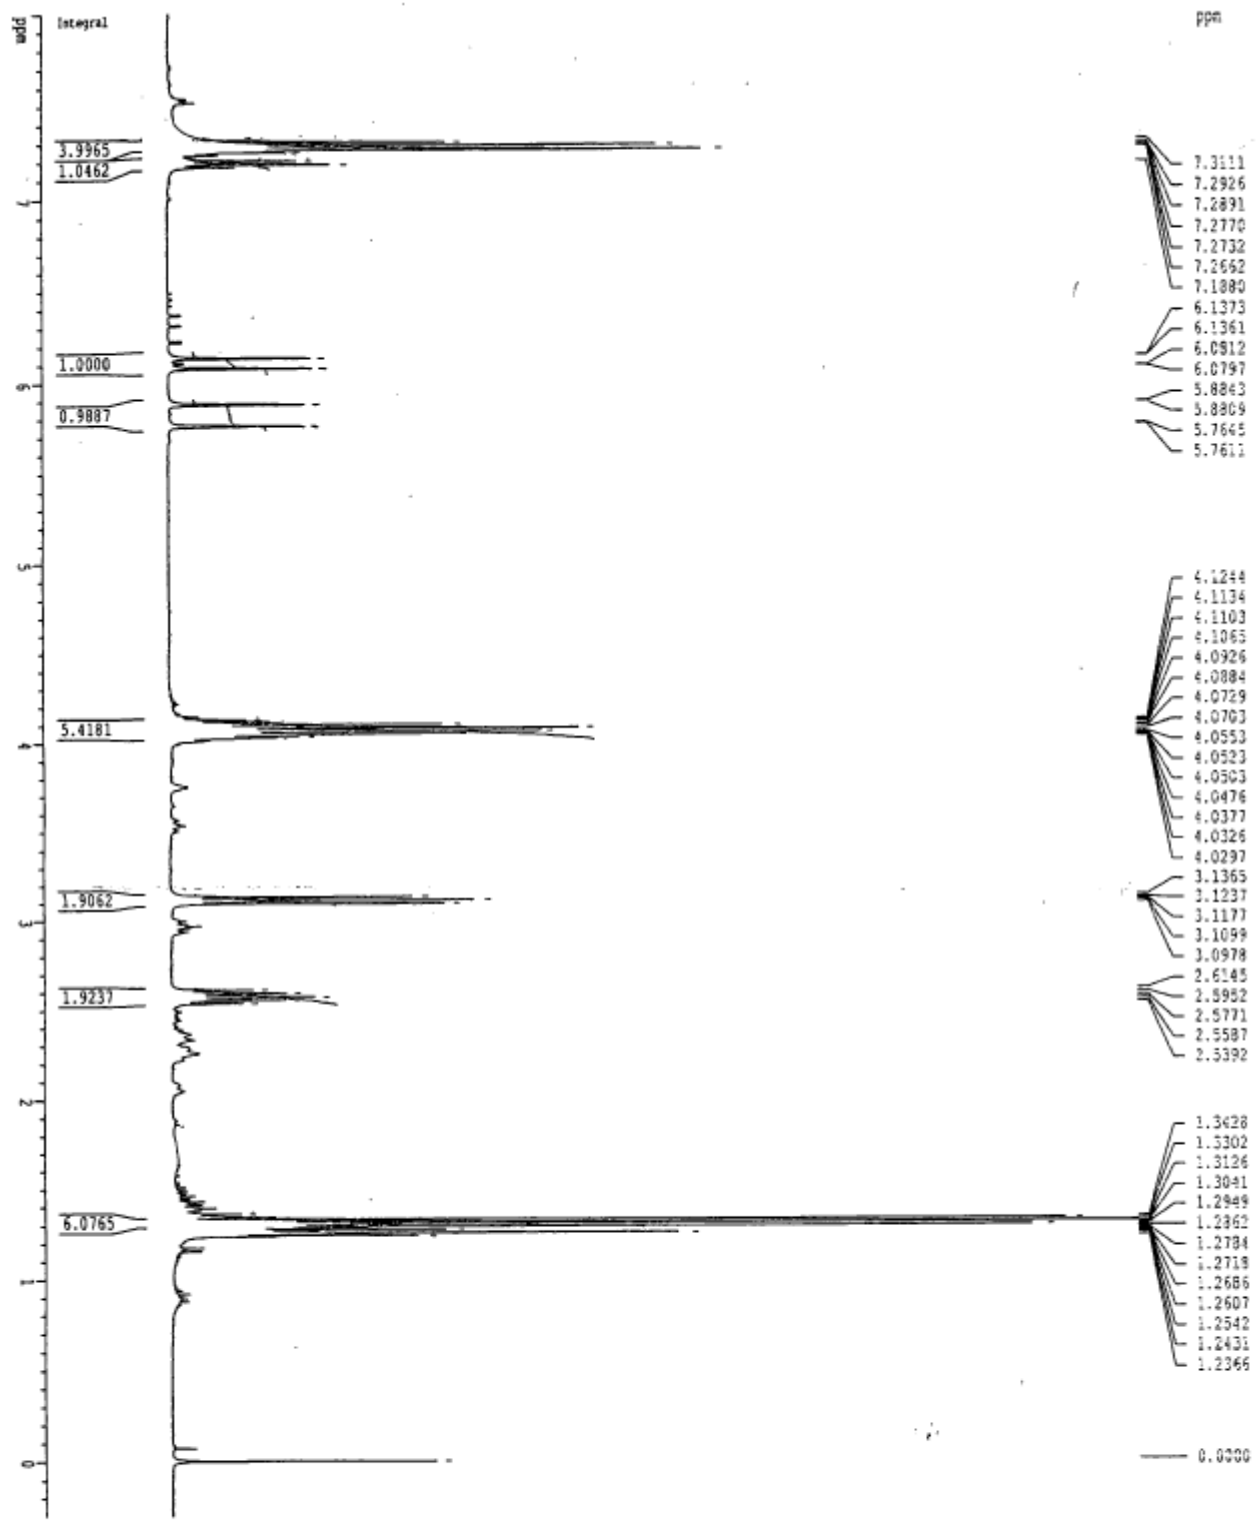

Current Data Parameters  
 Name: 03spno  
 EXPNO: 413  
 PROCNO: 1

F2 - Acquisition Parameters  
 Date\_: 20/08/17  
 Time: 15.01  
 INSTRUM: spect  
 PROBRD: 5 mm BBO 80-  
 PULPROG: zgpg30  
 TD: 65536  
 SOLVENT: CDCl3  
 NS: 16  
 DS: 2  
 SWH: 8250.823 Hz  
 FIDRES: 0.128898 Hz  
 AQ: 3.9715315 sec  
 RG: 2631.2  
 SN: 60.460 urec  
 SC: 6.00 urec  
 TC: 100.0 K  
 D1: 1.00000000 sec

CHANNEL f1  
 NUC1: 1H  
 P1: 15.00 urec  
 PL1: -5.00 dB  
 SFO1: 400.1324110 MHz

F2 - Processing parameters  
 SI: 32768  
 SF: 400.1309411 MHz  
 WDM: EN  
 SSB: 0  
 LB: 0.30 Hz  
 GB: 0  
 PC: 1.00

1D NMR plot parameters  
 CX: 37.00 cm  
 CY: 2.000 ppm  
 F1P: 281.000 Hz  
 F1: 281.000 Hz  
 F2P: -10.000 Hz  
 F2: -10.000 Hz  
 FREQM: 0.21861 spect/cm  
 NUCL1: 1H  
 NUCL2: 13C

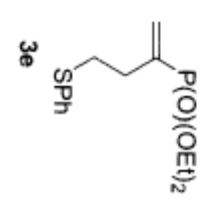

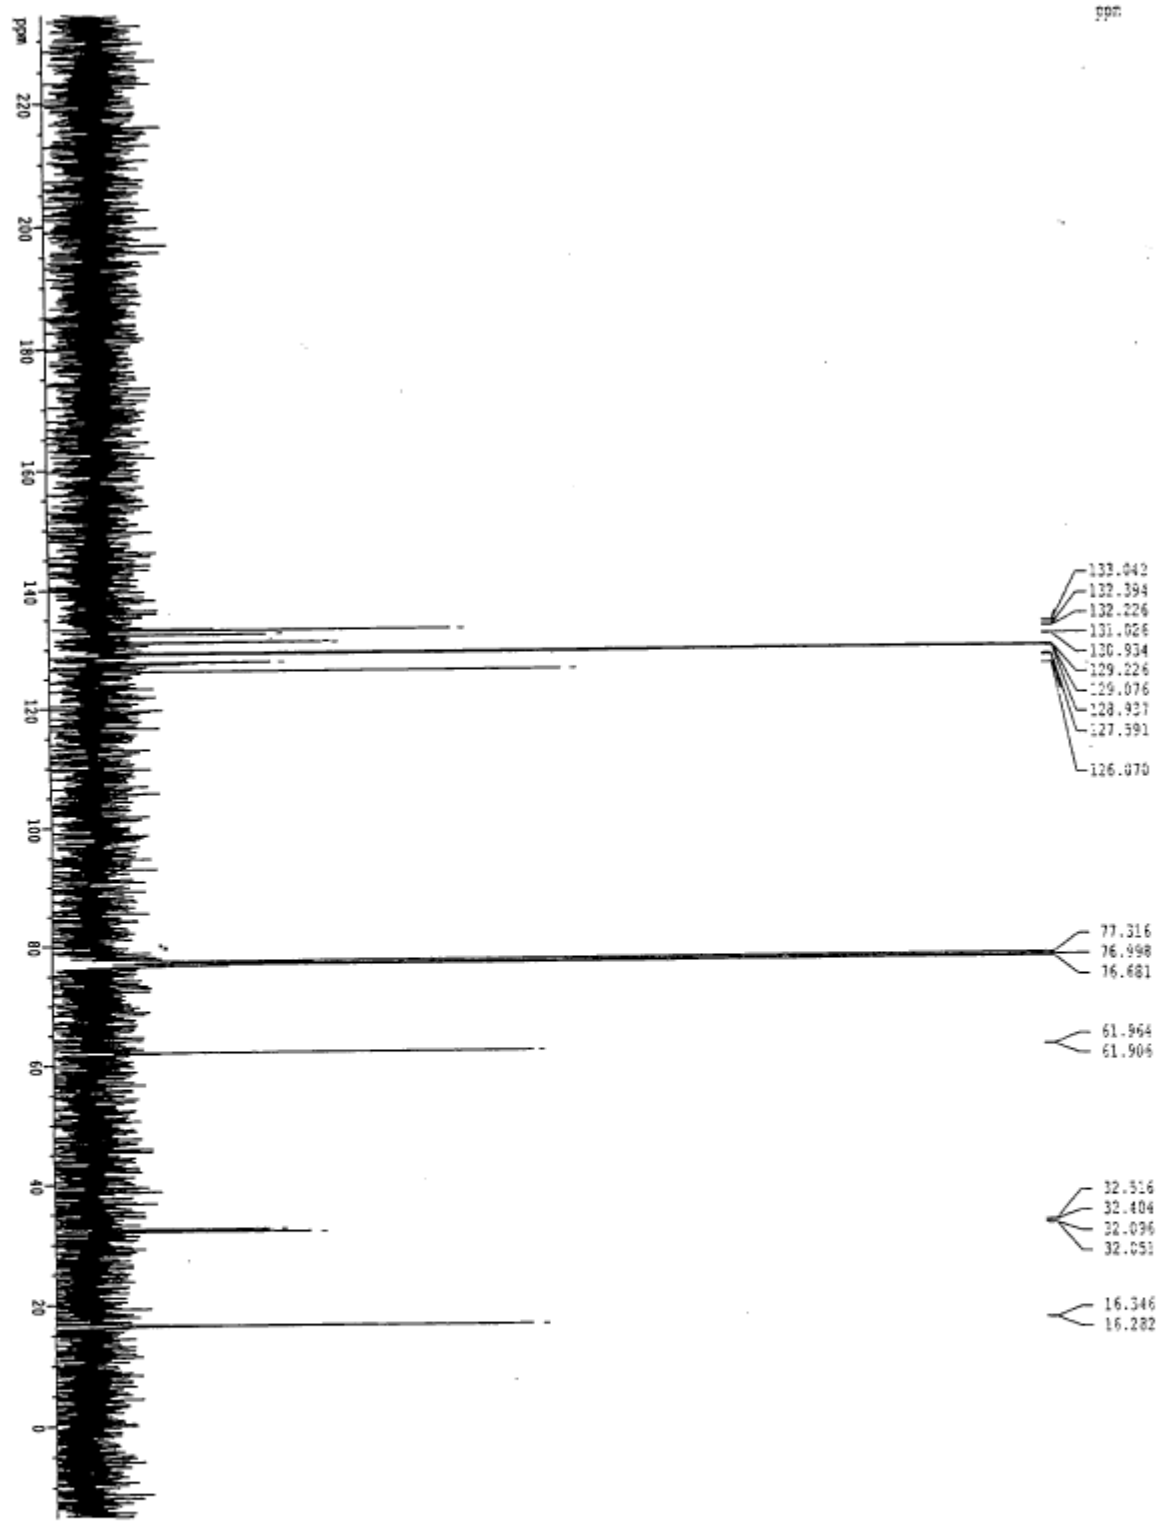

Current Data Parameters  
 NAME 03sgeno  
 EXPNO 4831  
 PROCNO 1

F2 - Acquisition Parameters  
 Date\_ 20030619  
 Time 16.33  
 INSTRUM dpx400  
 PROBRD 5 mm BBO BB-  
 PULPROG zgpg30  
 TD 65536  
 SOLVENT CDCl3  
 NS 512  
 DS 2  
 SMH 25062.656 Hz  
 FIDRES 0.382426 Hz  
 AQ 1.3074932 sec  
 RG 6502  
 DW 19.950 usec  
 DE 6.00 usec  
 TE 300.0 K  
 D1 2.00000000 sec  
 d11 0.03000000 sec

CHANNEL F1 -----  
 NUCL1 13C  
 P1 7.90 usec  
 PL1 -2.00 dB  
 SFO1 100.6237959 MHz

CHANNEL F2 -----  
 CPDPRG2 waltz16  
 NUCL2 1H  
 PCPD2 80.00 usec  
 PL2 -6.00 dB  
 PLI2 10.00 dB  
 SFO2 400.1316905 MHz

F2 - Processing parameters  
 SI 32768  
 SF 100.6127721 MHz  
 KWDI EM  
 SSB 0  
 LB 1.00 Hz  
 GB 0  
 PC 1.40

ID NMR plot parameters  
 CX 30.00 cm  
 F1P 234.117 ppm  
 F1 2355.14 Hz  
 F2P -14.983 ppm  
 F2 -1507.52 Hz  
 PPMCM 8.30334 ppm/cm  
 HZCM 835.42188 Hz/cm

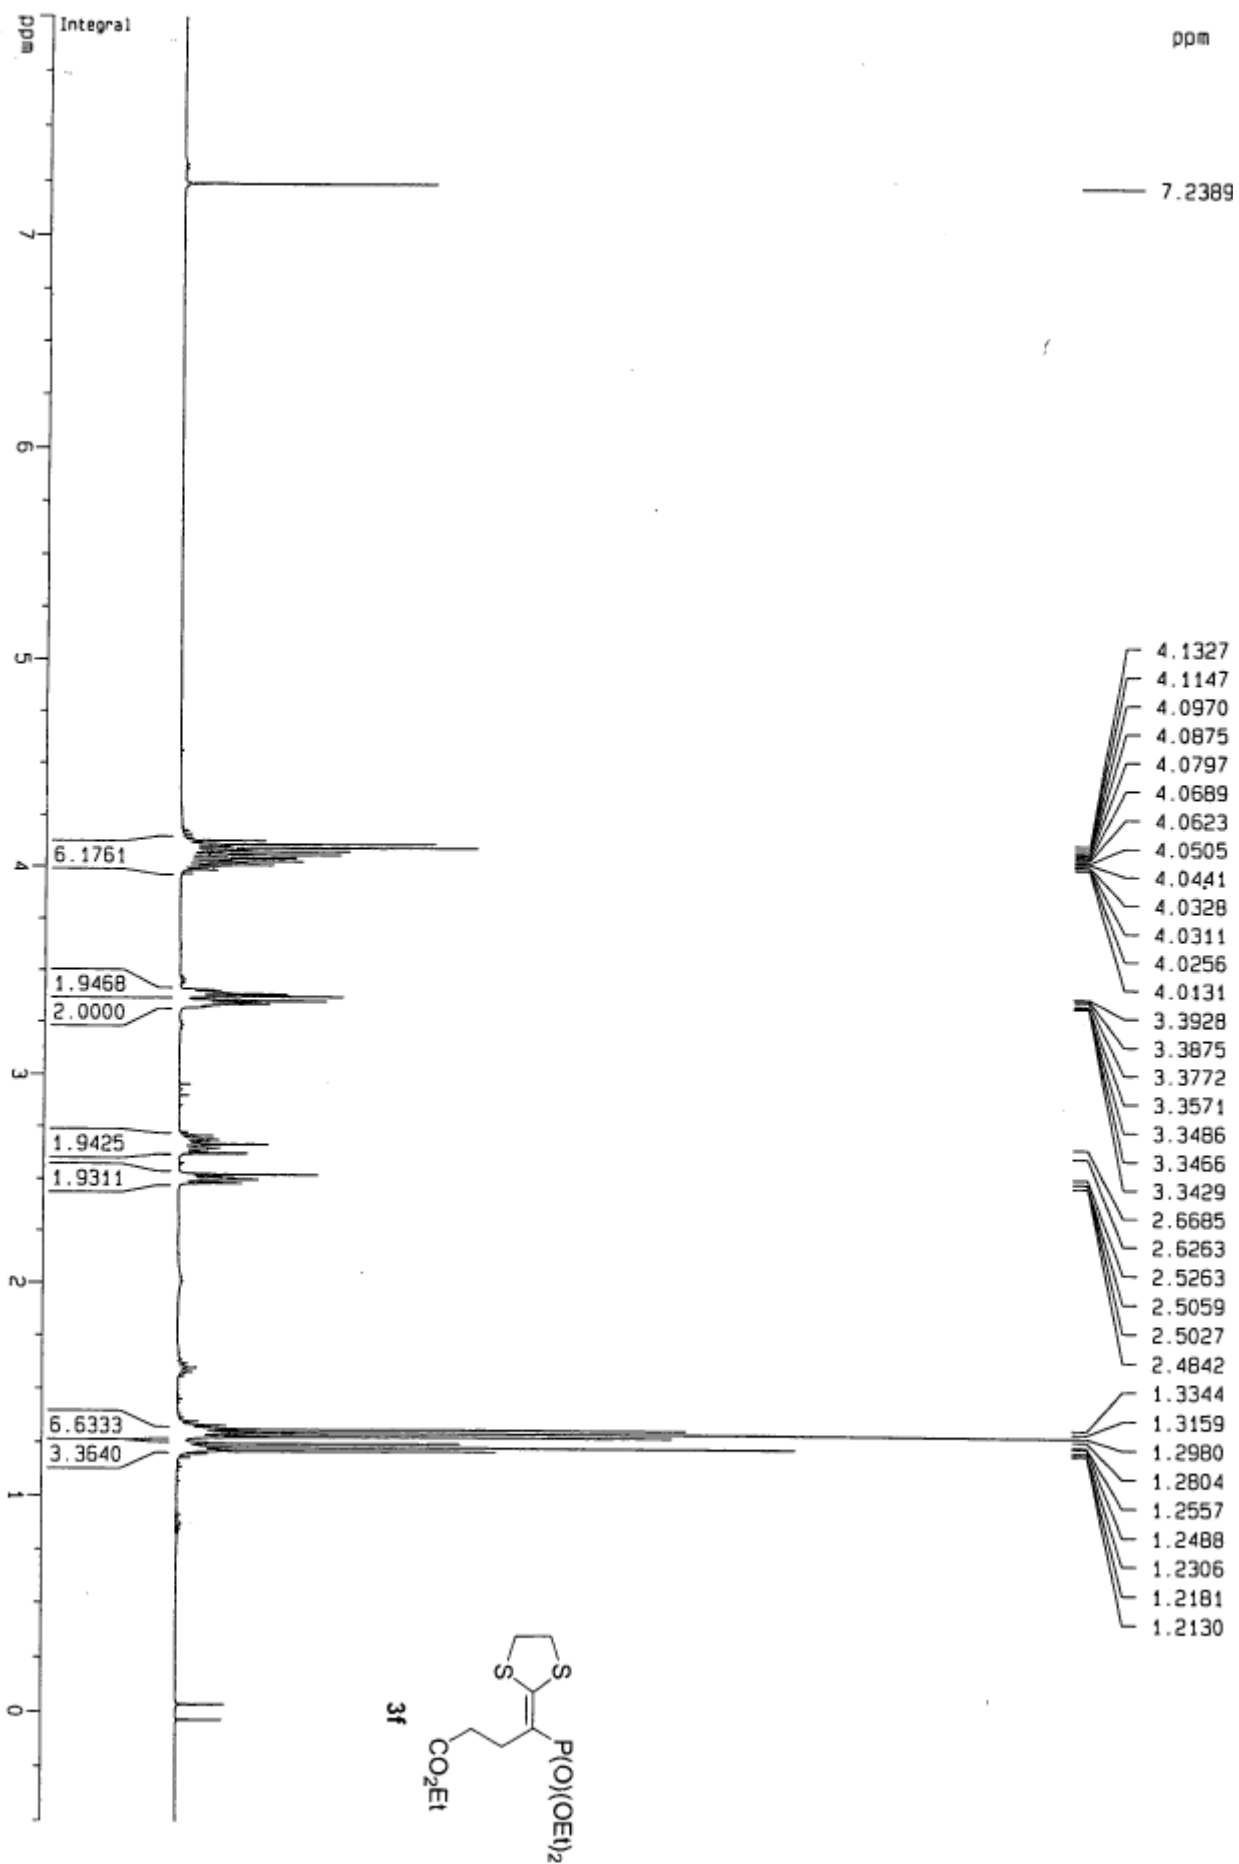

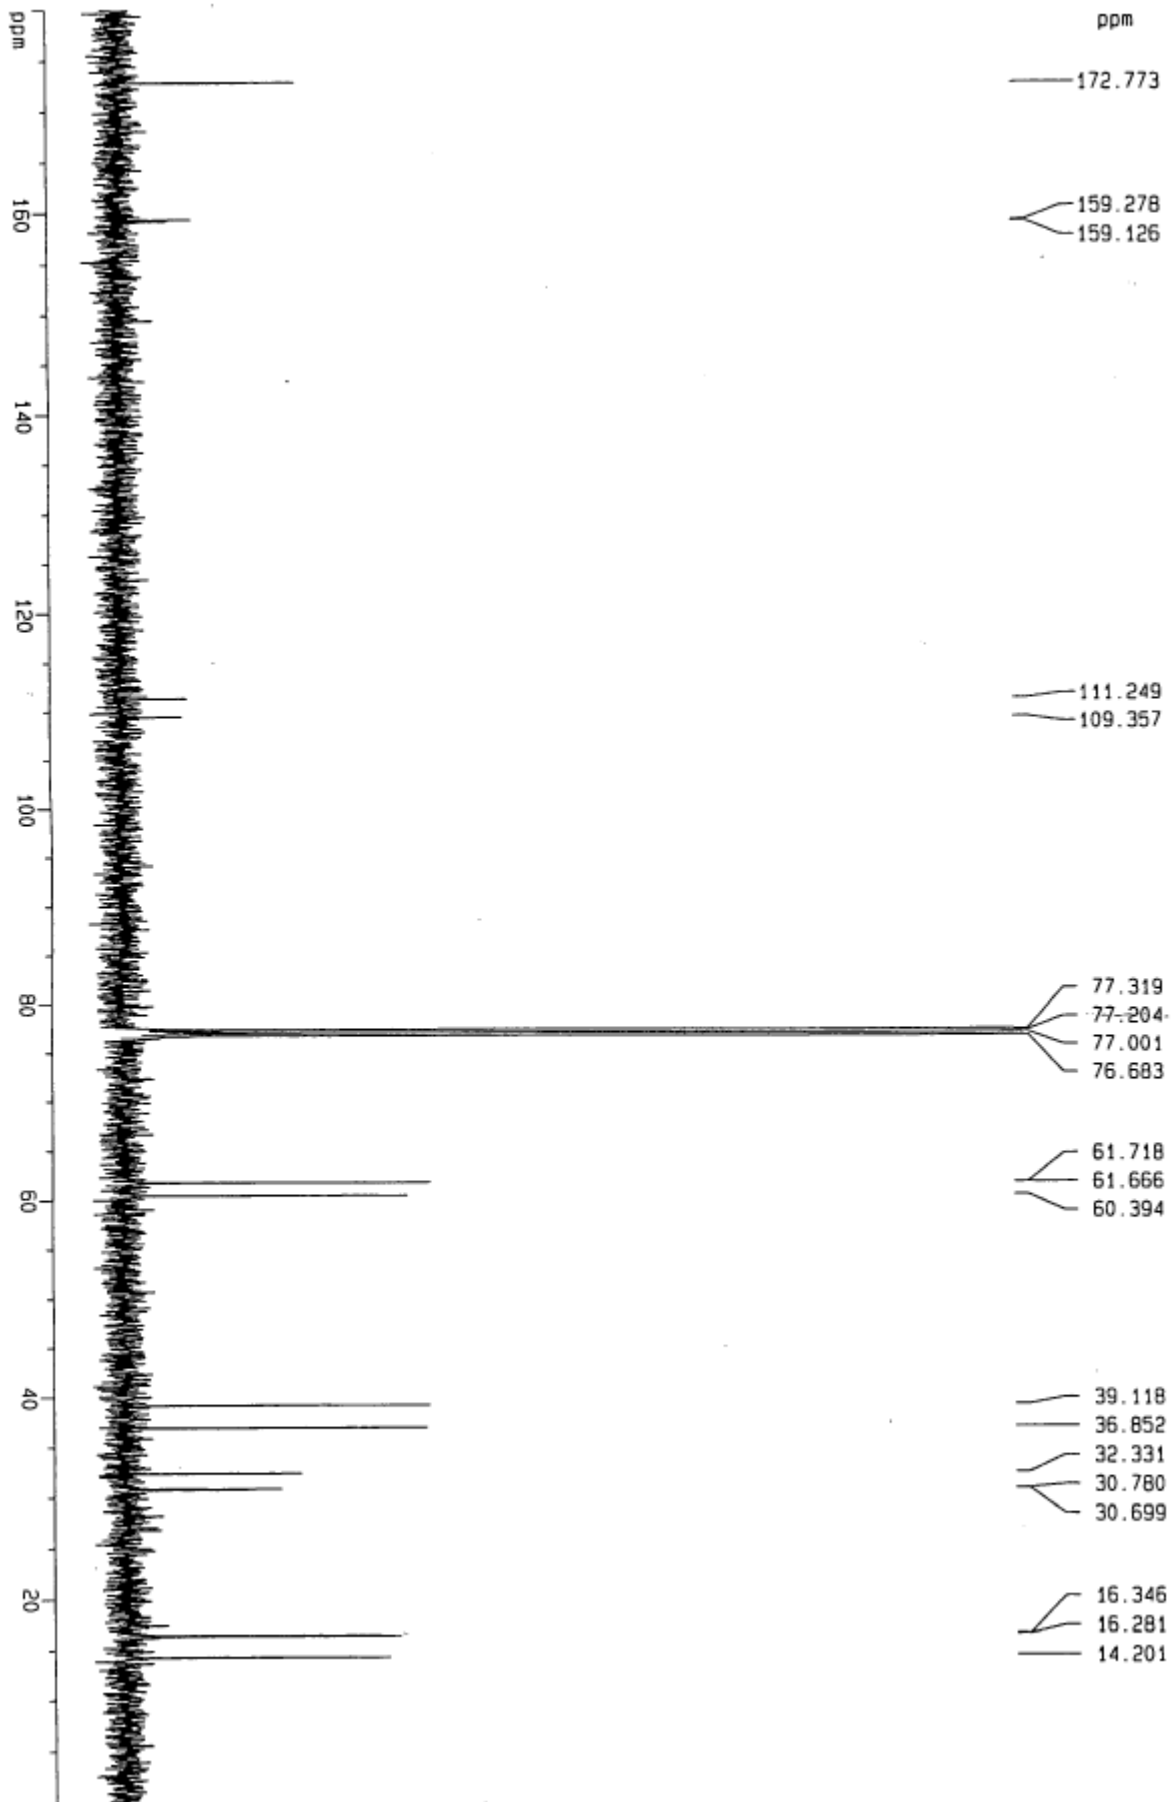



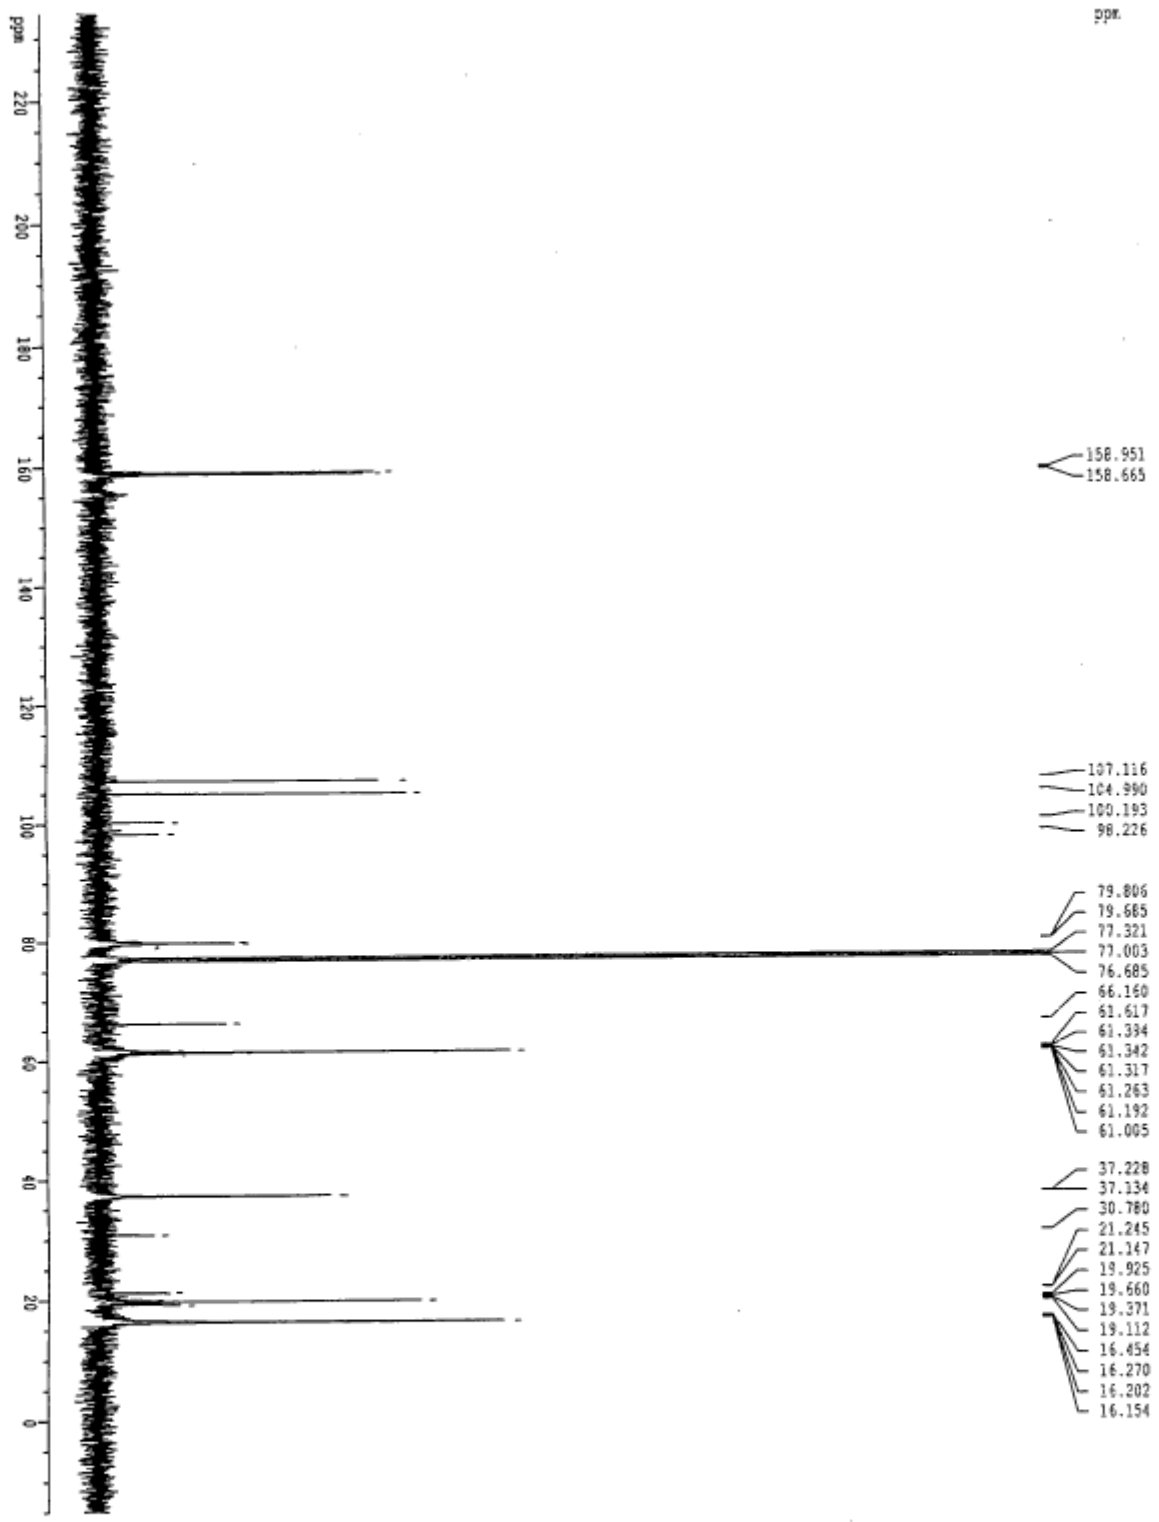

158.951  
158.665

107.116  
104.990  
100.193  
98.226

79.806  
79.685  
77.321  
77.003  
76.685  
66.160  
61.617  
61.334  
61.342  
61.317  
61.263  
61.192  
61.005

37.228  
37.134  
30.780  
21.245  
21.147  
19.925  
19.660  
19.371  
19.112  
16.454  
16.270  
16.202  
16.154

Current Data Parameters

NAME 03aemo  
EXPNO 4331  
PROCNO 1

F2 - Acquisition Parameters

Date\_ 20030317  
Time 15.36  
INSTRUM dpx400  
PROBHD 5 mm BBO Bb-  
PULPROG zgpg30  
TD 65536  
SOLVENT CDCl3  
NS 512  
DS 2  
SWH 25062.656 Hz  
FIDRES 0.382428 Hz  
AQ 1.3074932 sec  
RG 6502  
DW 19.950 usec  
DE 6.00 usec  
TE 300.0 K  
D1 2.00000000 sec  
d11 0.03000000 sec

CHANNEL F1

NUC1 13C  
P1 7.90 usec  
PL1 -2.00 dB  
SFO1 100.6237959 MHz

CHANNEL F2

CEPRPQ2 waltz16  
NUC2 1H  
PCPD2 80.00 usec  
PL2 -6.00 dB  
PL12 15.50 dB  
SFO2 400.1316005 MHz

F2 - Processing parameters

SI 32768  
SF 100.6127782 MHz  
WDW EM  
SSB 0  
LB 1.00 Hz  
GB 0  
PC 1.40

1D NMR plot parameters

CX 30.00 cm  
F1P 234.056 ppm  
F1 23549.02 Hz  
F2P -15.044 ppm  
F2 -1513.64 Hz  
FREQN 8.30334 ppm/cm  
HCHM 835.42188 Hz/cm



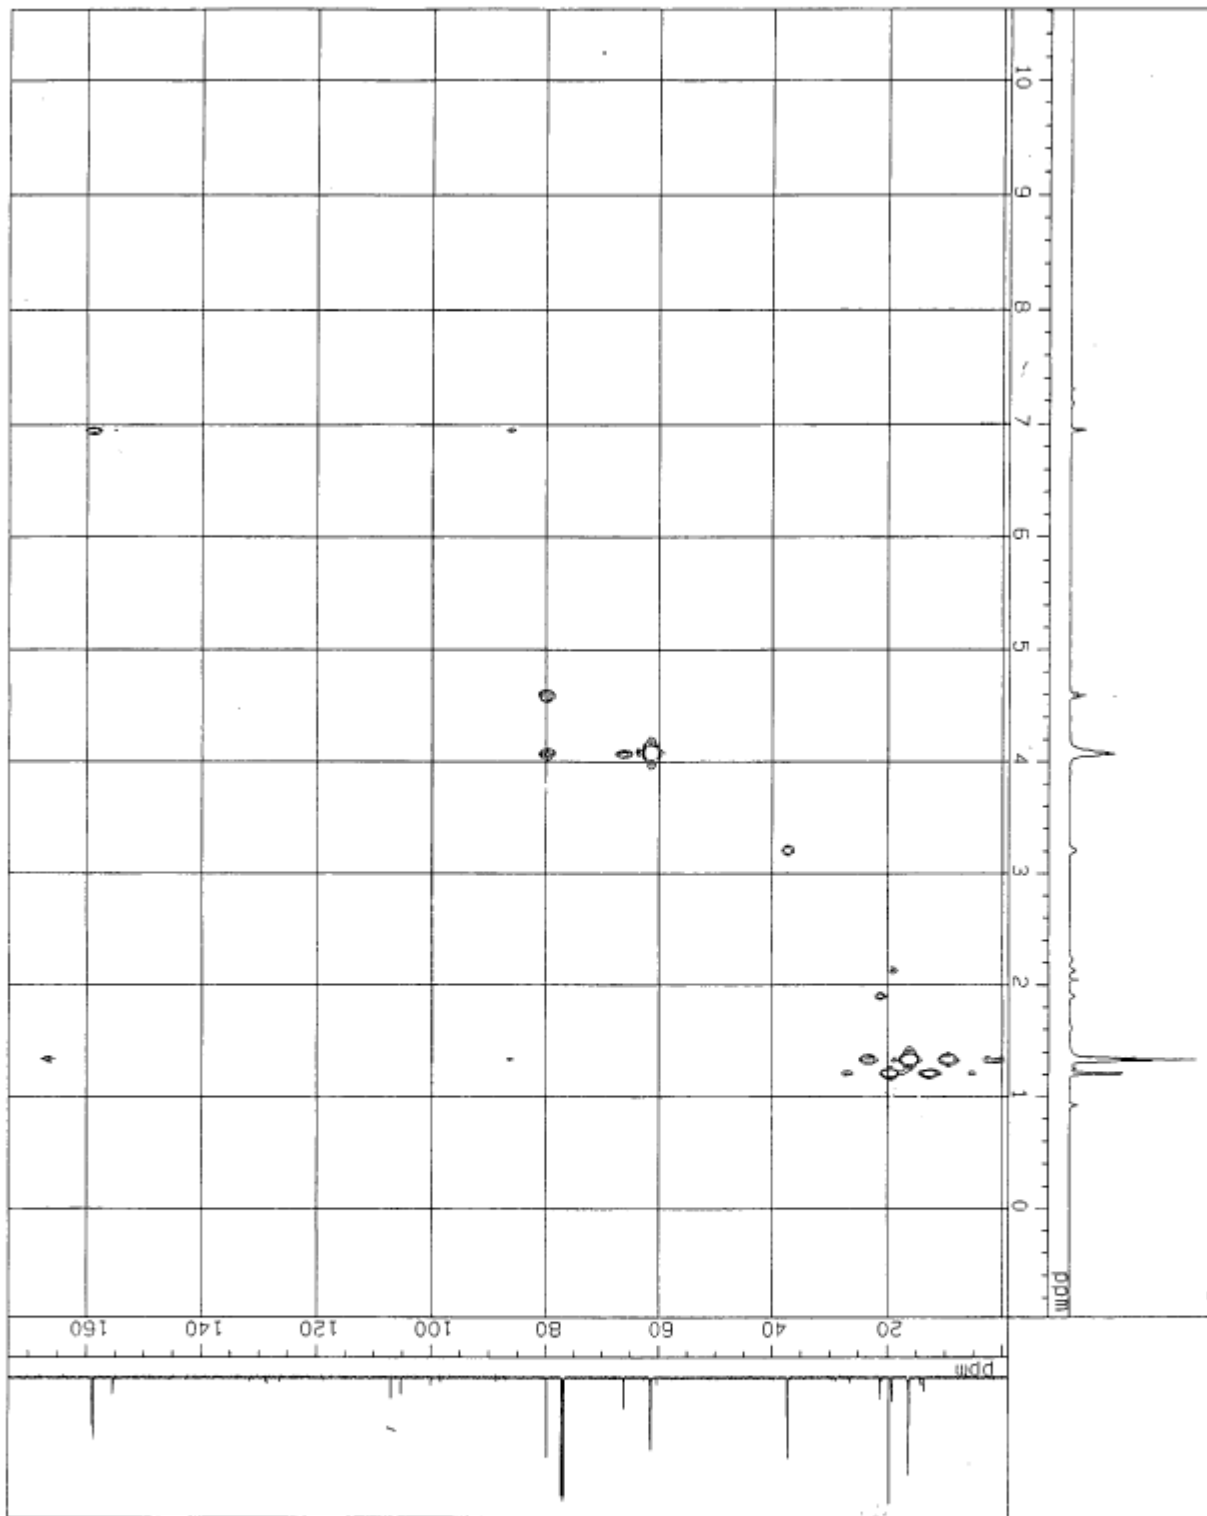

20-MAY-2002 18:04:33.17

DFILE : ALPHA  
 SF1LE : 1TA2552HSQC\_E555  
 HR2FILE: 1TA2550NOND\_E555  
 HR1FILE: 1TA2550BQM\_E555

COMNT : 1H HSQC IRLV2 1T

EXMOD : HSQC  
 IRMOD : IRLV2  
 POINT : 512  
 FREQU : 5793.74 HZ  
 SCANS : 128  
 DUMMY : 32  
 ACQTM : 0.0884 sec  
 PD : 1.1116 sec  
 RGAIN : 10

CLFRQ : 21958.72 HZ  
 CLPNT : 256  
 TOSCN : 128  
 CINT1 : 10.00 usec  
 CINT2 : 22.77 usec

PW1 : 39.50 usec  
 PW3 : 9.00 usec  
 PT1 : 120.0000 msec  
 P13 : 69.6800 msec  
 JCNST : 140.00 HZ

OBNUC : 1H  
 OBFRO : 500.00 MHZ  
 OBSSET : 162308.99 HZ

IRNUC : 13C  
 IRFRQ : 125.65 MHZ  
 IRSET : 126162.64 HZ  
 IRATN : 511  
 TRPPW : 1.5 usec  
 IRBP1 : 50  
 IRBP2 : 6  
 IRRNS : 4

ADBIT : 16  
 CTEMP : 23.2 C  
 CSPED : 0 HZ  
 SLVNT : CDCL3

RESOL : 11.32 HZ  
 CLRSD : 85.78 HZ  
 TLINR : 4  
 THTOP : 0.2462  
 THBTM : 0.0843

Operator:

13C DEPTD IRLV2 11A255 ENG SPLS 1st

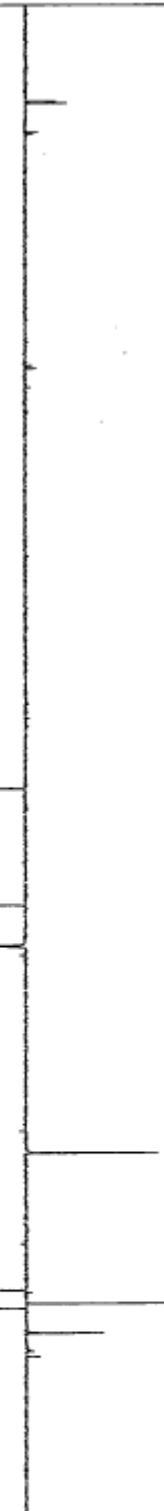

20-MAY-2002 16:02:41.81

Spectrum 1  
DFILE : ALPHA  
OBNUC : 13C

Spectrum 2  
DFILE : 11A2551045\_E5S5  
OBNUC : 13C

13C DEPTD IRLV2 11A255 ENG SPLS 9st

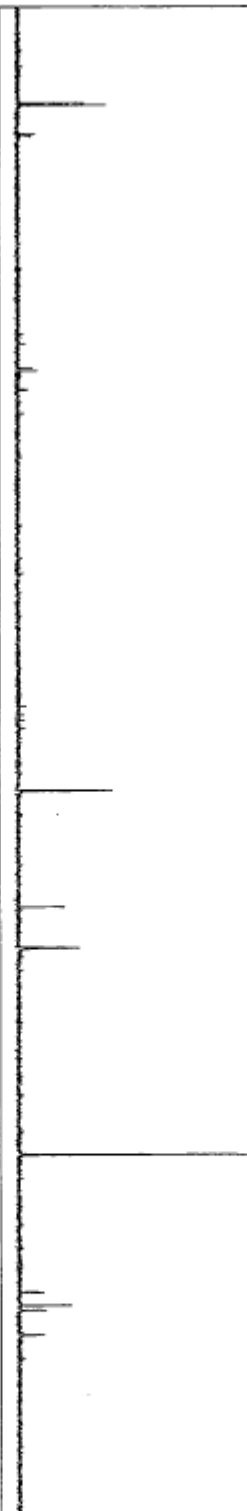

Spectrum 3  
DFILE : 11A2551090\_E5S5  
OBNUC : 13C

13C DEPTD IRLV2 11A255 ENG SPLS 4st

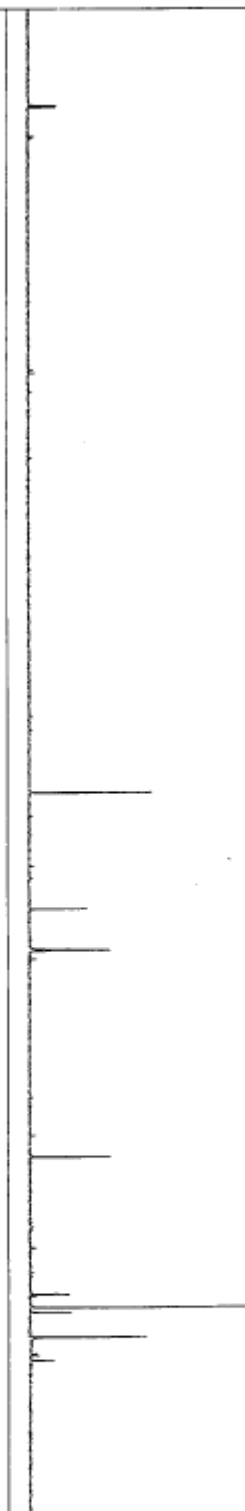

Spectrum 4  
DFILE : 11A25510135\_E5S5  
OBNUC : 13C

13C SINGL BCM 11A255 ENG SPLS

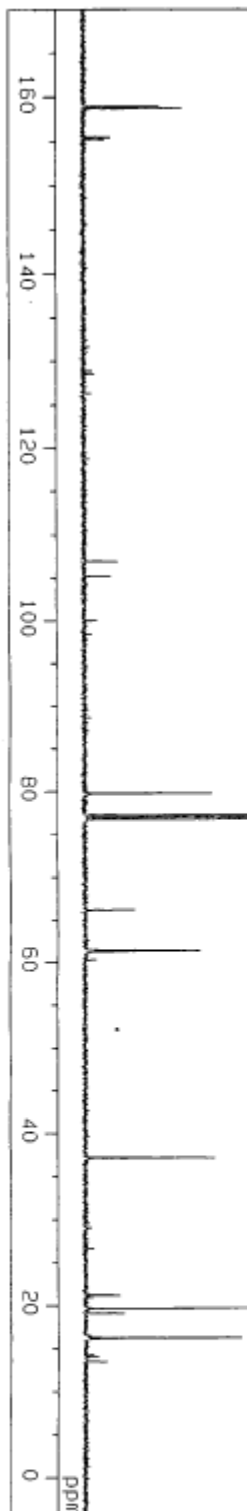

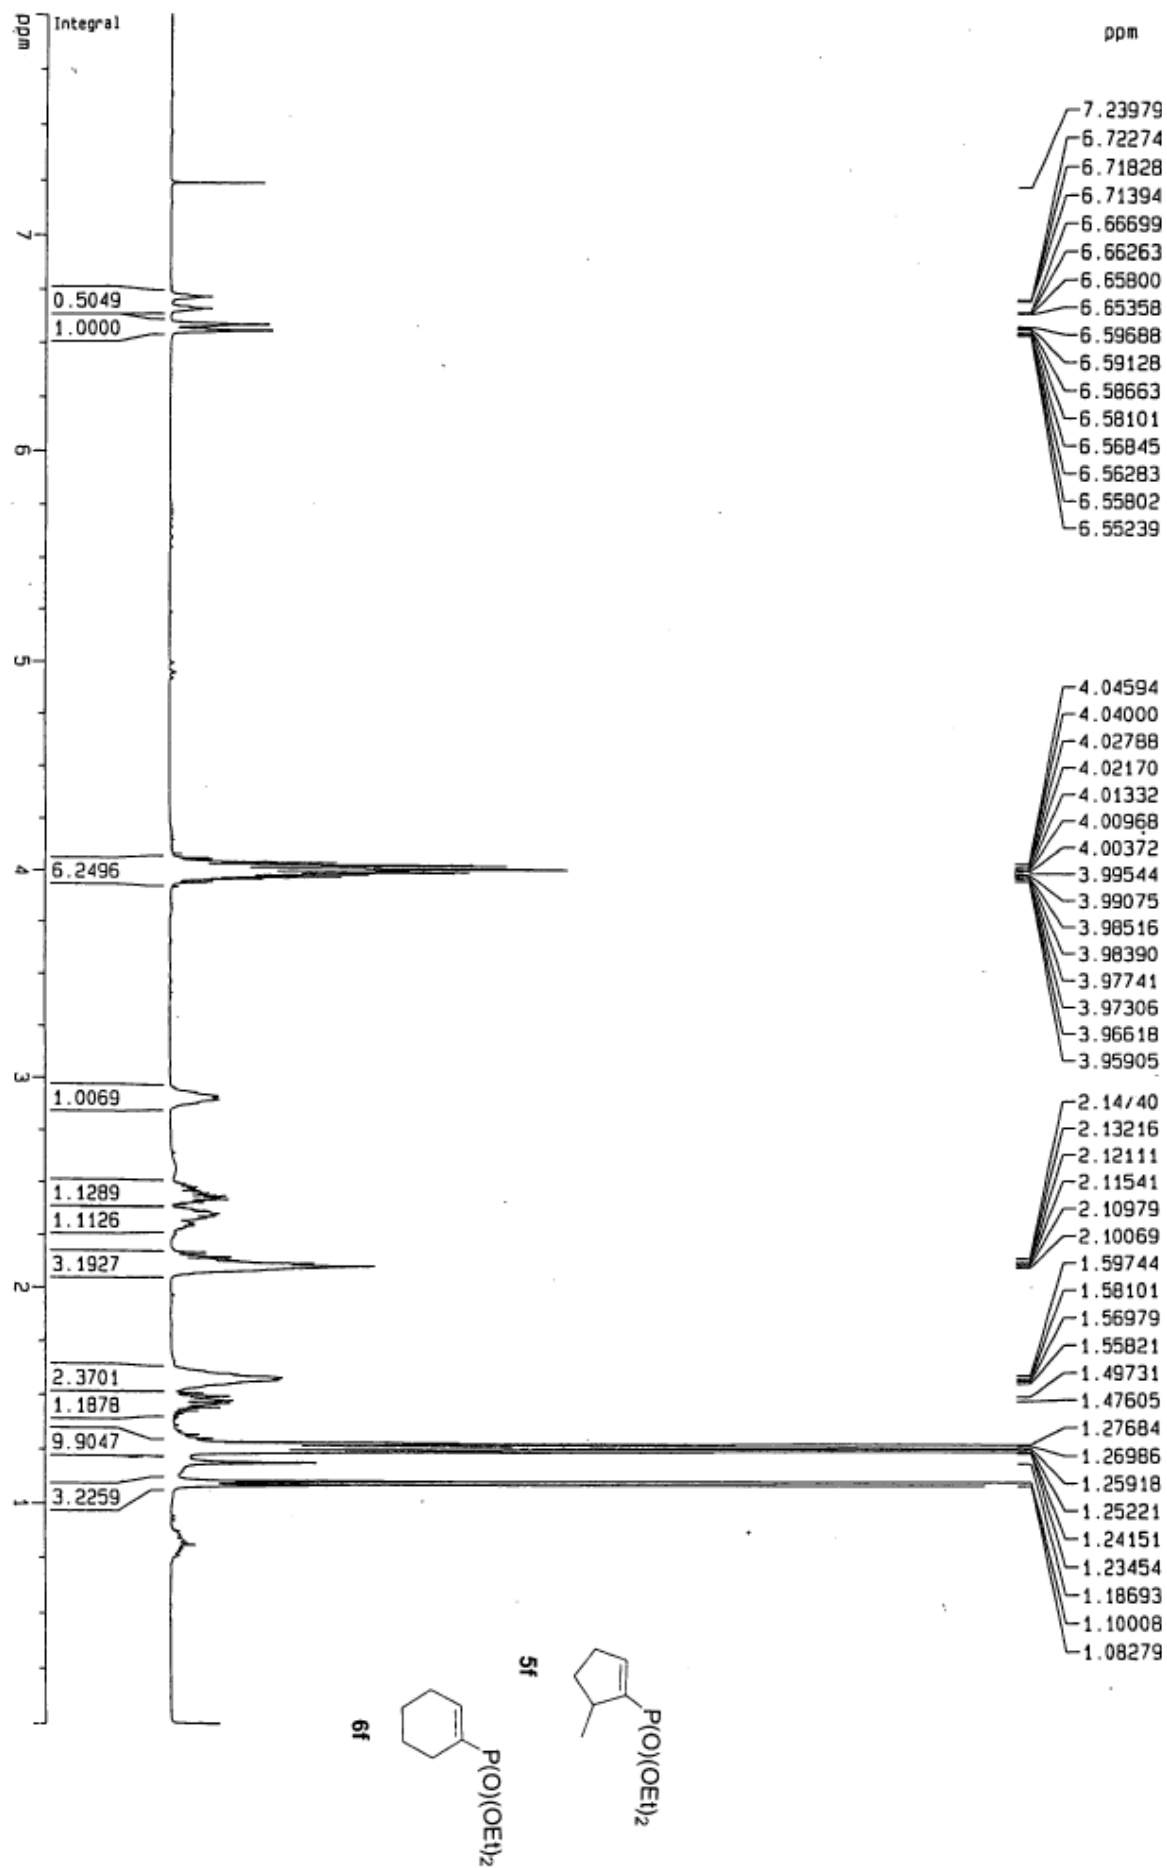

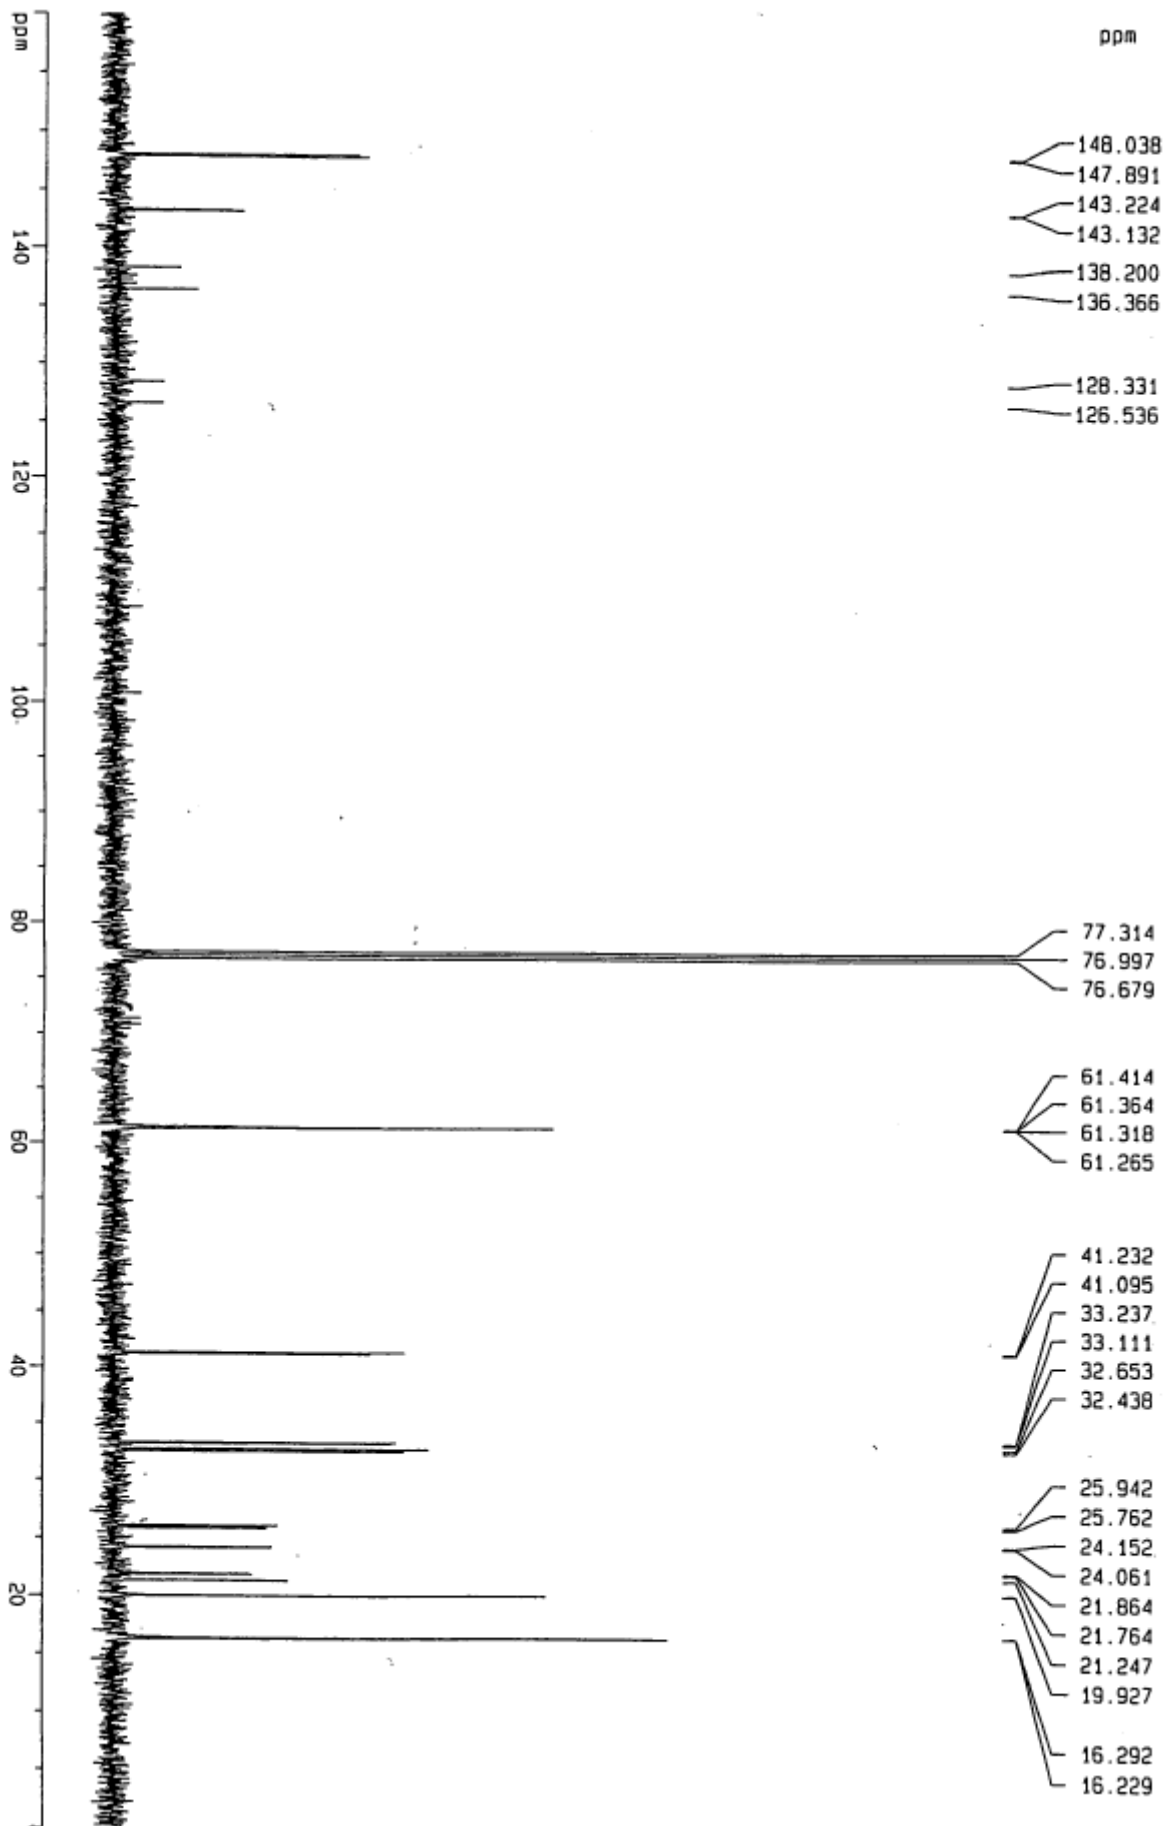

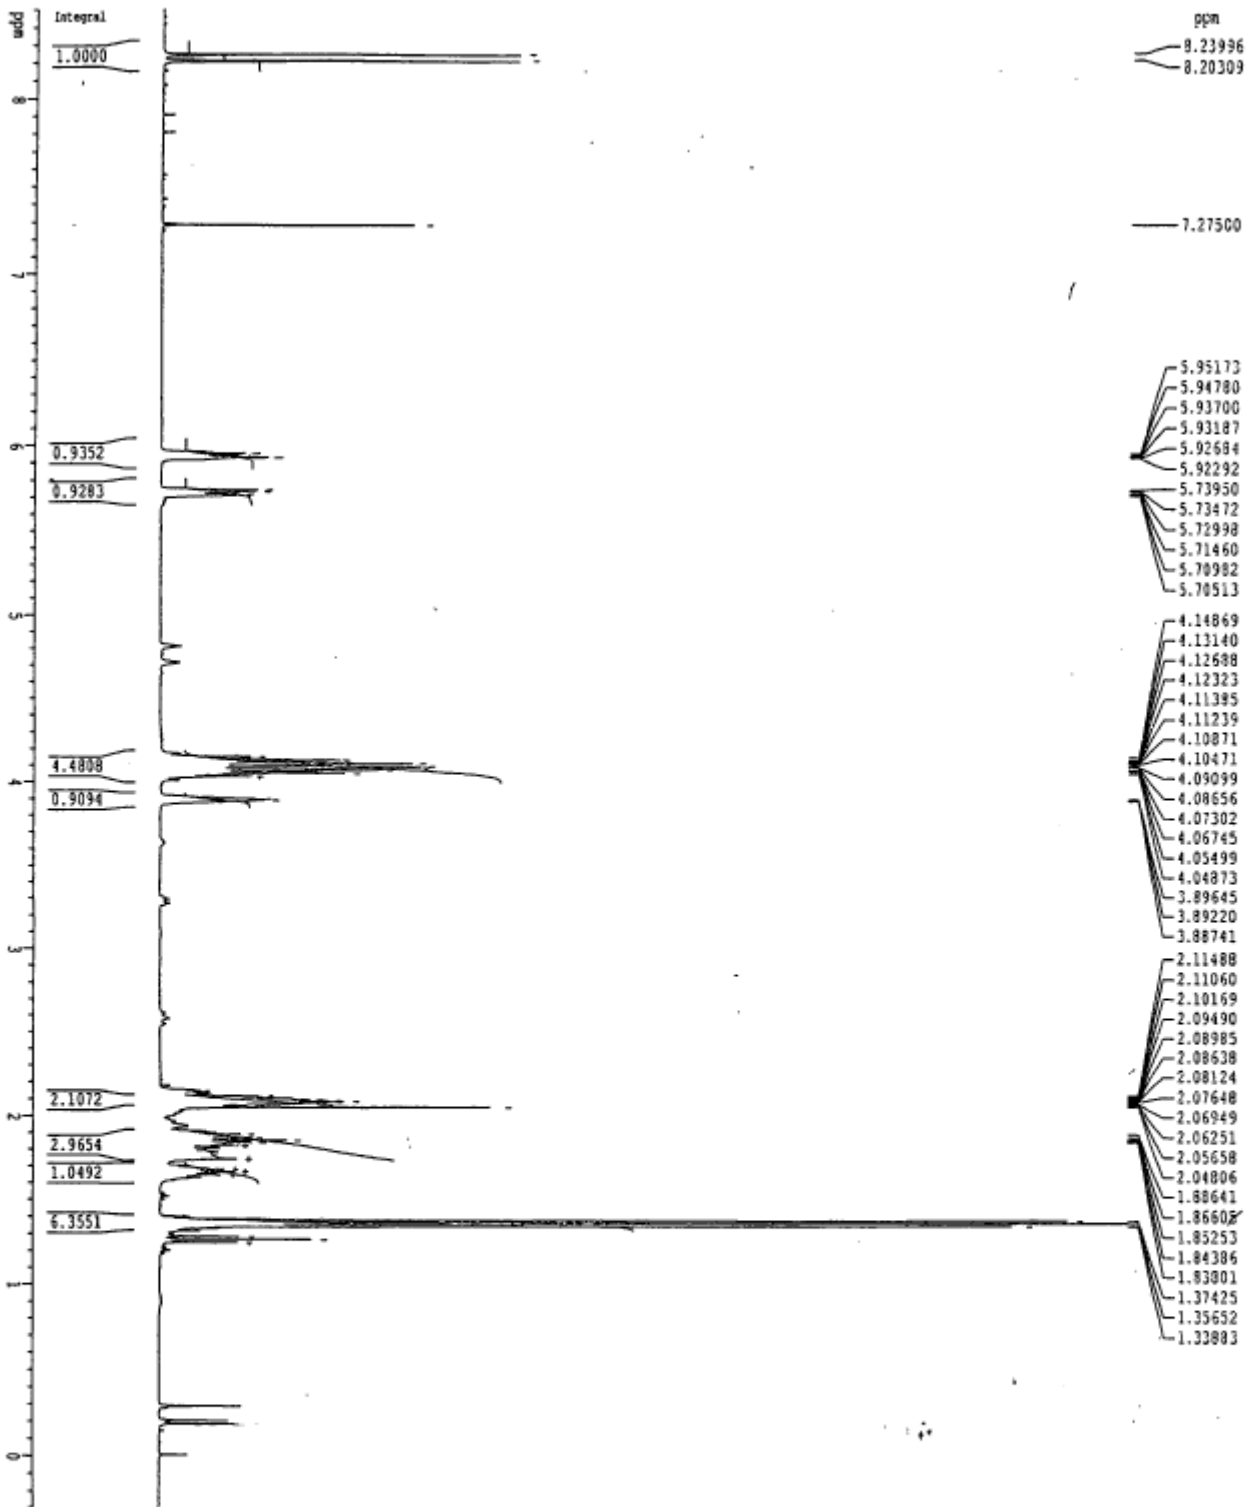

Current Data Parameters  
NAME: 03apno  
EXPNO: 450  
PROCNO: 1

F2 - Acquisition Parameters  
Date\_: 20070424  
Time: 14.29  
INSTRUM: specto  
PROBHD: 5 mm BBO BB-  
PULPROG: zg30  
TD: 65536  
SOLVENT: CDCl3  
NS: 16  
DS: 2  
SWH: 8259.825 Hz  
FIDRES: 0.132898 Hz  
AQ: 3.9715316 sec  
RG: 287.4  
CW: 68.000 usec  
DC: 6.00 usec  
TE: 308.0 K  
D1: 1.00000000 sec

NAME: CHANTEL F1  
INSTRUM: specto  
PROBHD: 5 mm BBO BB-  
PULPROG: zg30  
TD: 65536  
SOLVENT: CDCl3  
NS: 16  
DS: 2  
SWH: 8259.825 Hz  
FIDRES: 0.132898 Hz  
AQ: 3.9715316 sec  
RG: 287.4  
CW: 68.000 usec  
DC: 6.00 usec  
TE: 308.0 K  
D1: 1.00000000 sec

F2 - Processing parameters  
SI: 32768  
SF: 400.1300319 MHz  
WDM: EM  
SSB: 0  
LA: 0.30 Hz  
GB: 0  
PC: 1.00

1D NMR plot parameters  
CX: 10.00 cm  
CZ: 8.500 ppm  
F1: 3401.10 Hz  
F2: -0.300 ppm  
F3: -120.04 Hz  
FREQH: 0.29133 ppm/cm  
BENCH: 117.37143 Hz/cm

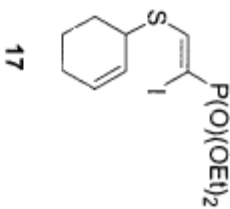

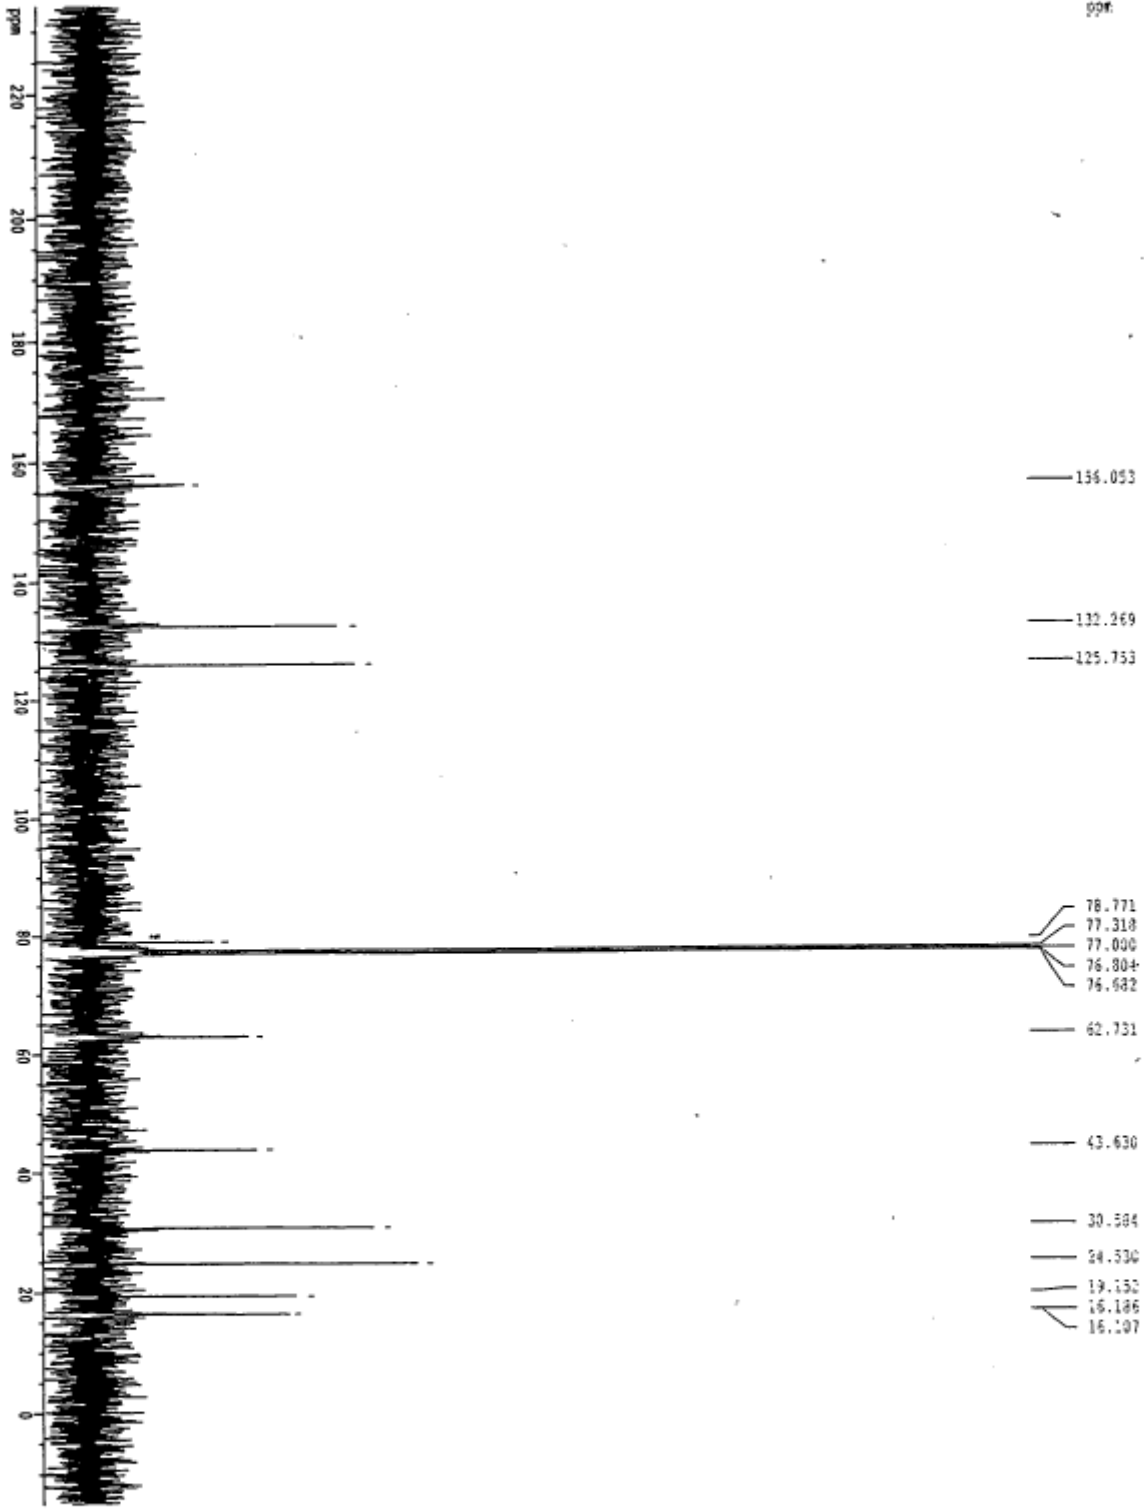

Current Data Parameters  
 NAME 03apeno  
 EXPRNO 4501  
 PROCNO 1

F2 - Acquisition Parameters

Date\_ 20030624  
 Time 14.23  
 INSTRUM dp400  
 PROBRD 5 mm BBO BB-  
 PULPROG zgpg30  
 TD 65536  
 SOLVENT CDCl3  
 NS 512  
 DS 2  
 SFR 25062.656 Hz  
 FIDRES 0.382426 Hz  
 AQ 1.3074932 sec  
 RG 6502  
 DM 19.950 usec  
 DE 5.00 usec  
 TE 300.0 K  
 D1 2.00000000 sec  
 d11 0.03000000 sec

CHANNEL F1

NUC1 13C  
 P1 7.90 usec  
 PL1 -2.00 dB  
 SFO1 100.6237959 MHz

CHANNEL F2

CHRG2 waitz16  
 NUC2 1H  
 PCPD2 80.00 usec  
 PL2 -6.00 dB  
 PL12 15.50 dB  
 SFO2 400.1316005 MHz

F2 - Processing parameters

SI 32768  
 SF 100.6127136 MHz  
 MW 0  
 SSB 0  
 LB 1.00 Hz  
 GB 0  
 PC 1.40

1D NMR plot parameters

CK 30.00 cm  
 F1P 234.102 ppm  
 F1 23553.60 Hz  
 F2P -14.999 ppm  
 F2 -1509.05 Hz  
 PPMCN 8.30334 ppm/cm  
 HZCN 835.42188 Hz/cm

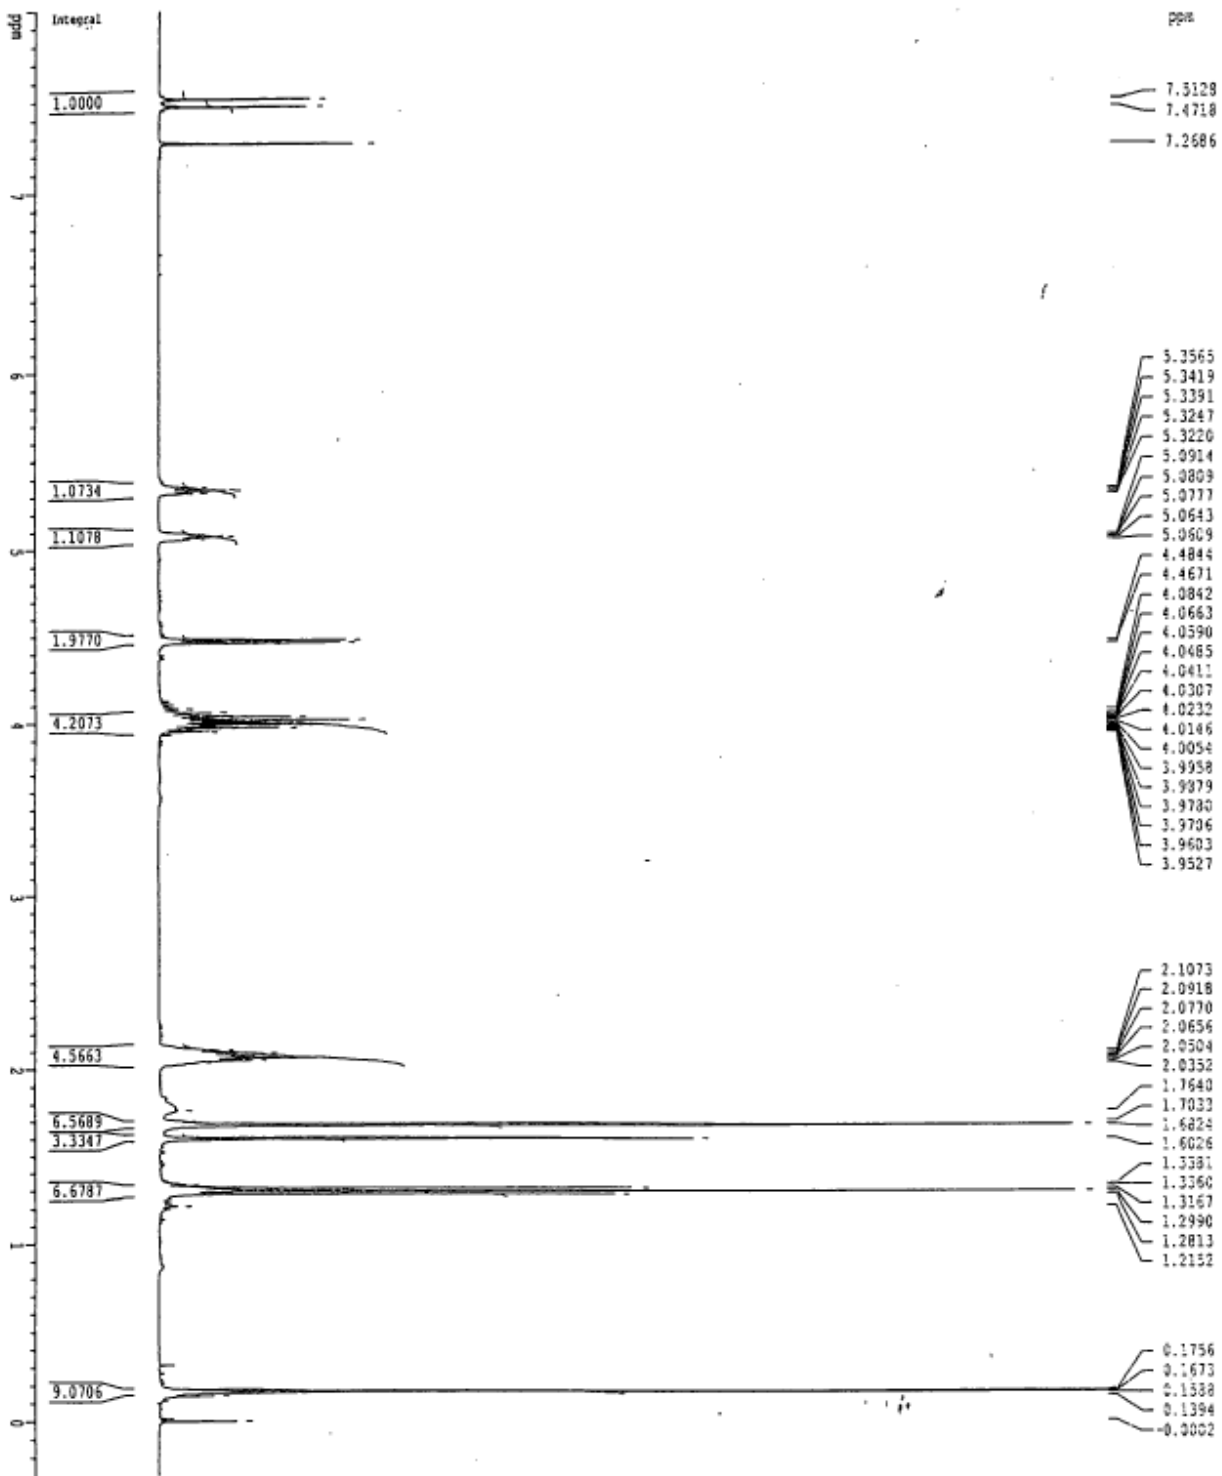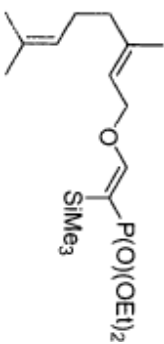

Current Data Parameters  
 Name: 01apoco  
 ExpNo: 3211  
 PROCNO: 1

F2 - Acquisition Parameters  
 Date\_: 20020914  
 Time: 1.35  
 INSTRUM: spect  
 PROBAD: 5 mm BBO BP-  
 PULPROG: zgpg  
 TD: 65536  
 SFO1: CMC11  
 NS: 16  
 DS: 2  
 SWH: 8256.825 Hz  
 FIDRES: 0.125898 Hz  
 AQ: 2.9715316 sec  
 RG: 287.4  
 DW: 50.500 usec  
 DE: 6.50 usec  
 TE: 300.0 K  
 D1: 1.00000000 sec

===== CHANNEL f1 =====  
 NUCL1: 1H  
 P1: 1.90 usec  
 PL1: -6.00 dB  
 SFO1: 400.119710 MHz

F2 - Processing parameters  
 SI: 32768  
 SF: 400.119054 MHz  
 WVM: 0 Hz  
 SSB: 0  
 LB: 0.20 Hz  
 GB: 0  
 PC: 1.00

1D NMR plot parameters  
 CX: 95.00 cm  
 CRP: 3.000 ppm  
 F1: 3201.000 Hz  
 F2: -13.000 Hz  
 FREQ1: 0.31667 MHz/cm  
 FREQ2: 110.70264 Hz/cm

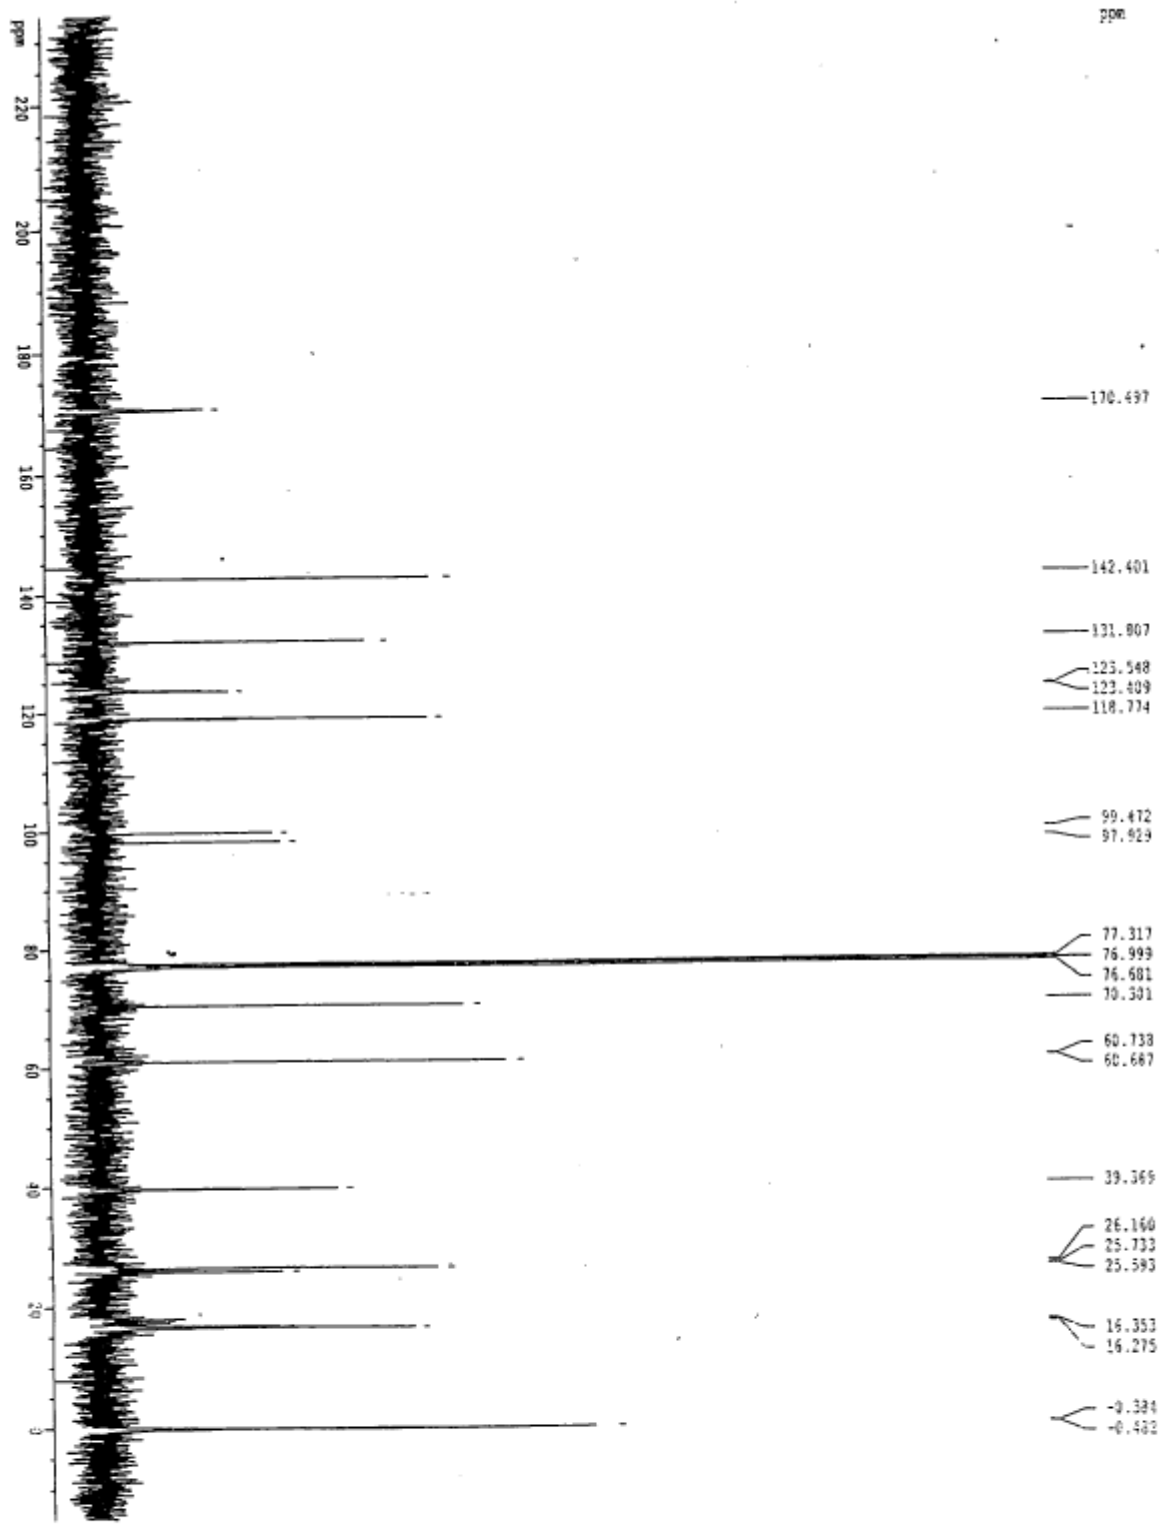

Current Data Parameters  
 NAME 03jemo  
 EXPRNO 3253  
 PROCNO 1

F2 - Acquisition Parameters  
 Date\_ 20020919  
 Time 1.01

INSTRUM dpw400  
 PROBR0 5 mm BBO Bb-  
 PULPROG zgpg30  
 TD 65536  
 ID C0C13  
 SOLVENT CDCl3  
 NS 256  
 DS 2  
 SSB 23062.658 Hz  
 FIDRES 0.382426 Hz  
 AQ 1.3074932 sec  
 RG 3231  
 DW 19.950 usec  
 DE 6.00 usec  
 TE 300.0 K  
 D1 2.00000000 sec  
 D11 0.03000000 sec

CHANNEL F1 -----  
 NUC1 13C  
 P1 7.90 usec  
 PL1 -2.00 dB  
 SFO1 100.6237959 MHz

CHANNEL F2 -----  
 CPDPRG2 waitz16  
 NUC2 1H  
 PCPD2 80.00 usec  
 PL2 -6.00 dB  
 PL12 15.50 dB  
 SFO2 400.1316005 MHz

F2 - Processing parameters  
 SI 32768  
 SF 100.6127136 MHz  
 MR0 EM  
 SSB 0  
 LB 1.00 Hz  
 GB 0  
 PC 1.40

1D NMR plot parameters  
 CX 30.00 cm  
 FIP 234.102 ppm  
 FI 23553.60 Hz  
 F2P -14.999 ppm  
 F2 8.30134 ppm/cm  
 PRMCK 835.42188 Hz/cm  
 BRCK



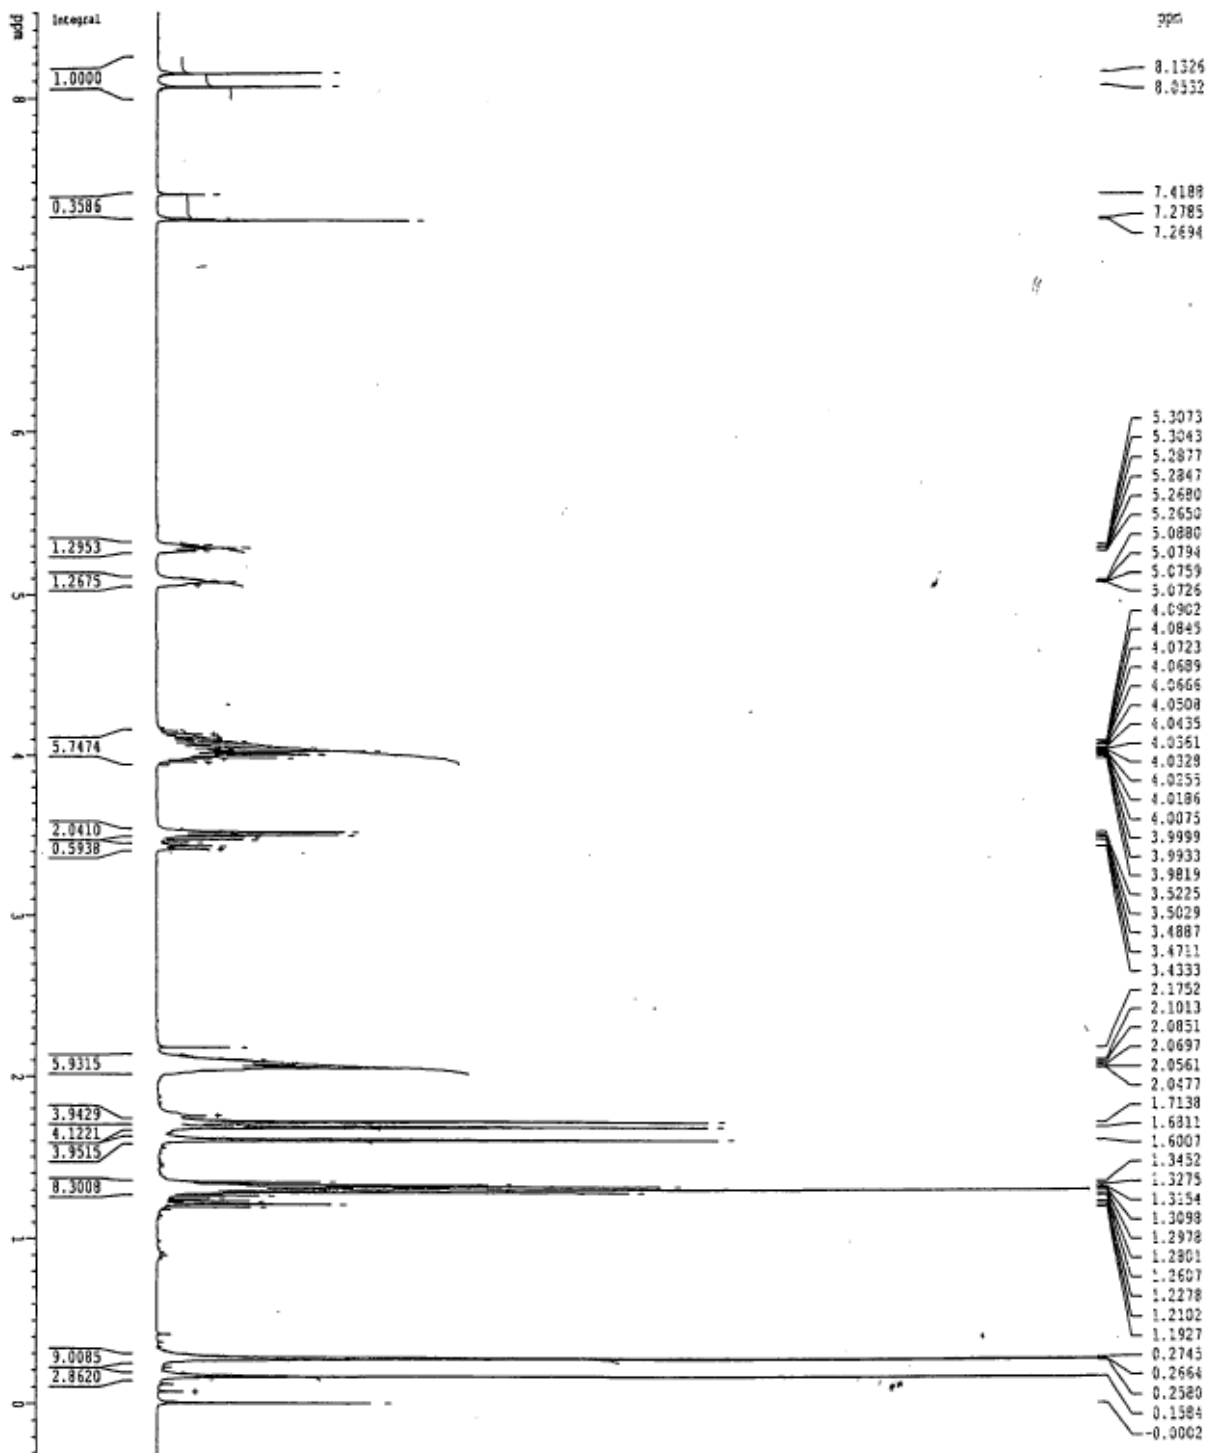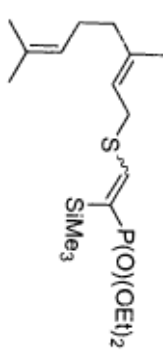

Current Data Parameters  
 Name: 01appp  
 Sample: 200  
 P1: 1  
 P2: 1

F2 - Acquisition Parameters  
 Date\_: 20071203  
 Time: 12.34  
 INSTRUM: dp450  
 PROBRD: 5 mm BBO BB-  
 PULPROG: zgpg30  
 TO: 65538  
 SOLVENT: CDCl3  
 NS: 16  
 DS: 2  
 SWH: 8256.825 Hz  
 FIDRES: 0.132888 Hz  
 AQ: 3.9715316 sec  
 RG: 287.4  
 DW: 60.650 usec  
 DE: 6.90 usec  
 TE: 300.0 K  
 D1: 1.00000000 sec

CHANNEL F1  
 NUC1: 1H  
 P1: 1.50 usec  
 PL1: -6.00 dB  
 SFO1: 400.1328718 MHz

F2 - Processing parameters  
 SI: 32768  
 SF: 400.1328718 MHz  
 WDW: EM  
 SS: 0.30 Hz  
 GB: 0  
 PC: 1.00

1D NMR plot parameters:  
 CX: 30.00 cm  
 CZ: 8.500 ppm  
 F1: 3401.10 Hz  
 F2: -0.300 ppm  
 F3: -128.64 Hz  
 P1: 0.29333 ppm/cm  
 P2: 117.31147 Hz/cm

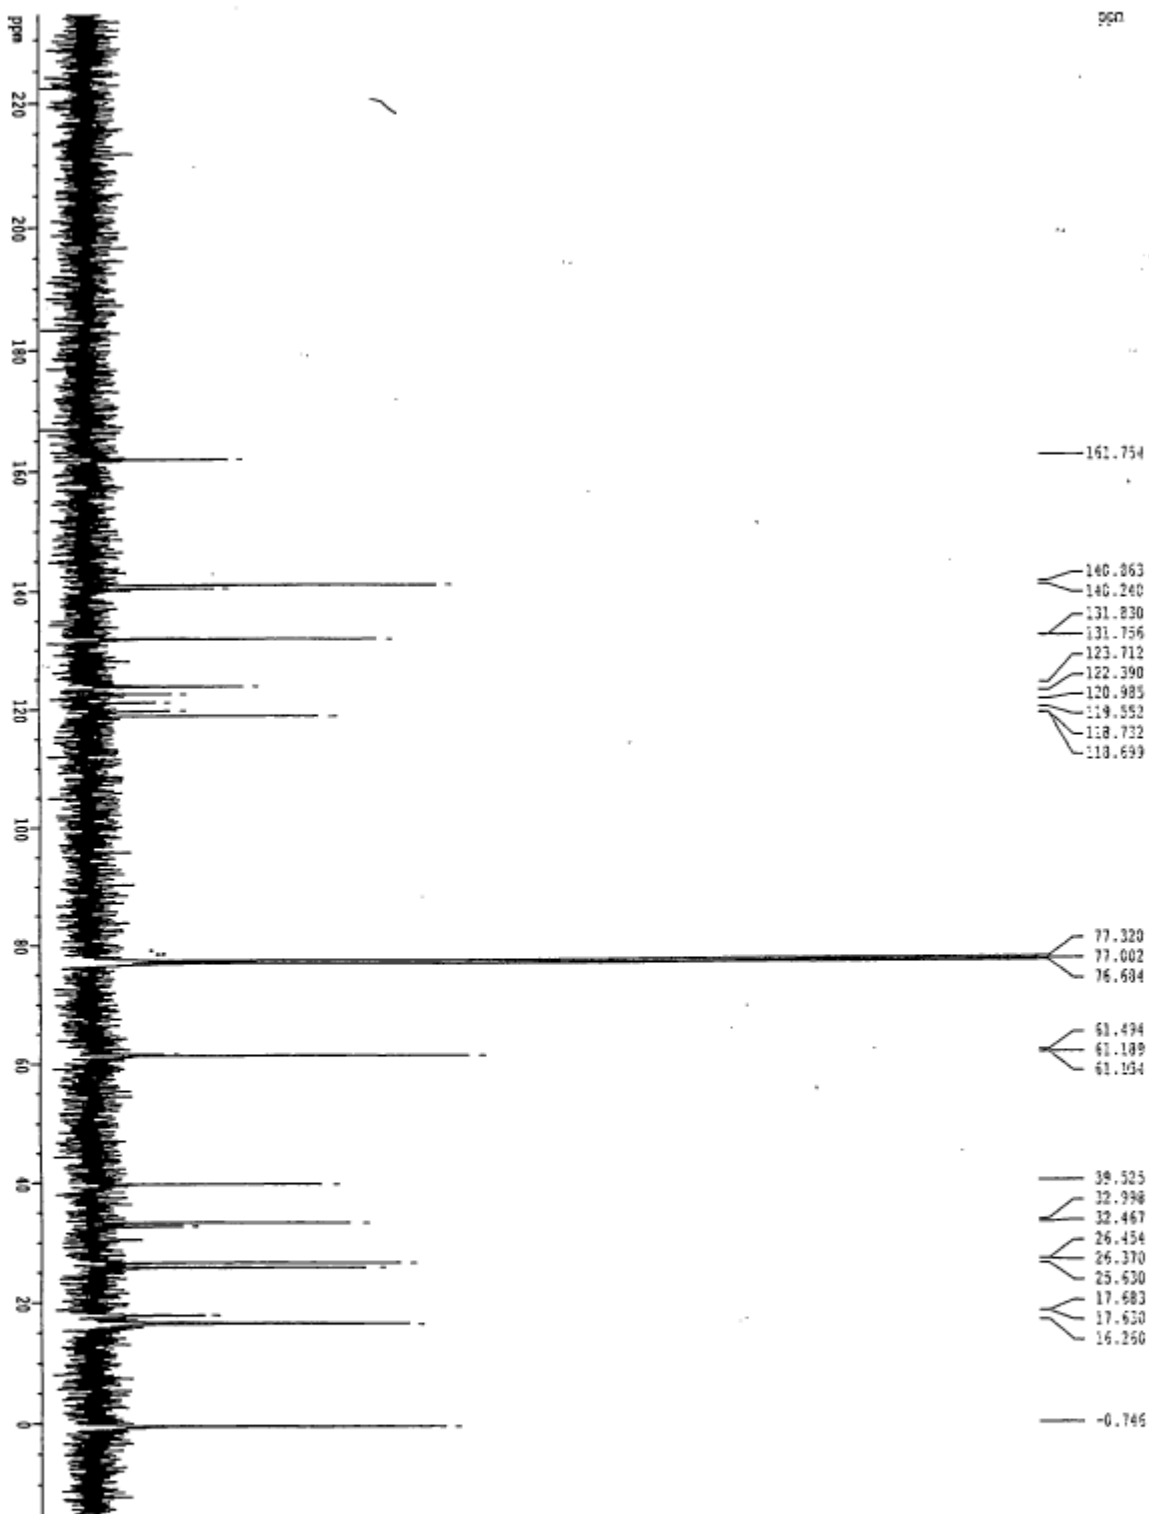

Current Data Parameters  
 NAME 03agemo  
 EXPNO 3761  
 PROCNO 1

F2 - Acquisition Parameters

Date\_ 20021128  
 Time 15.05  
 INSTRUM dpx400  
 PROBRD 5 mm BBO BB-  
 PULPROG zgpg30  
 TD 65536  
 SOLVENT CDCl3  
 NS 512  
 DS 2  
 SFR 25062.656 Hz  
 FTRES 0.382426 Hz  
 AQ 1.3074932 sec  
 RG 6502  
 DW 19.950 usec  
 DE 6.00 usec  
 TE 300.0 K  
 D1 2.00000000 sec  
 d11 0.03000000 sec

CHANNEL F1

NUC1 13C  
 P1 7.90 usec  
 PL1 -2.00 dB  
 SFO1 100.6237959 MHz

CHANNEL F2

CPBRG2 waltz16  
 NUC2 1H  
 PCP02 80.00 usec  
 PL2 -6.00 dB  
 PUL2 15.50 dB  
 SFO2 400.1316905 MHz

F2 - Processing parameters

SI 32768  
 SF 100.6127736 MHz  
 WDM EM  
 SSB 0  
 LB 1.00 Hz  
 GB 0  
 PC 1.40

ID NMR plot parameters

CX 30.00 cm  
 FLP 234.102 ppm  
 F1 23553.61 Hz  
 F2P -14.999 ppm  
 F2 -1509.05 Hz  
 FPMCM 8.30334 ppm/cm  
 RMCM 835.42180 Hz/cm

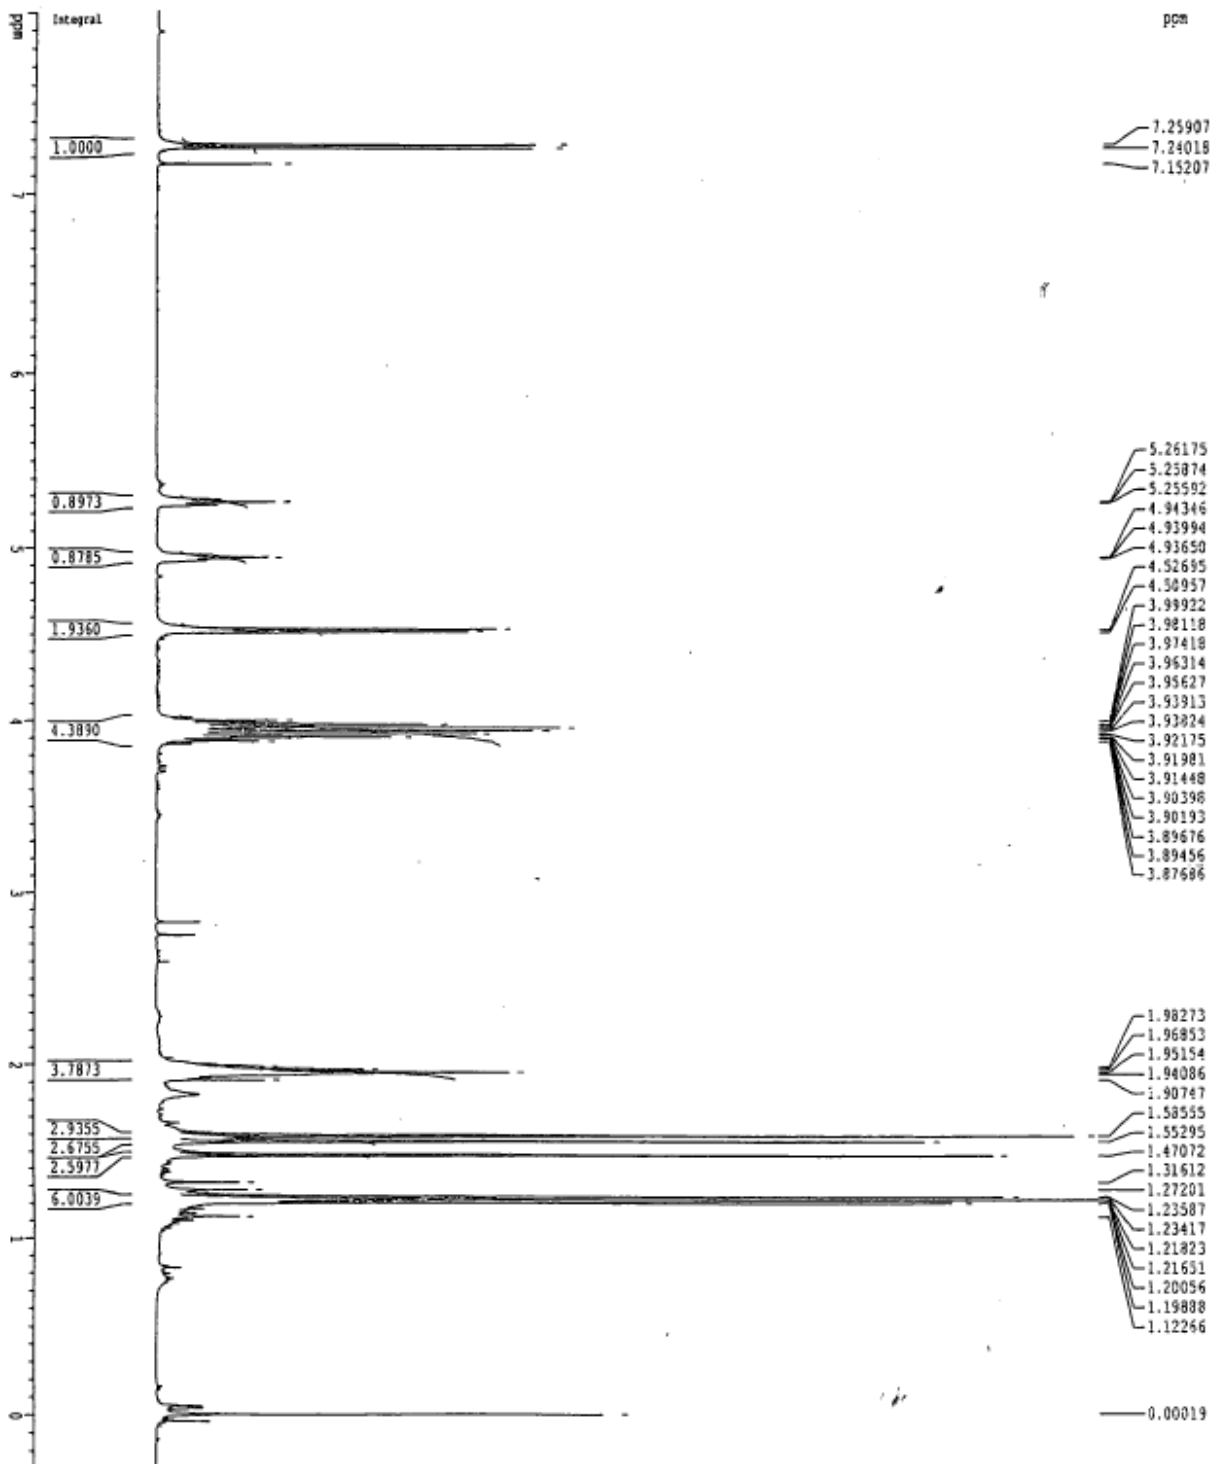

Current Data Parameters  
 NAME: 619pno  
 EXPNO: 351  
 PROCNO: 1

F2 - Acquisition Parameters  
 Date\_: 20020916  
 Time: 12.25  
 INSTRUM: spect  
 PROBRD: 5 mm BBO BB-  
 PULPROG: zgpg30  
 TO: 1920  
 SOLVENT: CDCl3  
 NS: 15  
 DS: 2  
 SWH: 8250.825 Hz  
 FIDRES: 0.123898 Hz  
 AQ: 3.9115716 sec  
 RG: 114  
 MW: 60.400 usec  
 DE: 5.00 usec  
 TE: 300.2 K  
 D1: 1.00000000 sec

===== CHANNEL f1 =====  
 NUCE1: 13C  
 P1: 1.50 usec  
 PL1: -5.00 dB  
 SFO1: 400.1261018 MHz

F2 - Processing parameters  
 SI: 32768  
 SF: 400.1300271 MHz  
 WDW: EM  
 SSB: 0  
 LB: 0.30 Hz  
 GB: 0  
 PC: 1.00

10 NMR plot parameters  
 CX: 30.00 cm  
 FIP: 8.000 ppm  
 F1: 3201.04 Hz  
 F2: -0.300 ppm  
 F3: -120.04 Hz  
 PRINCM: 0.21867 ppm/cm  
 BRCH: 110.70265 Hz/cm

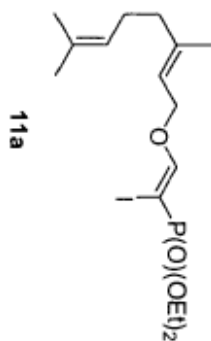

ppm

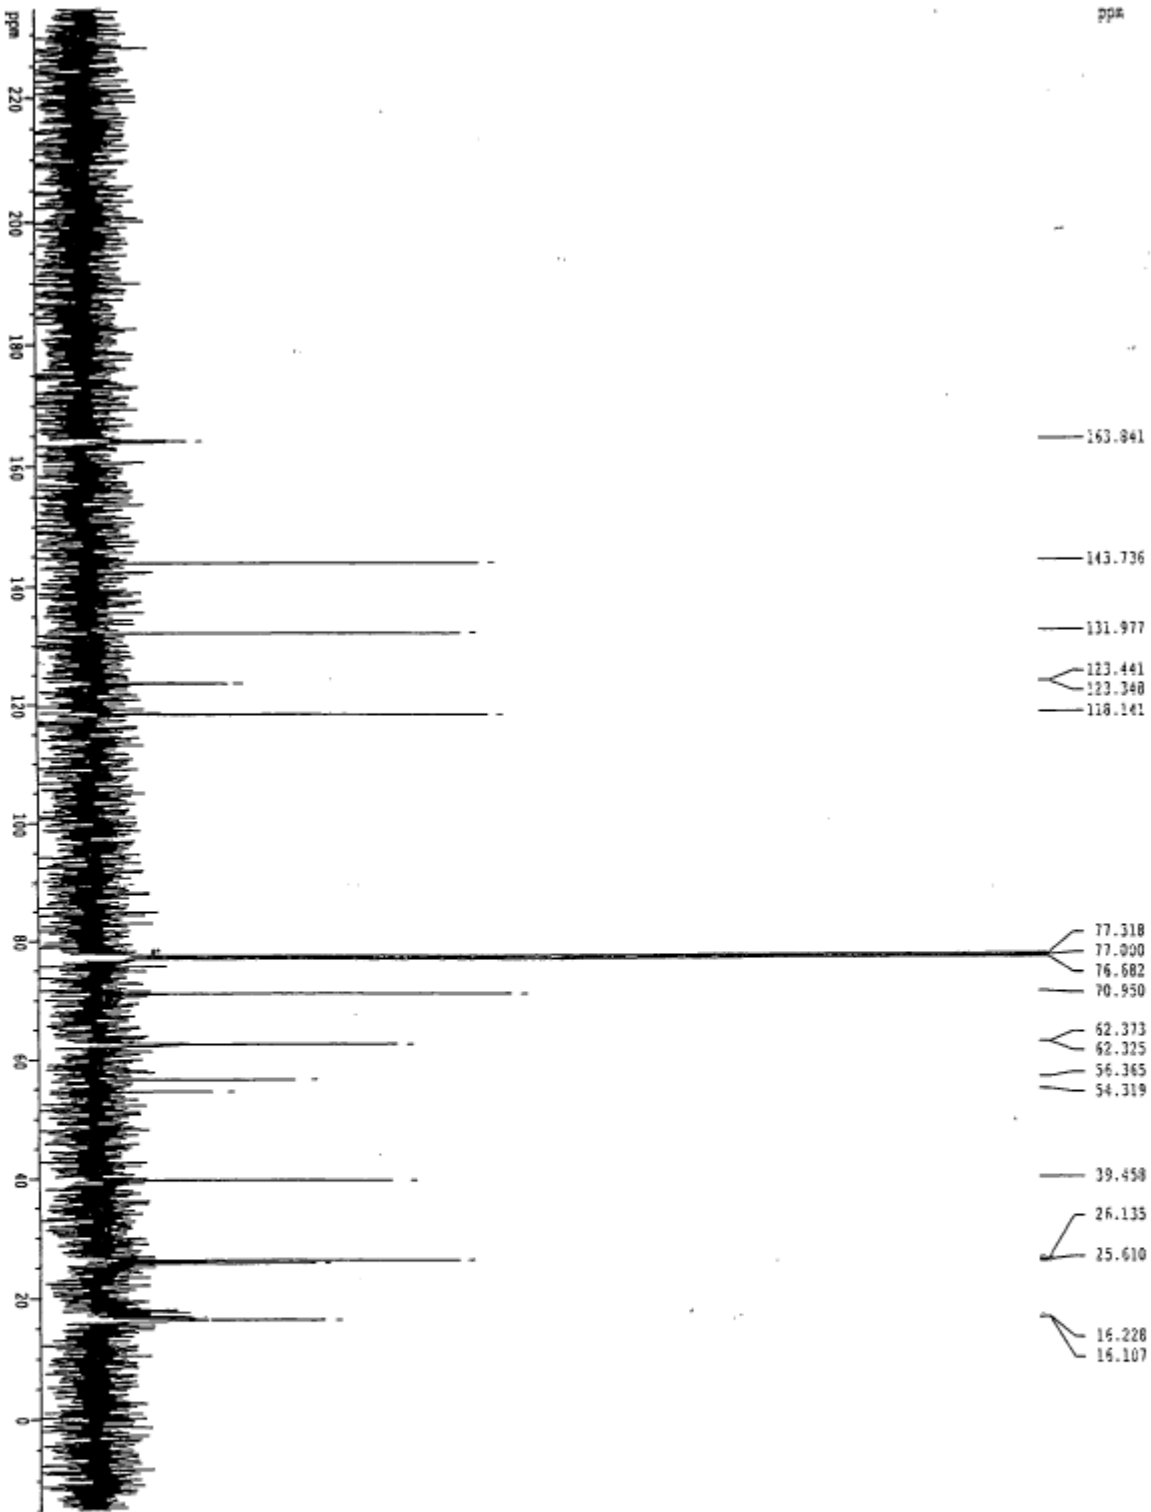

Current Data Parameters

NAME D3agemo  
 EXPNO 3362  
 PROCNO 1

F2 - Acquisition Parameters

Date\_ 20020926  
 Time 12.42  
 INSTRUM dpx400  
 PROBHD 5 mm BBO BB-  
 PULPROG zgpg30  
 TD 65536  
 SOLVENT CDCl3  
 NS 256  
 DS 2  
 SFO2 25062.656 Hz  
 FIDRES 0.382426 Hz  
 AQ 1.3074932 sec  
 RG 3231  
 INW 19.950 usec  
 TE 6.00 usec  
 TS 300.0 K  
 D1 2.0000000 sec  
 d11 0.03000000 sec

CHANNEL F1

NUC1 13C  
 P1 7.90 usec  
 PL1 -2.00 dB  
 SFO1 100.6237959 MHz

CHANNEL F2

CPDPRG2 waltz16  
 NUC2 1H  
 PCPRG2 80.00 usec  
 PL2 -6.00 dB  
 PL12 15.50 dB  
 SFO2 400.1316005 MHz

F2 - Processing parameters

SI 32768  
 SF 100.6127752 MHz  
 WDW EM  
 SSB 0  
 LB 1.00 Hz  
 GB 0  
 PC 1.40

1D NMR plot parameters

CX 30.00 cm  
 F1P 234.086 ppm  
 F1 23552.08 Hz  
 F2P -15.014 ppm  
 F2 -1510.58 Hz  
 PENCH 8.30334 ppm/cm  
 HSCX 835.42194 Hz/cm

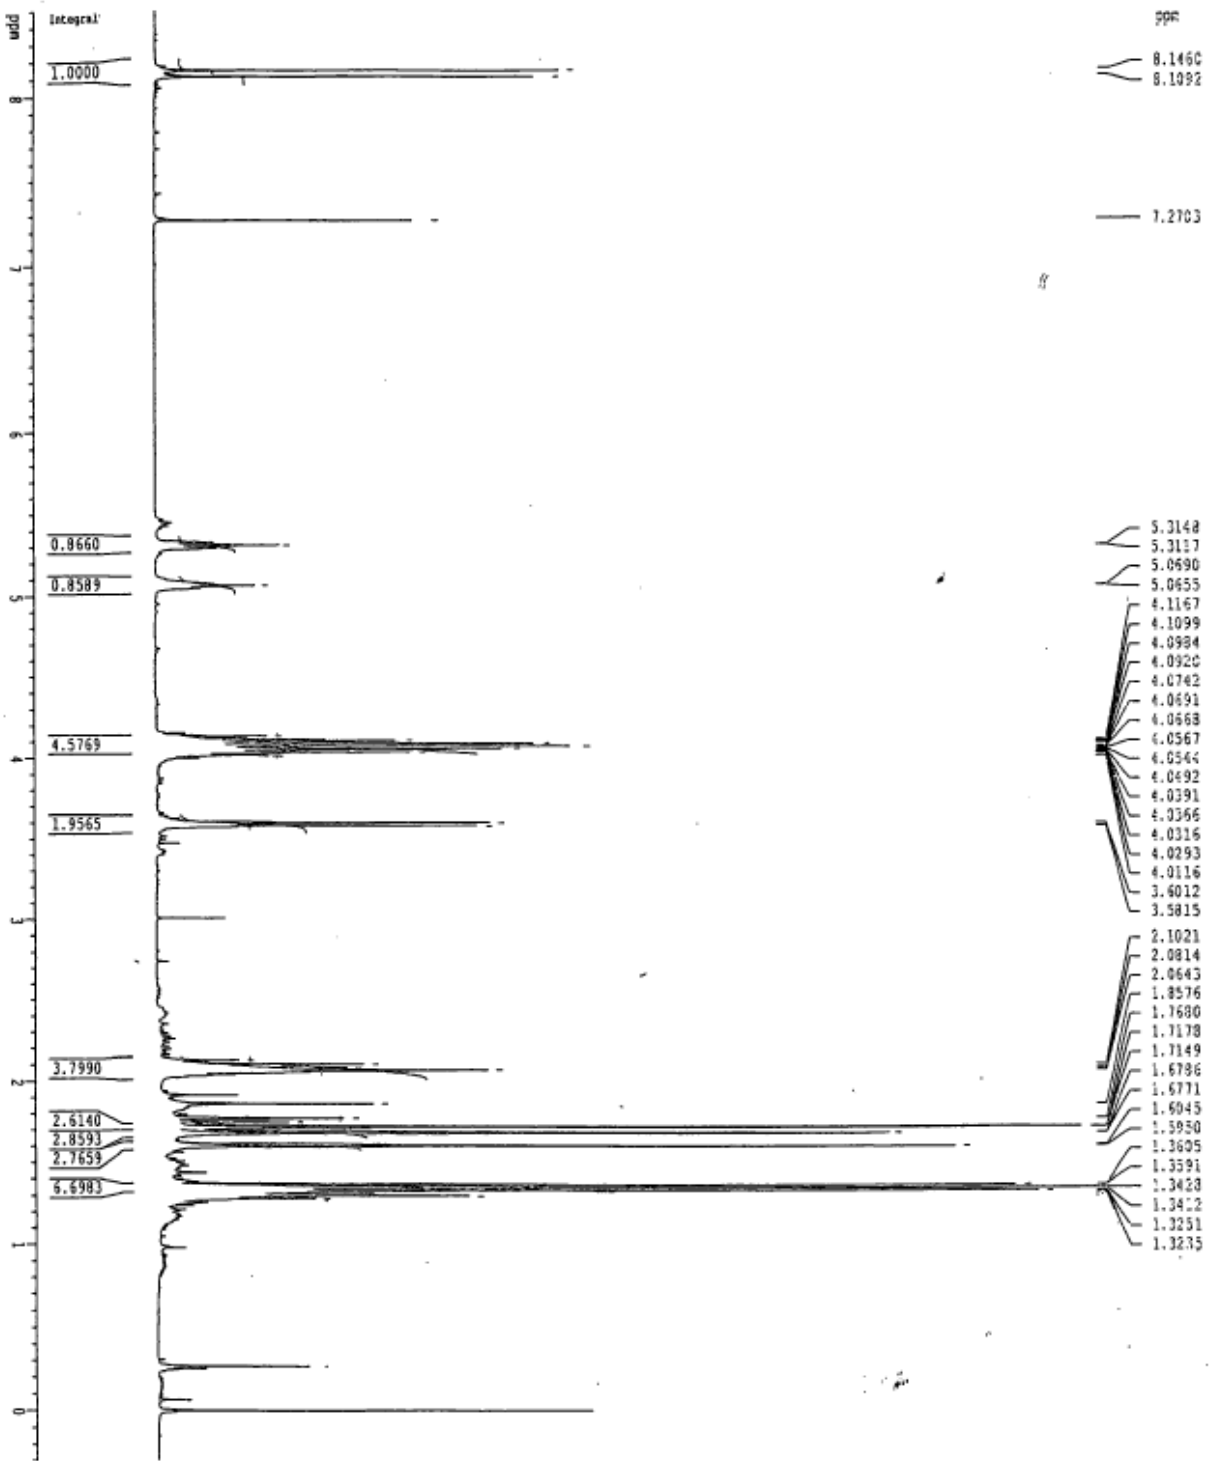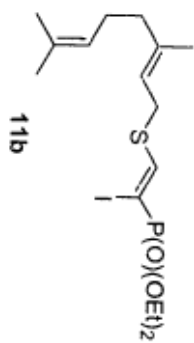

Current Data Parameters  
 NAME 03apago  
 EXPNO 1  
 PROCNO 1

F2 - Acquisition Parameters  
 Date\_ 20040315  
 Time 11:12  
 INSTRUM spect  
 PULPROG 5 mm BBO SB-  
 FREQNUC 400  
 F2FREQ 453.52  
 D0 DUNDT  
 CXC17  
 SFO 16  
 SFO 2  
 SFO 0250.825 Hz  
 FIDRES 0.125898 Hz  
 AQ 3.9715316 sec  
 RG 30.5  
 DW 50.600 usec  
 DE 5.00 usec  
 TE 300.0 K  
 D1 1.00000000 sec

===== CHANNEL f1 =====  
 NUC1 1H  
 P1 15.00 usec  
 PL1 -5.00 dB  
 SFO1 400.1324710 MHz

F2 - Processing parameters  
 SI 32768  
 SF 400.1300052 MHz  
 HGW 0 Hz  
 SSB 0  
 LB 0.30 Hz  
 GB 0  
 RC 1.00

LD INEPT parameters  
 CZ 36.00 cm  
 E2P 340.1500 ppm  
 F1 340.1500 Hz  
 F2 -126.04 ppm  
 F2P -126.04 Hz  
 FWHM 0.28333 ppm/cm  
 HZCN 137.37147 Hz/cm

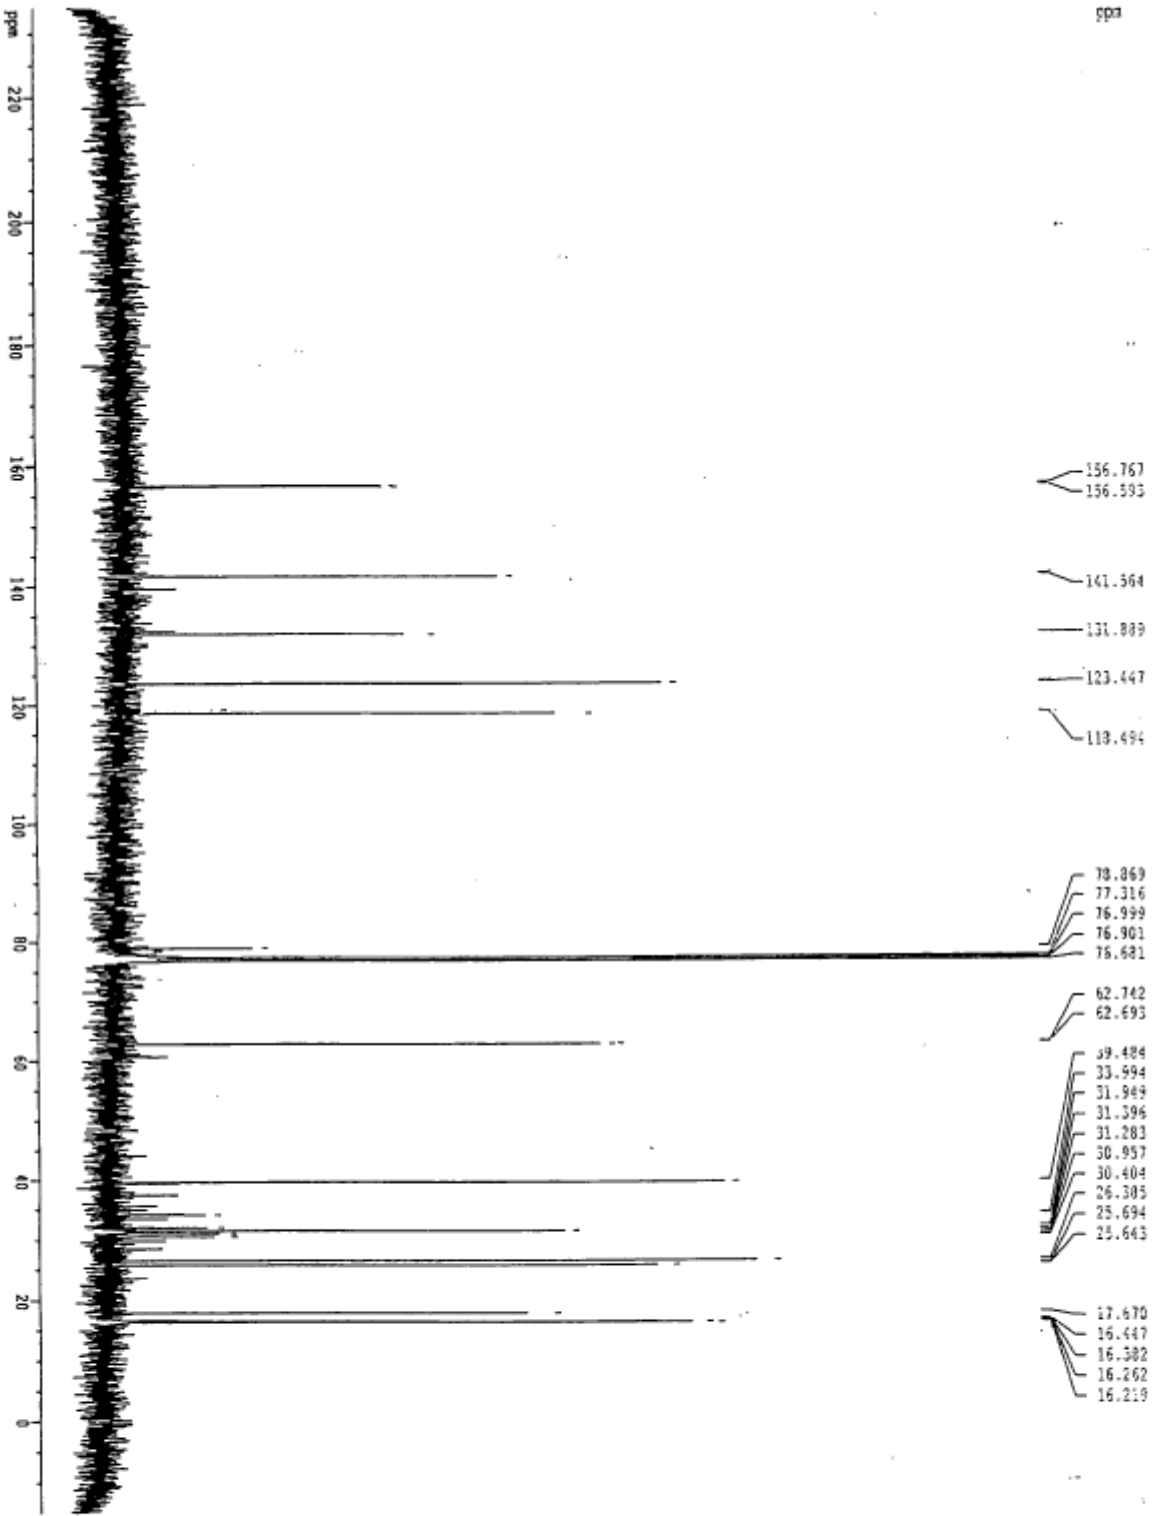

ppm

- 156.767
- 156.593
- 141.564
- 131.889
- 123.447
- 113.694
- 78.869
- 77.316
- 76.999
- 76.901
- 75.681
- 62.742
- 62.693
- 39.484
- 33.994
- 31.949
- 31.396
- 31.283
- 30.957
- 30.404
- 26.305
- 25.694
- 25.643
- 17.670
- 16.447
- 16.382
- 16.262
- 16.219

Current Data Parameters

NAME 03sgemo  
 EXPNO 3  
 PROCNO 1

F2 - Acquisition Parameters

Date\_ 20040216  
 Time 18.36  
 INSTRUM dpx400  
 PULPROG 5 mm BBO BB-  
 PULPROG zgpg30  
 TD 65536  
 SOLVENT CMC13  
 NS 1024  
 DS 2  
 SWH 25062.656 Hz  
 FIDRES 0.382426 Hz  
 AQ 1.3074932 sec  
 RG 6502  
 DW 19.950 usec  
 DE 6.00 usec  
 TE 300.0 K  
 D1 2.00000000 sec  
 d11 0.03000000 sec

CHANNEL F1

NUC1 13C  
 P1 7.90 usec  
 PL1 -2.00 dB  
 SFO1 100.6237959 MHz

CHANNEL F2

CPDPRG2 waltz16  
 NUC2 1H  
 PCPD2 80.00 usec  
 PL2 -6.00 dB  
 PL12 10.00 dB  
 SFO2 400.1316005 MHz

F2 - Processing parameters

SI 32768  
 SF 100.6127736 MHz  
 NQW EM  
 SSB 0  
 LB 1.00 Hz  
 GB 0  
 PC 1.40

1D NMR plot parameters

CX 30.00 cm  
 FILP 234.102 ppm  
 F1 23553.61 Hz  
 F2P -14.999 ppm  
 F2 -1503.05 Hz  
 FPPMCM 8.30334 ppm/cm  
 HZCM 835.42188 Hz/cm

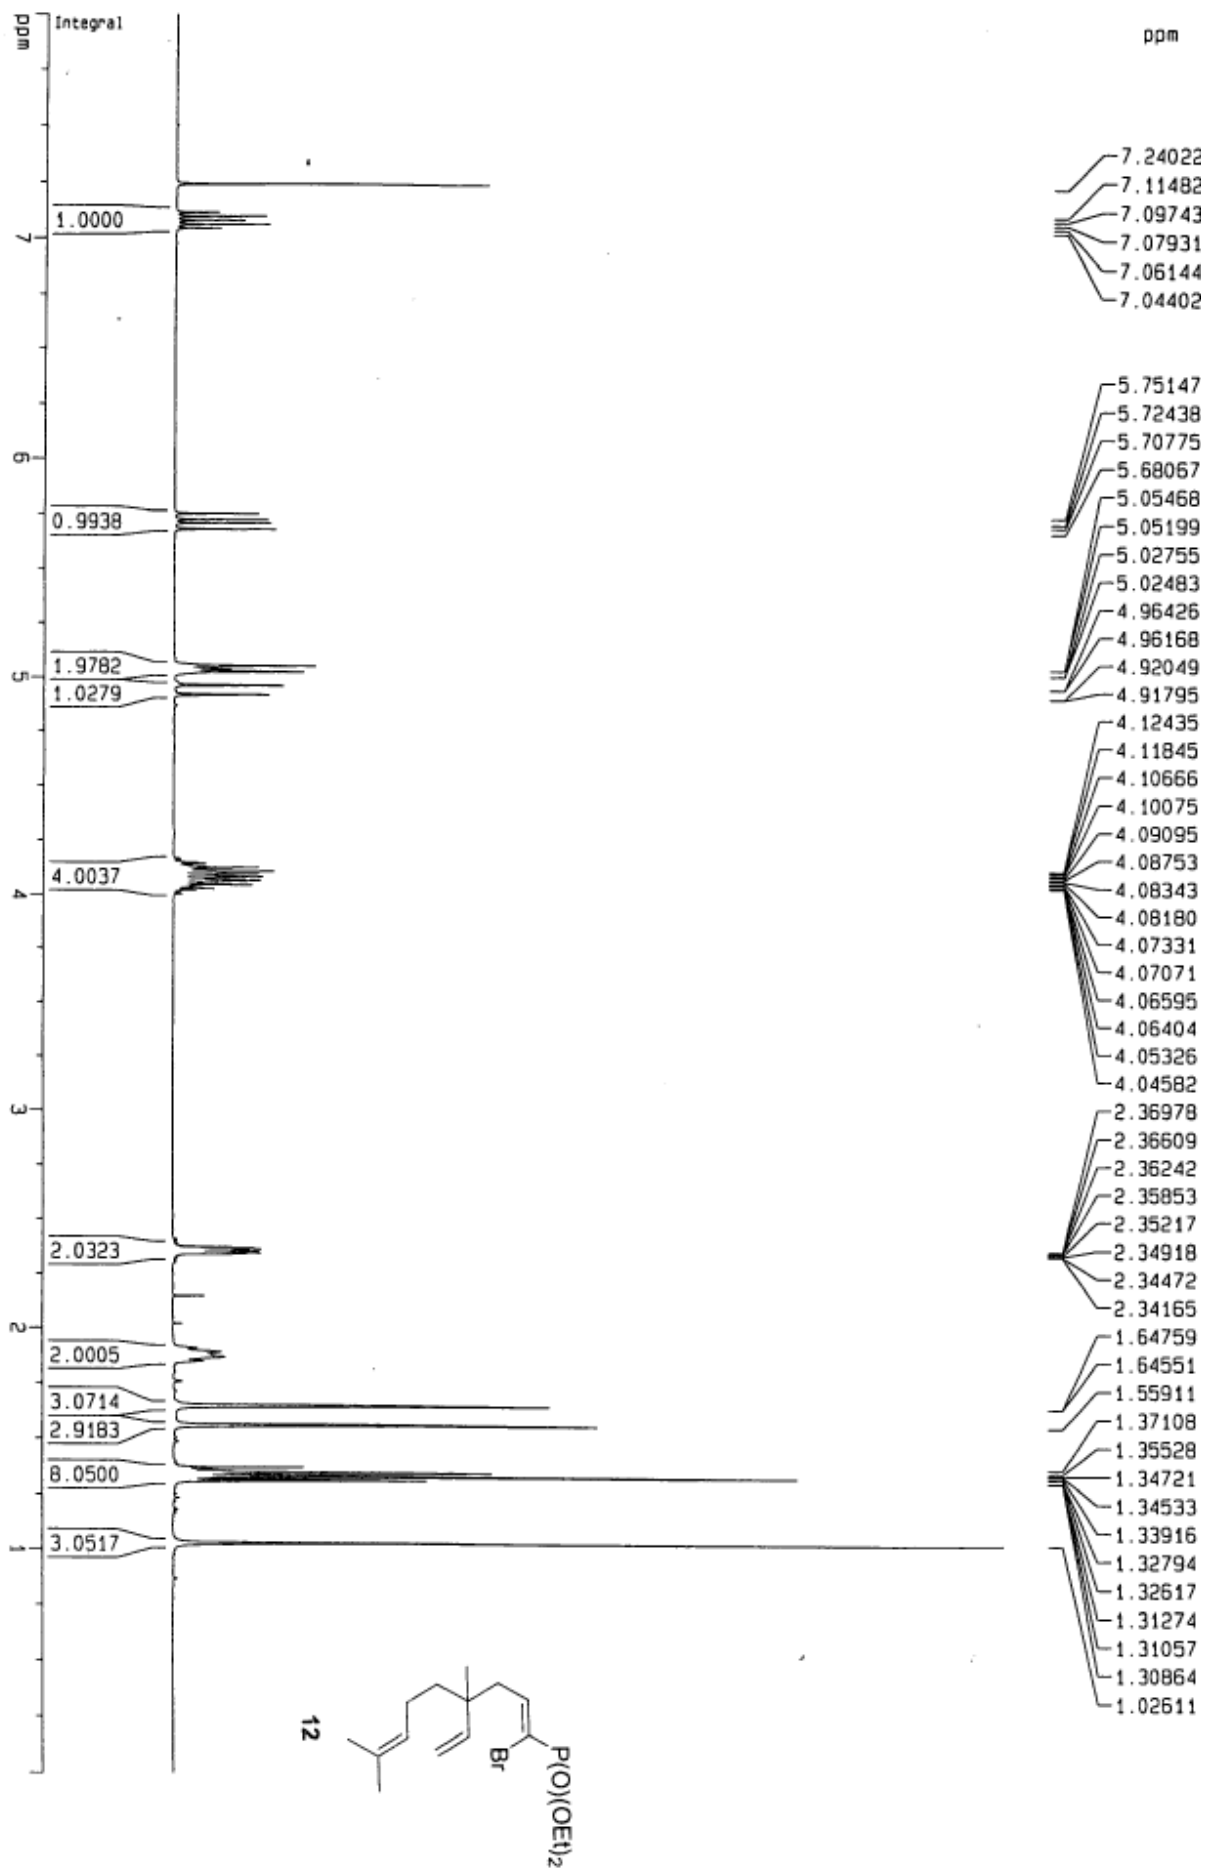

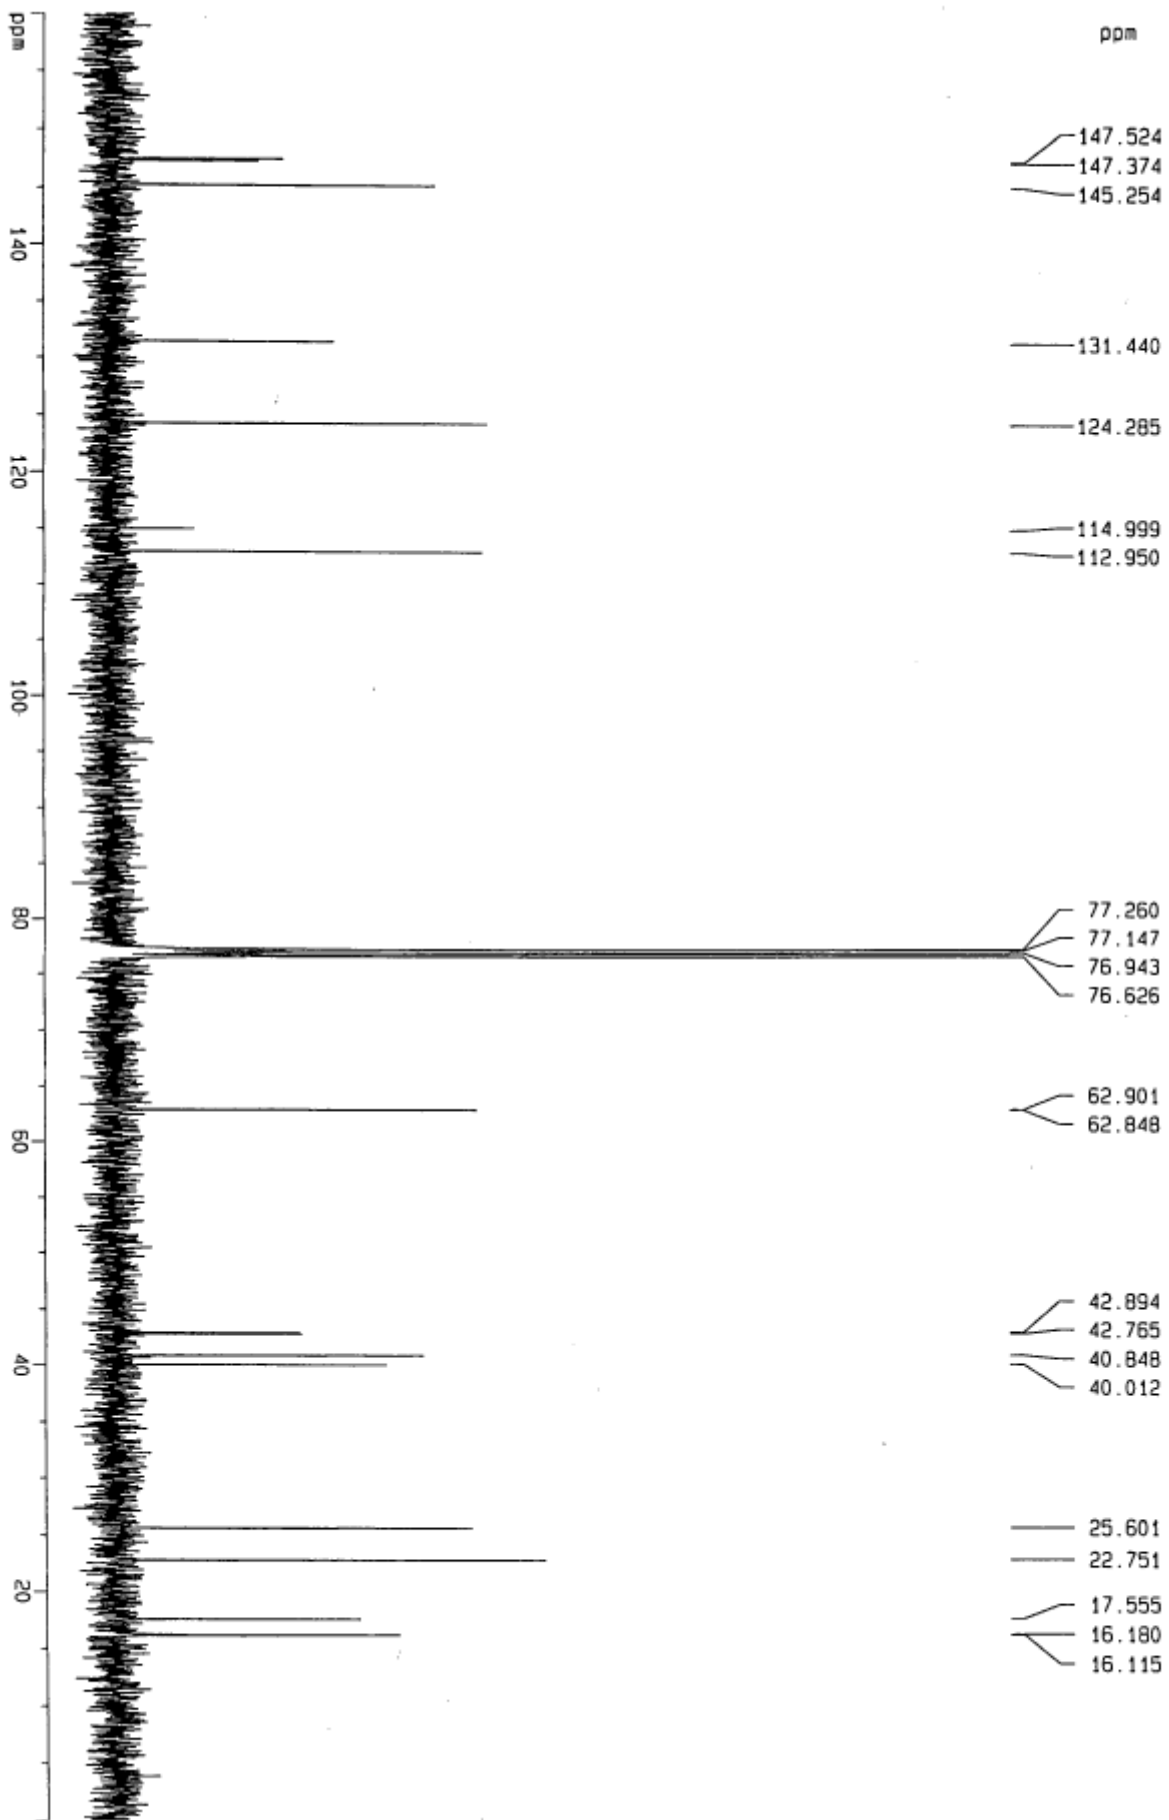



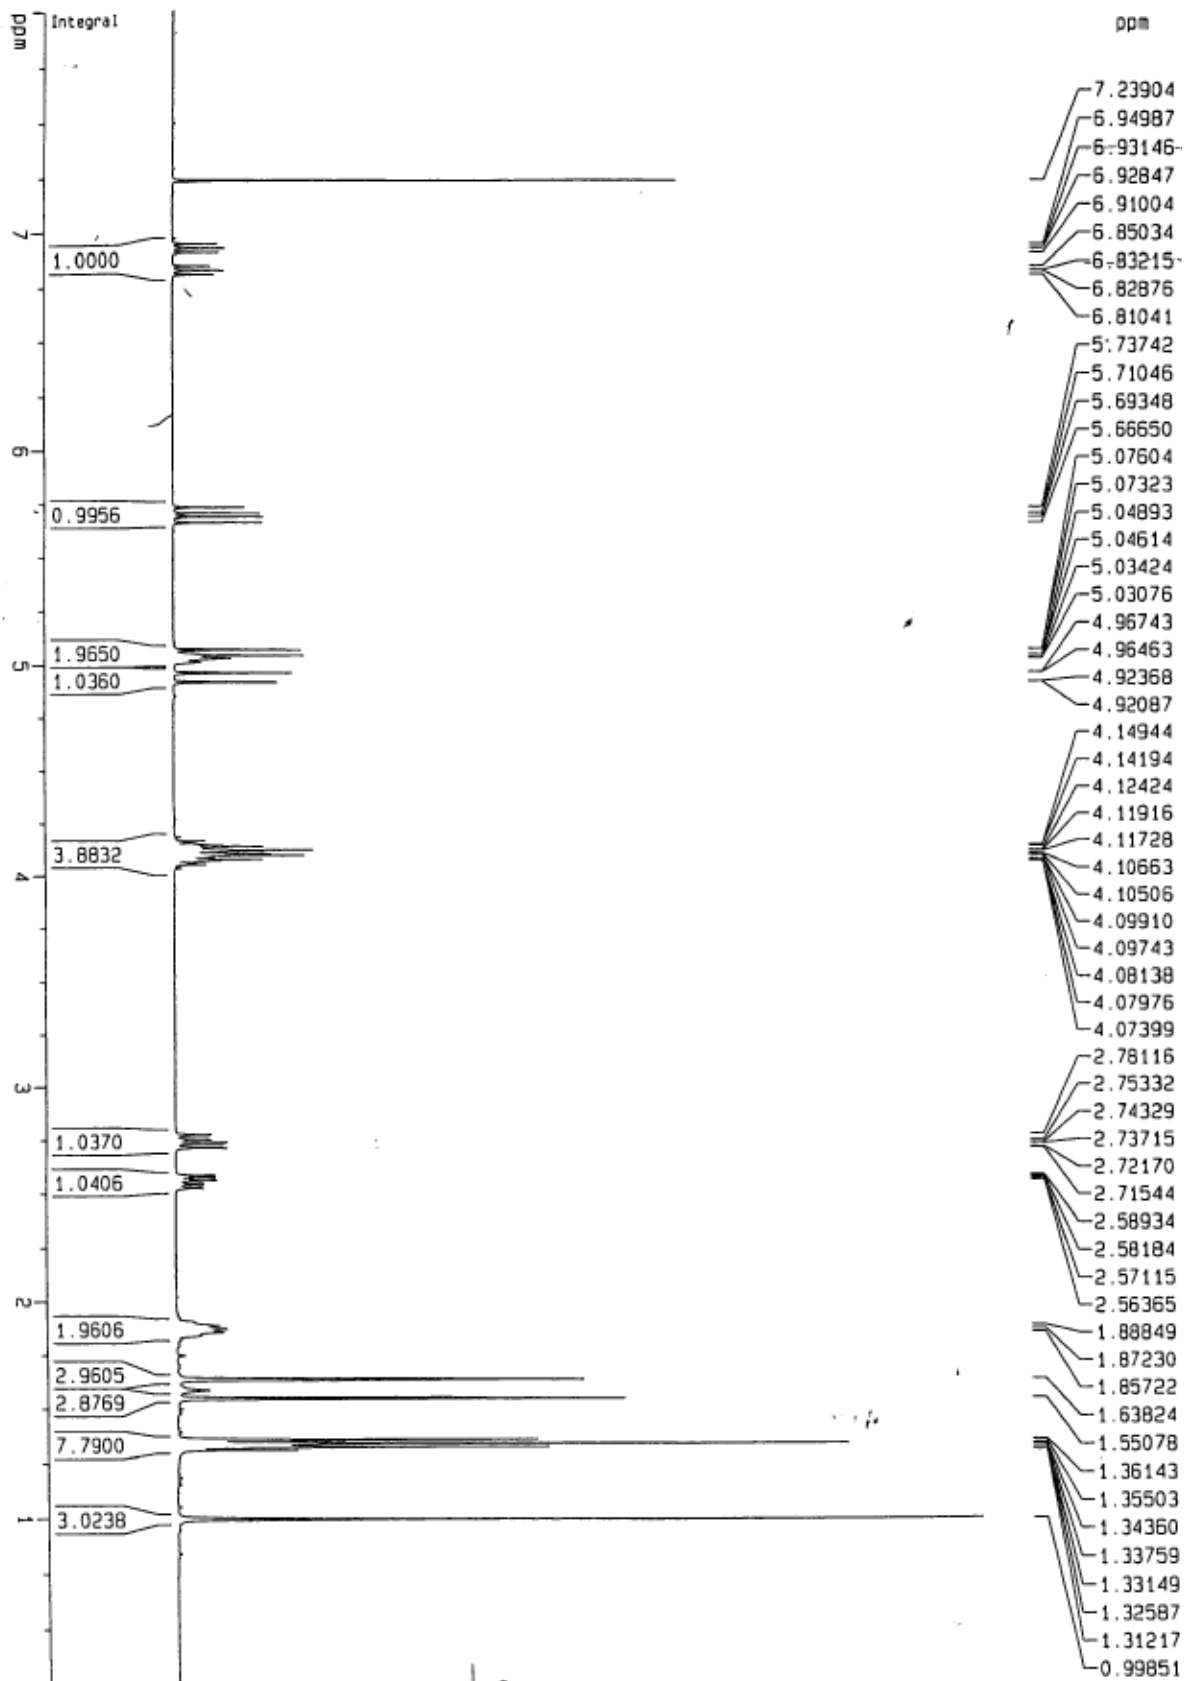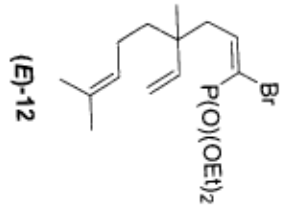

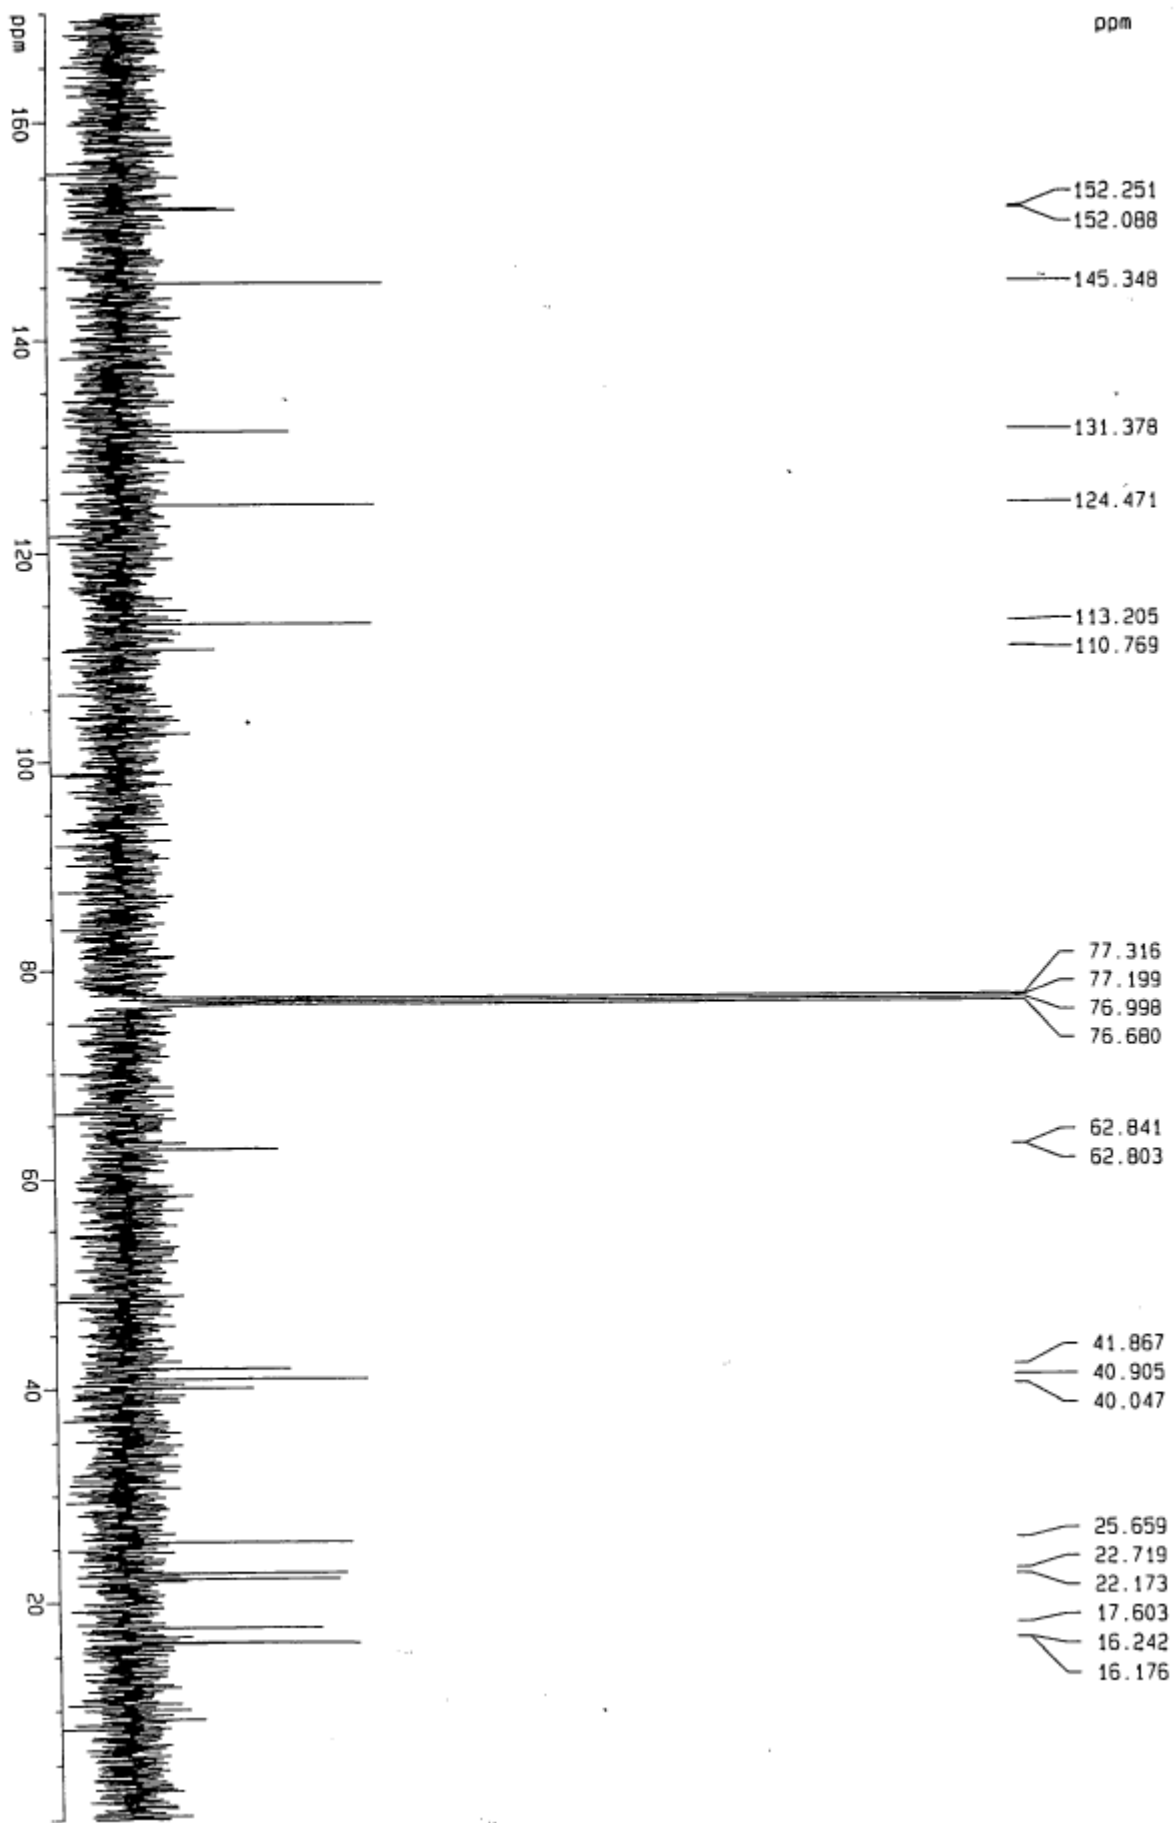

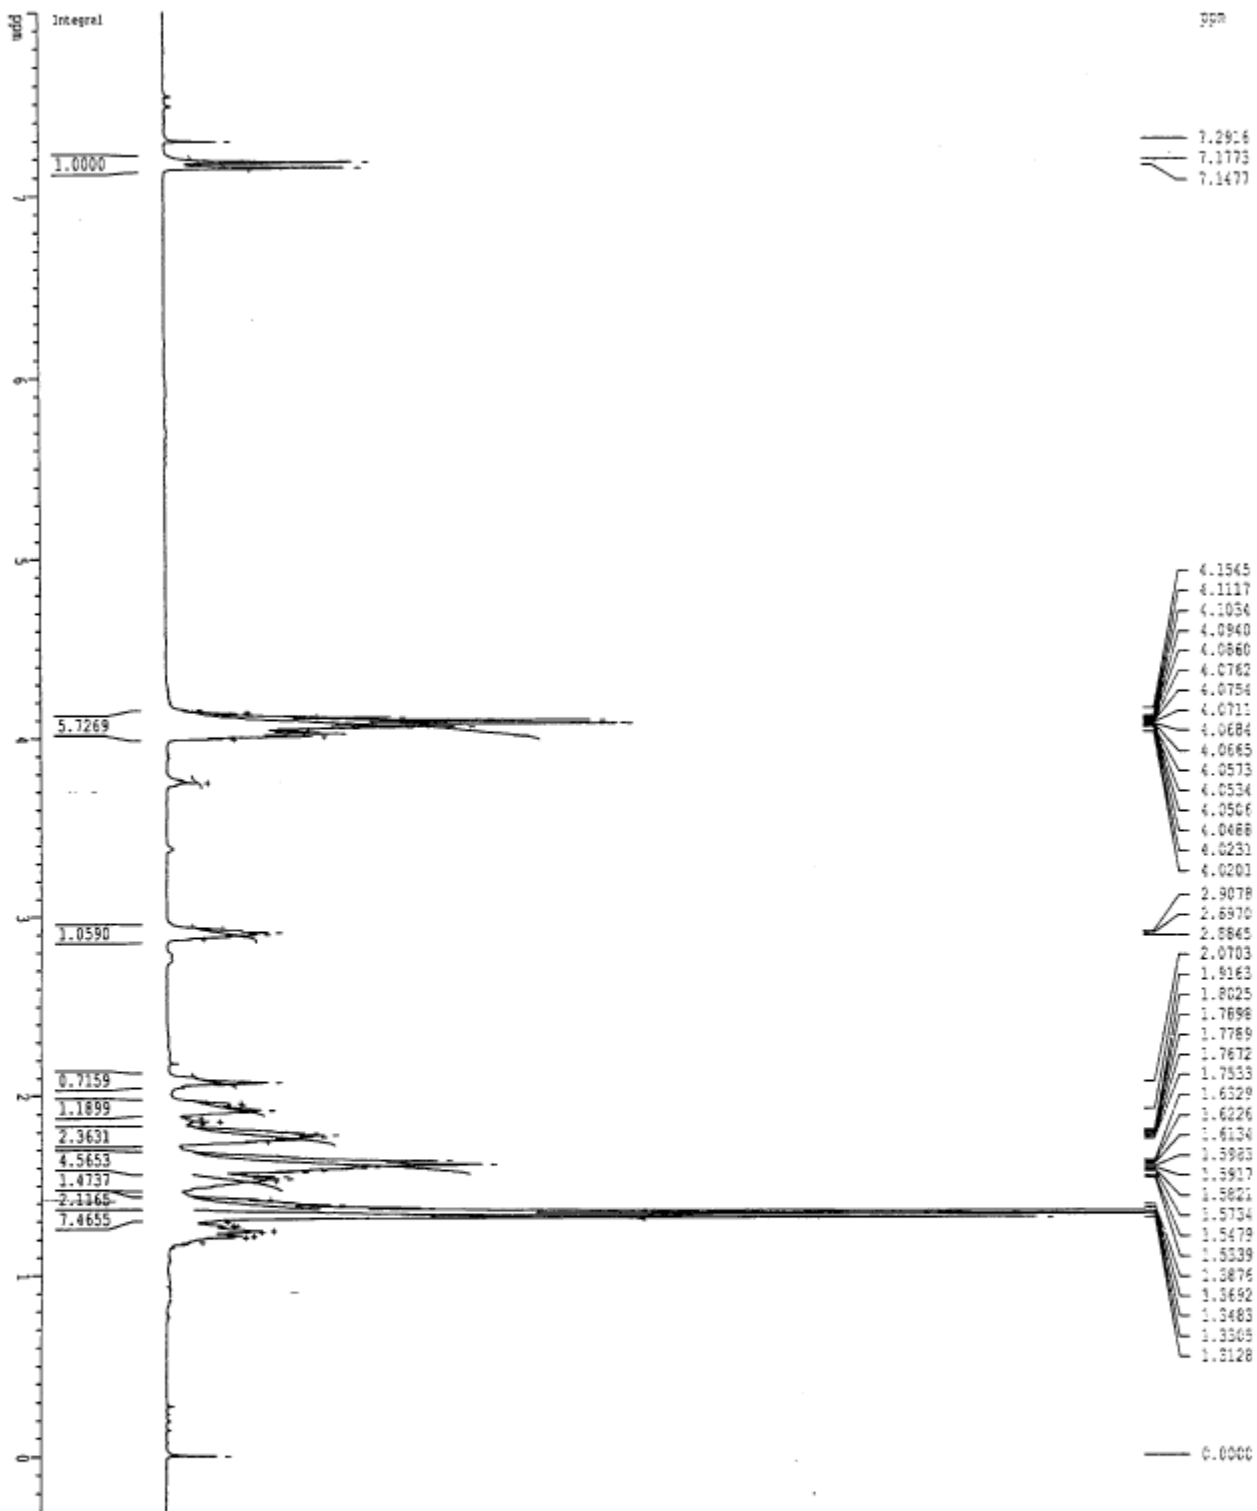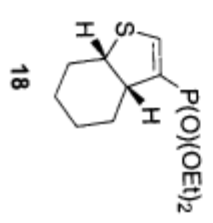

Current Data Parameters  
 NAME 03qyno  
 EXPMO 4532  
 PROCNO 1  
 F2 - Acquisition Parameters  
 Date\_ 2010/04/26  
 Time 19:35  
 INSTRUM spect  
 PROBD 5 mm BBO BB-  
 PULPROG zg30  
 TO 65336  
 SOLVENT CDCl3  
 NS 16  
 DS 2  
 SMI 8150.825 Hz  
 FREQS 0.129498 Hz  
 AQ 3.9715316 sec  
 RG 101.6  
 LW 60.600 unsec  
 DE 6.00 unsec  
 TE 300.2 K  
 D1 1.00000000 sec  
 CHANNEL f1  
 NUCL1 13  
 P1 7.90 unsec  
 PL1 -6.00 dB  
 SFO1 400.1324710 MHz  
 F2 - Processing parameters  
 SI 31758  
 SF 400.1299775 MHz  
 KW DM  
 SSB 0  
 LB 0.30 Hz  
 GB 0  
 PC 1.00  
 10 NMR plot parameters  
 CX 30.00 cm  
 FIP 8.000 ppm  
 F1 3201.04 Hz  
 F2F -0.300 ppm  
 F2 -128.04 Hz  
 RFMHZ 0.21667 ppm/cm  
 RECH 110.76244 Hz/cm

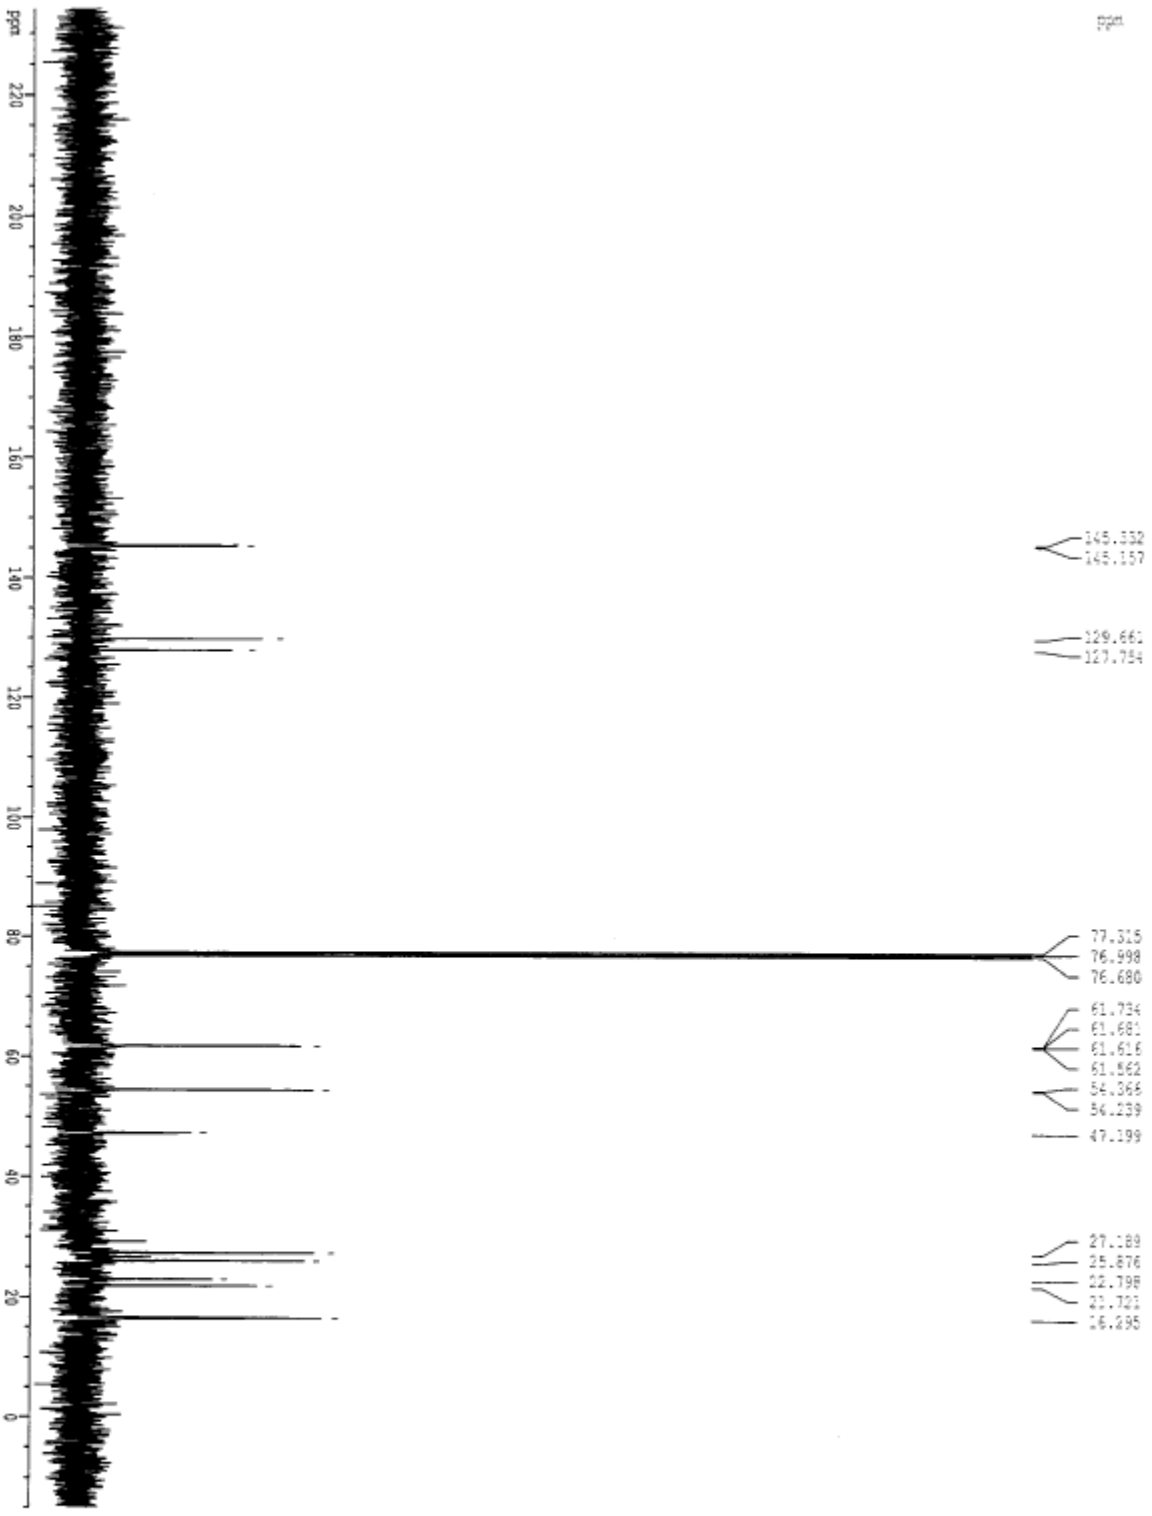

Current Data Parameters  
 NAME 03aemo  
 EXNO 4533  
 PROCNO 1

F2 - Acquisition Parameters  
 Date\_ 20030426  
 Time 19:55  
 INSTRUM dpx400  
 PNUSHD 5 mm BBO BB-  
 PULPROG zgpg30  
 TD 65536  
 SOLVENT CDCl3  
 NS 256  
 DS 2  
 SMH 25062.656 Hz  
 FIDRES 0.382426 Hz  
 AQ 1.3074932 sec  
 RG 14596.5  
 BW 19.950 usec  
 DE 6.00 usec  
 TE 300.0 K  
 D1 2.00000000 sec  
 d11 0.03000000 sec

\*\*\*\*\* CHANNEL f1 \*\*\*\*\*  
 NUCL1 13C  
 P1 7.90 usec  
 PL1 -2.00 dB  
 SFO1 100.6237959 MHz

\*\*\*\*\* CHANNEL f2 \*\*\*\*\*  
 CHPROG2 waltz16  
 NUCL2 1H  
 PCPP2 80.00 usec  
 PL2 -6.00 dB  
 PL12 15.50 dB  
 SFO2 400.1316905 MHz

F2 - Processing parameters  
 SI 32768  
 SF 100.6127759 MHz  
 WDM EM  
 SSB 0  
 LB 1.00 Hz  
 GB 0  
 PC 1.40

ID NMR plot parameters  
 CX 30.00 cm  
 F1P 234.079 ppm  
 F1 23551.31 Hz  
 F2P -151.021 ppm  
 F2 -1511.34 Hz  
 FPKCN 8.30334 ppm/cm  
 HPCN 835.42188 Hz/cm

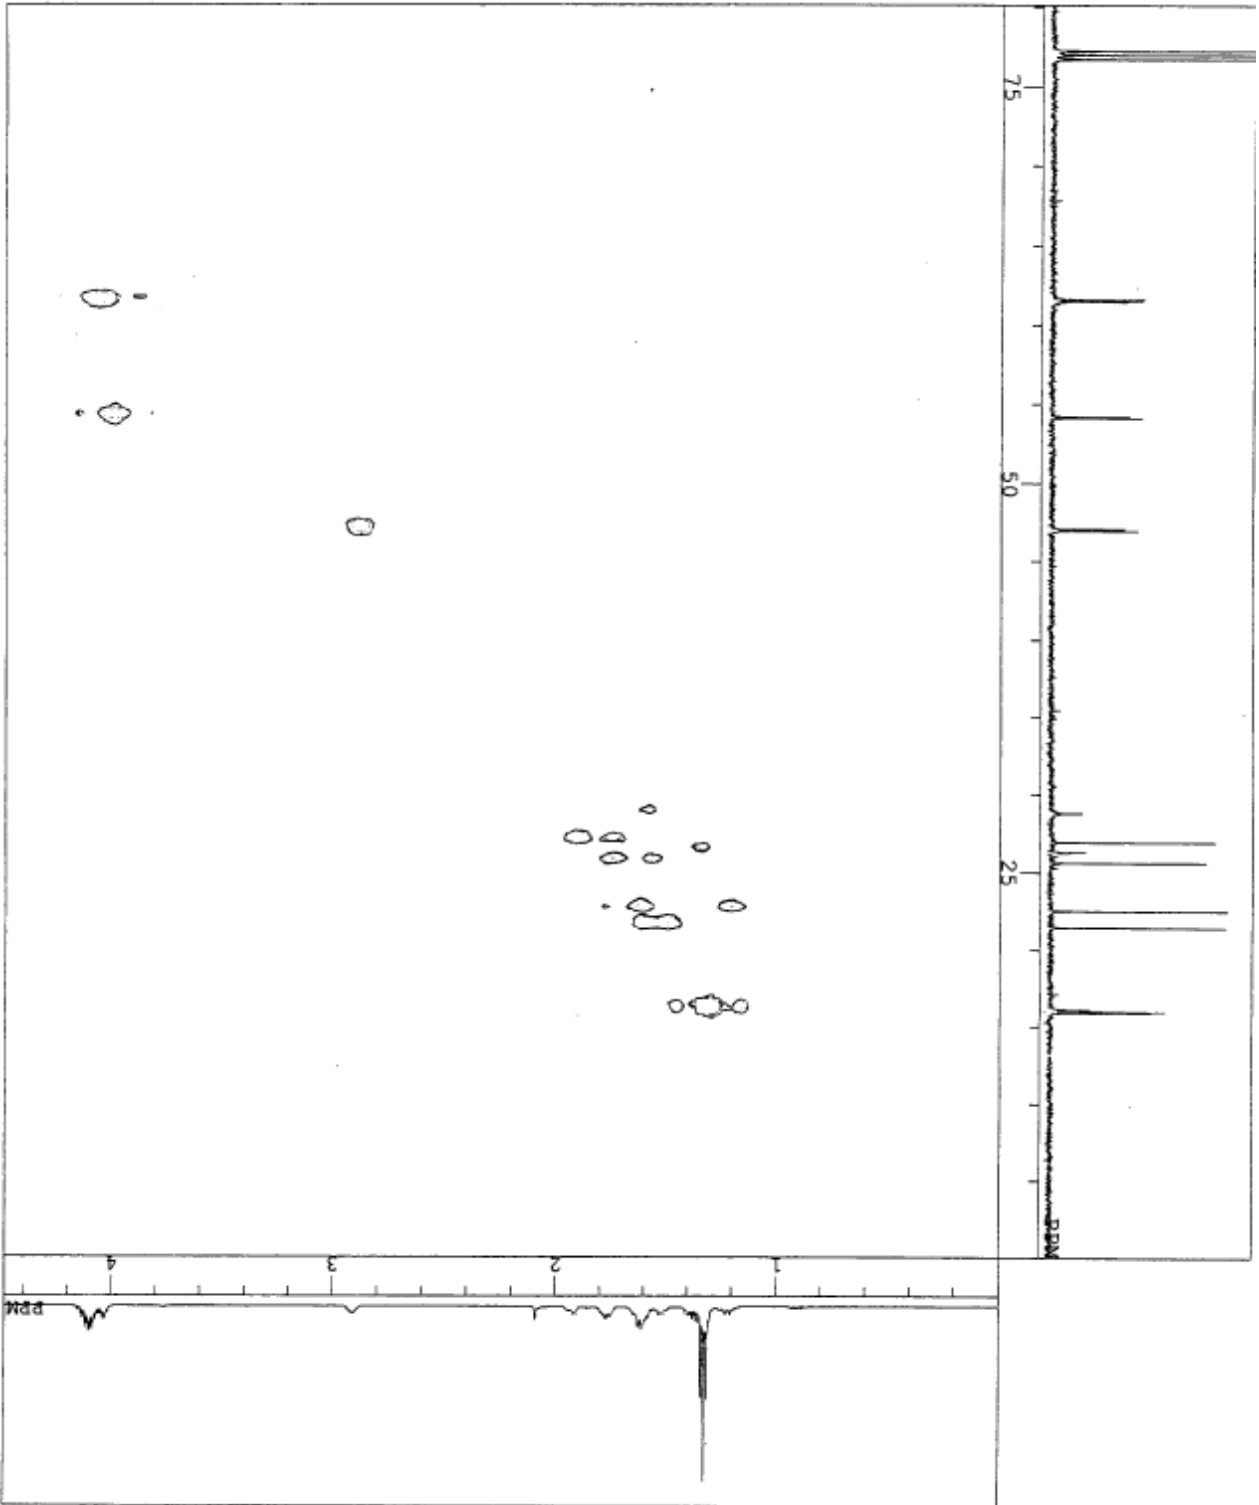

DEFILE C:\NMRdata\00kuni  
 COMNT 1a453  
 DATIM Mon Apr 28 14:29:  
 EXMOD CHSHF  
 OBNUC 13C  
 OBFRQ 125.65 MHz  
 OBSEF 0.00 KHz  
 OBFIN 127892.80 Hz  
 POINT 512  
 FREQU 25125.63 Hz  
 CLPNT 256  
 TODAT 256  
 CLFRO 5316.60 Hz  
 SCANS 32  
 ACQTM 0.0204 sec  
 PD 1.2000 sec  
 PW1 9.00 usec  
 PW2 26.00 usec  
 PW3 14.00 usec  
 P11 80.0000 msec  
 P12 1.0000 msec  
 P13 20.0000 msec  
 IRNUC 1H  
 CTEMP 22.3 C  
 SLVNT CDCl3  
 EXREF 77.00 ppm  
 CLEXR 0.00  
 RGAIN 30

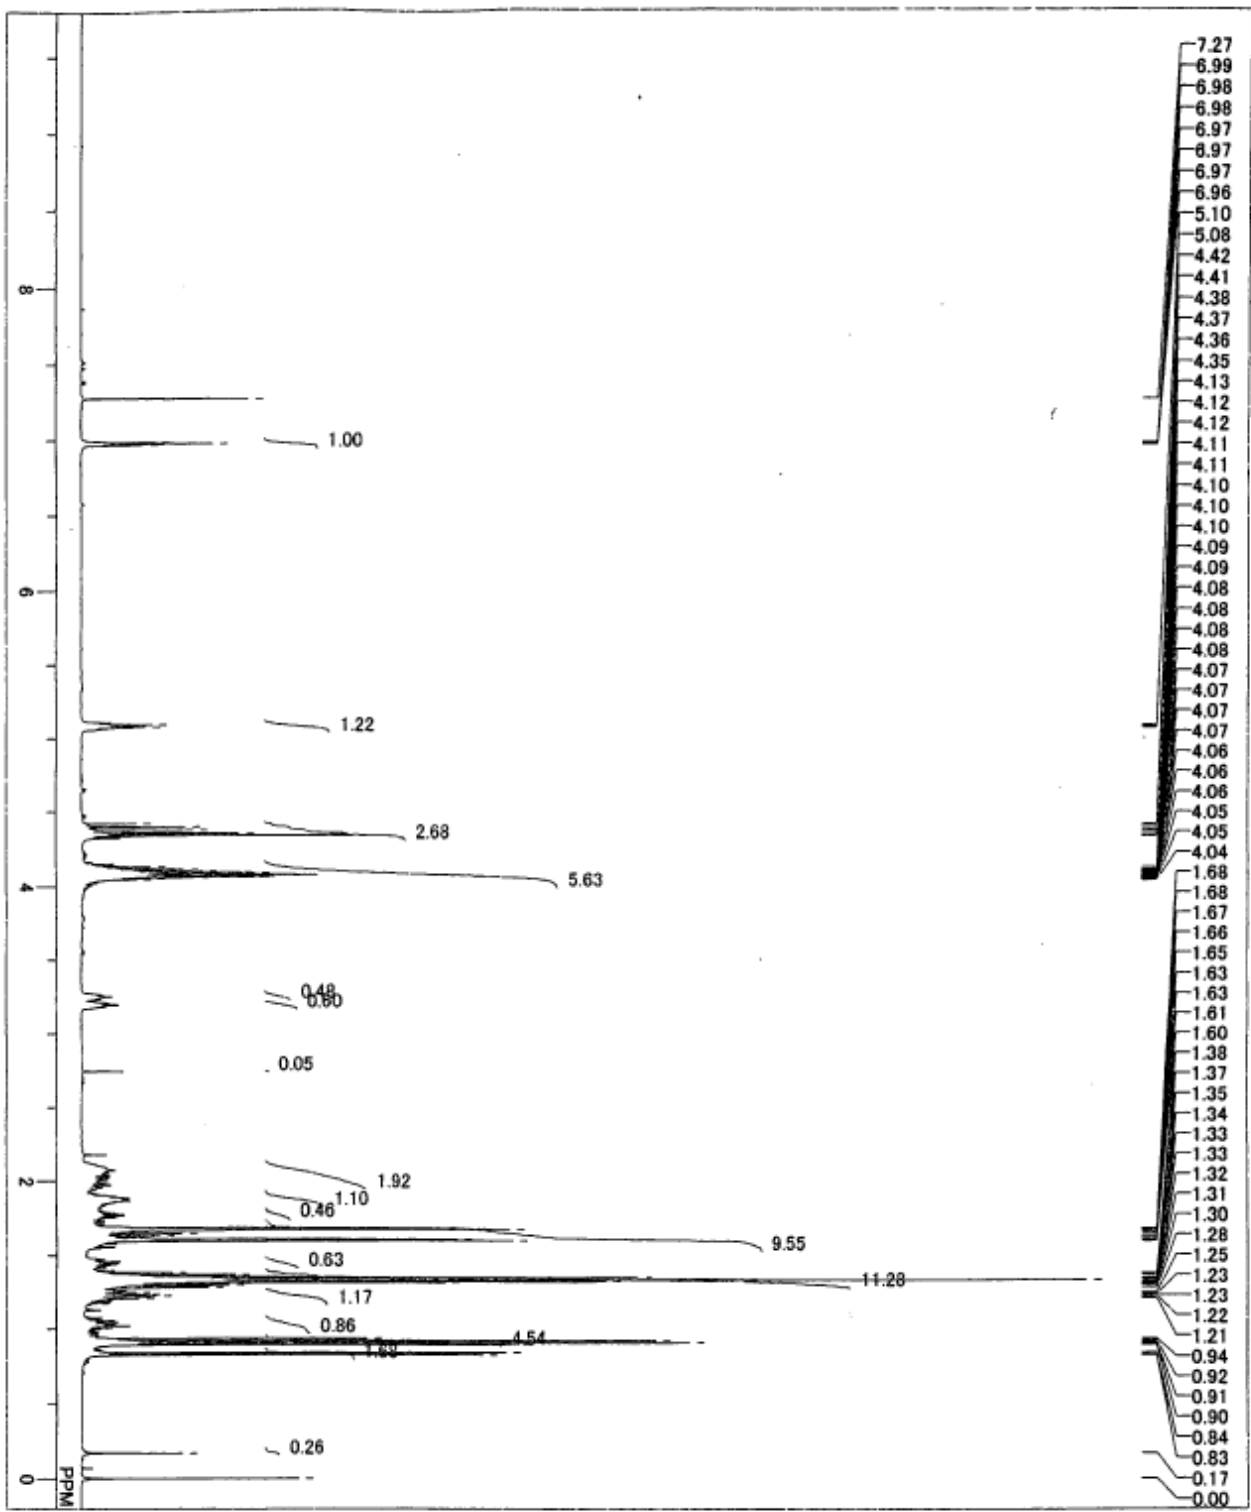

MENUF  
ONUC  
OBRQC  
OBRFG  
OBRFN  
PWT  
DEADT  
PREDL  
INMT  
POINT  
SAMP0  
TIMES  
DUMMY  
FREQU  
FILTR  
DELAY  
ACQTM  
PD-  
ADBIT  
RGAIN  
BF  
T1  
T2  
T3  
T4  
EXMOD  
EXPCM  
IRNUC  
IRFRQ  
IRFIN  
IRRPW  
IRATN  
DFILE  
SHMFL  
CTEMP  
LKFN  
LKLEV  
LGAIN  
LKPHS  
LKSIG  
CSPED  
FLDC  
FLDF

NON  
1H 500.00 MHz  
162410.00 Hz  
7.00 usec  
56.50 usec  
0.20000 msec  
10.00000 msec  
32768  
32768  
32  
1  
10000.00 Hz  
5000 Hz  
40.00 usec  
3.2768 sec  
2.0000 sec  
16  
15  
0.15 Hz  
0.00  
0.00  
90.00  
100.00  
SINGL  
Single pulse  
1H 500.00 MHz  
162410.00 Hz  
50 usec  
511  
25.5 g  
134.0 Hz  
200  
26  
193  
2057  
11 Hz

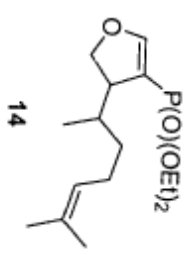

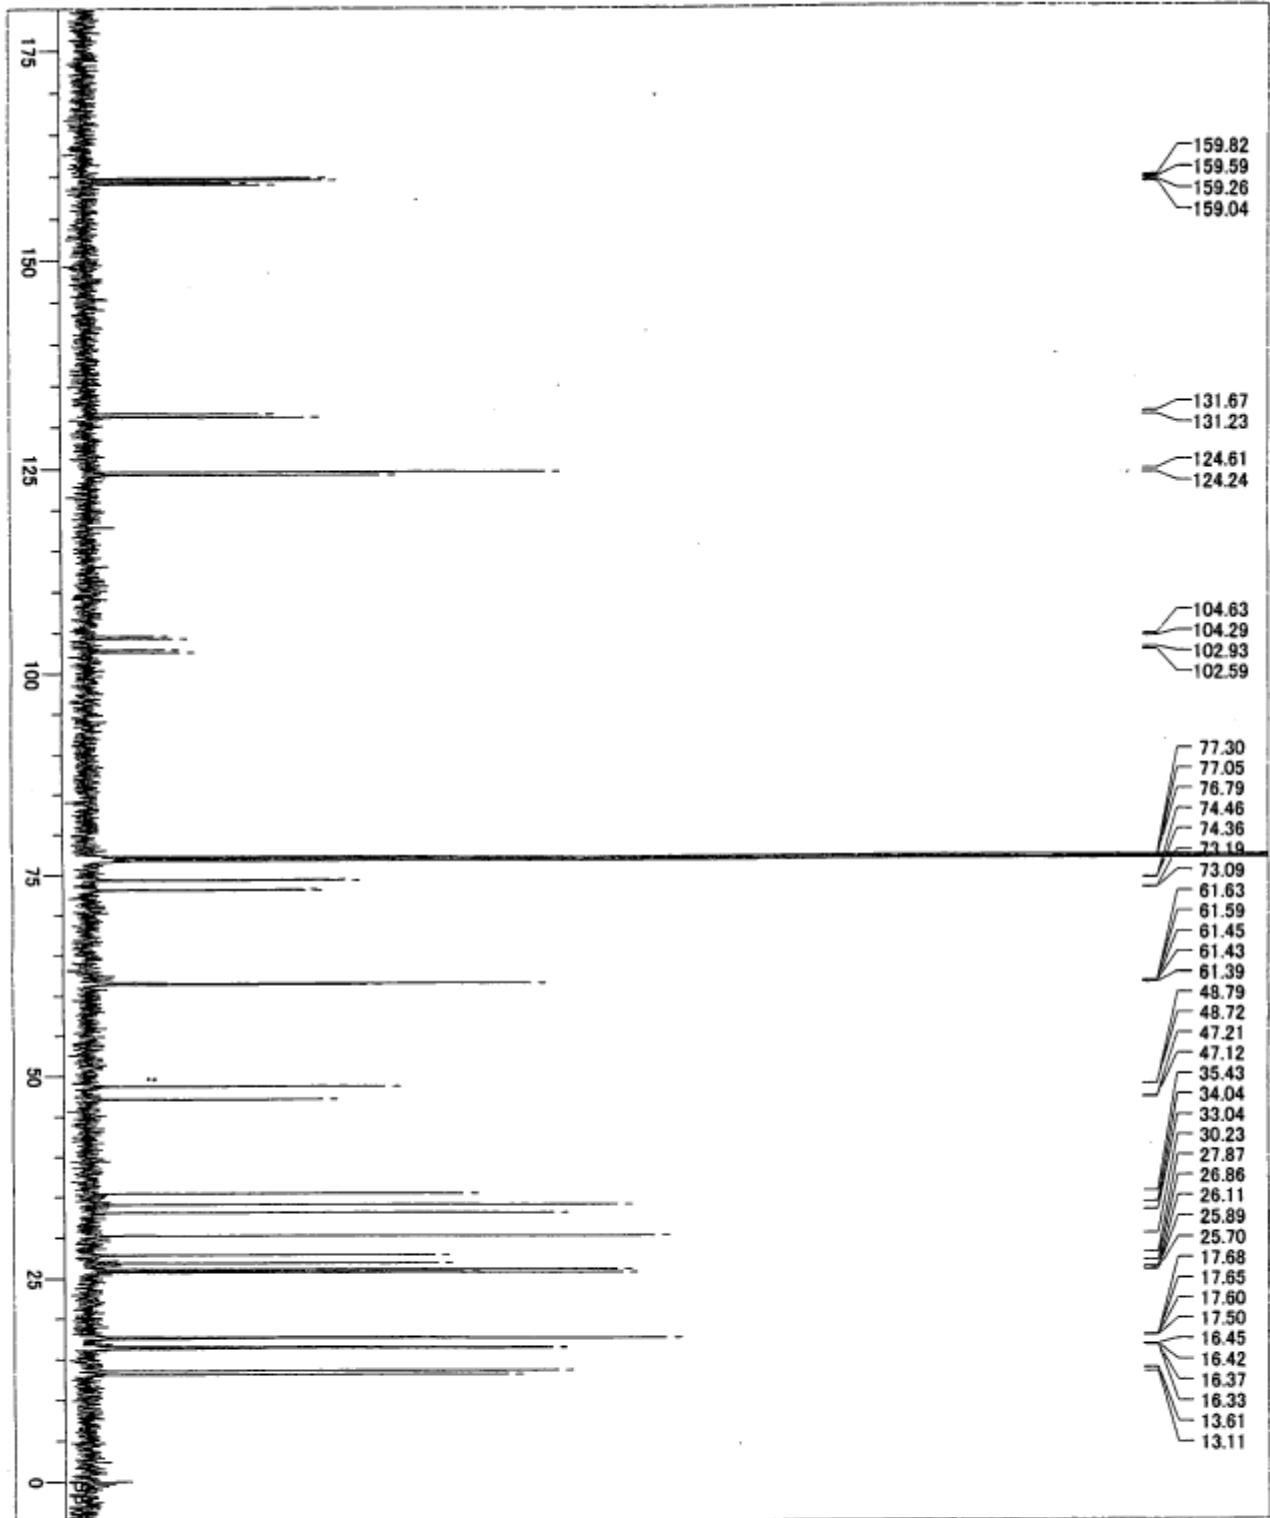

MNUF  
 OBNUC 13C  
 OBFRO 125.65 MHz  
 OBFIN 127958.00 Hz  
 PWI 4.50 usec  
 DEADT 15.45 usec  
 PREDL 0.20000 msec  
 INWT 10.00000 msec  
 POINT 32768  
 SAMPO 32768  
 TIMES 1200  
 DUMMY 1  
 FREQU 33898.30 Hz  
 FILTR 16950 Hz  
 DELAY 11.80 usec  
 ACOTM 0.9667 sec  
 PD 2.0000 sec  
 ADBIT 16  
 RGAIN 29  
 BF 1.20 Hz  
 T1 0.00  
 T2 0.00  
 T3 90.00  
 T4 100.00  
 EXMOD SINGL  
 EXPCM Single pulse  
 IHN 1H  
 IRRUC 500.00 MHz  
 IRRRO 162410.00 Hz  
 IRRPW 50 usec  
 IRATN 511  
 DFILE C:\NMR\data\k00k  
 SHMFL THSAT140MM03#  
 CTEMP 25.9 °C  
 LKFIN 134.0 Hz  
 LKLEV 200  
 LGAIN 26  
 LKPHS 193  
 LKSIG 2062  
 CSPED 11 Hz  
 FLDC  
 FLDF

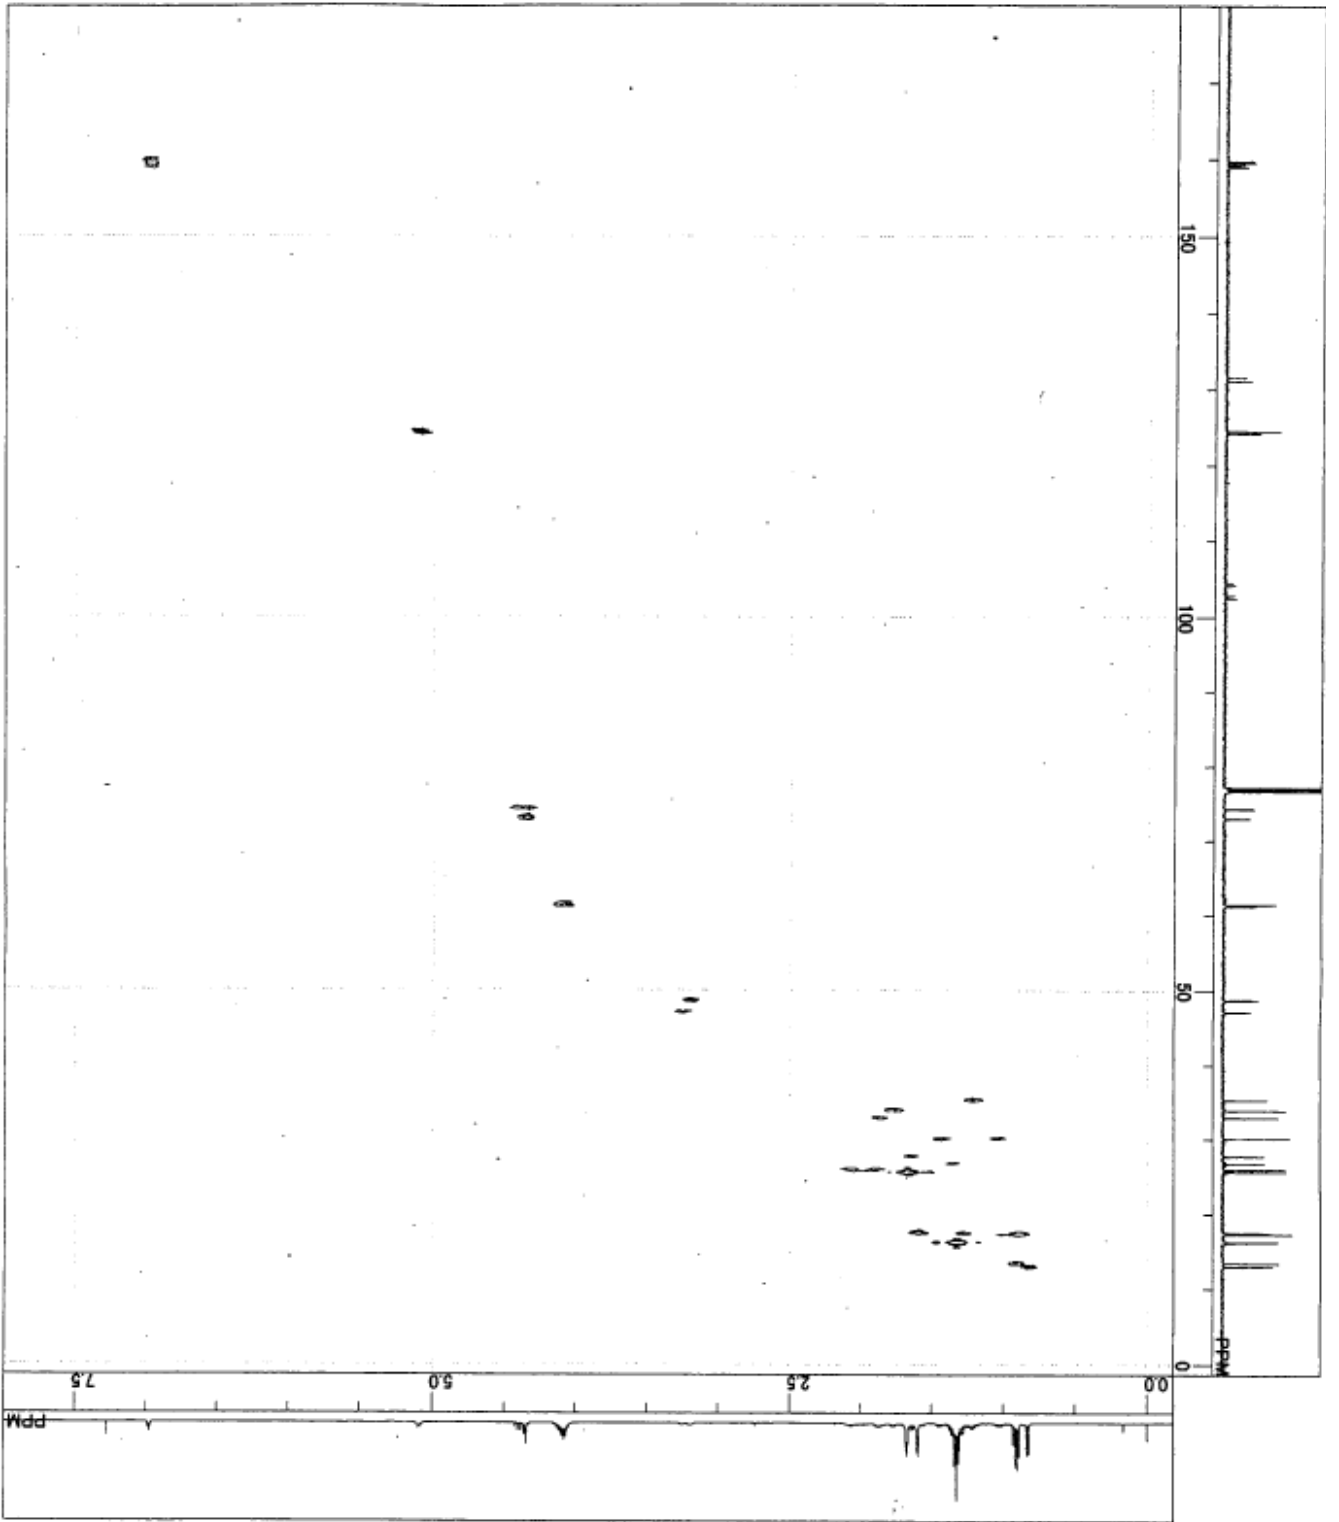

D:\NM\Rdata\work  
 CHSHF  
 IRLV2  
 3gerani-thio-o  
 13C  
 0.00 KHz  
 511  
 25390.71 Hz  
 1024  
 39.4000 usec  
 5316.32 Hz  
 256  
 188.10 usec  
 256  
 32  
 32  
 0.0403 sec  
 1.2000 sec  
 9.00 usec  
 26.00 usec  
 14.60 usec  
 80.0000 msec  
 1.0000 msec  
 20.0000 msec  
 1H  
 0.00 KHz  
 511  
 50 usec  
 1H  
 0.00 KHz  
 511  
 0 usec  
 24.8 c  
 14 Hz  
 CDCL3  
 1  
 0.00 Hz  
 CXS  
 XE  
 25390.71 Hz  
 CXE  
 THTOP  
 THBTM  
 DEADT  
 DELAY  
 CINWT  
 5.00 usec  
 15.36 usec  
 10.00 usec



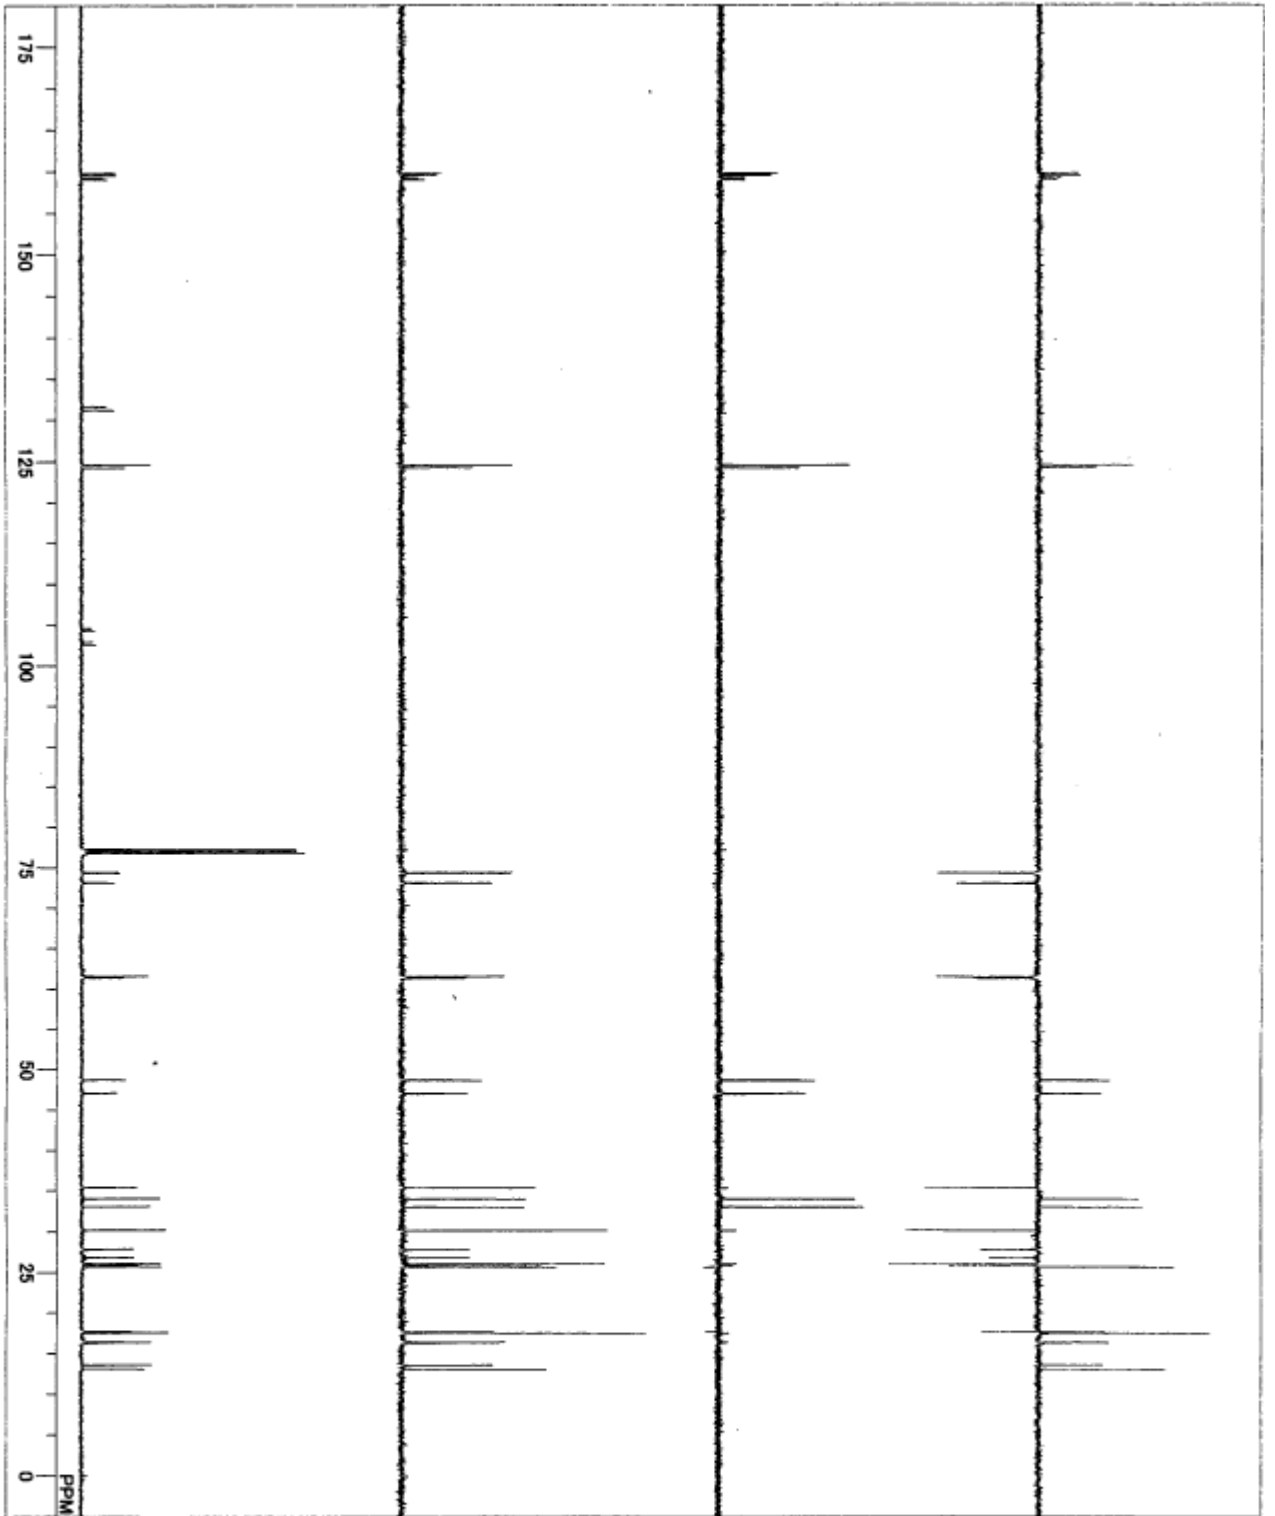

MENUF  
 OBNUC 13C  
 OBFRQ 125.65 MHz  
 OBRFN 127958.00 Hz  
 PWT 4.50 usec  
 DEADT 15.45 usec  
 PREDL 0.20000 msec  
 INIWT 10.0000 msec  
 POINT 32768  
 SAMPO 32768  
 TIMES 1200  
 DUMMY 1  
 FREQU 33898.30 Hz  
 FILTR 16950 Hz  
 DELAY 11.80 usec  
 ACOTM 0.9667 sec  
 PD 2.0000 sec  
 ADBIT 16  
 RGAIN 29  
 BF 1.20 Hz  
 T1 0.00  
 T2 0.00  
 T3 90.00  
 T4 100.00  
 EXMOD SINGL  
 EXPCM Single pulse  
 IRNUC 1H  
 IRFRQ 500.00 MHz  
 IRFIN 162410.00 Hz  
 IRPPW 50 usec  
 IRATTN 511  
 DFILE C:\NMR\data\k00ku  
 SHMFL THSAT140MM03ger  
 CTEMP 25.9 °C  
 LKEN 134.0 Hz  
 LKLEV 200  
 LGAIN 26  
 LKPHS 193  
 LKSIG 2082  
 CSPED 11 Hz  
 FLDC  
 FILD

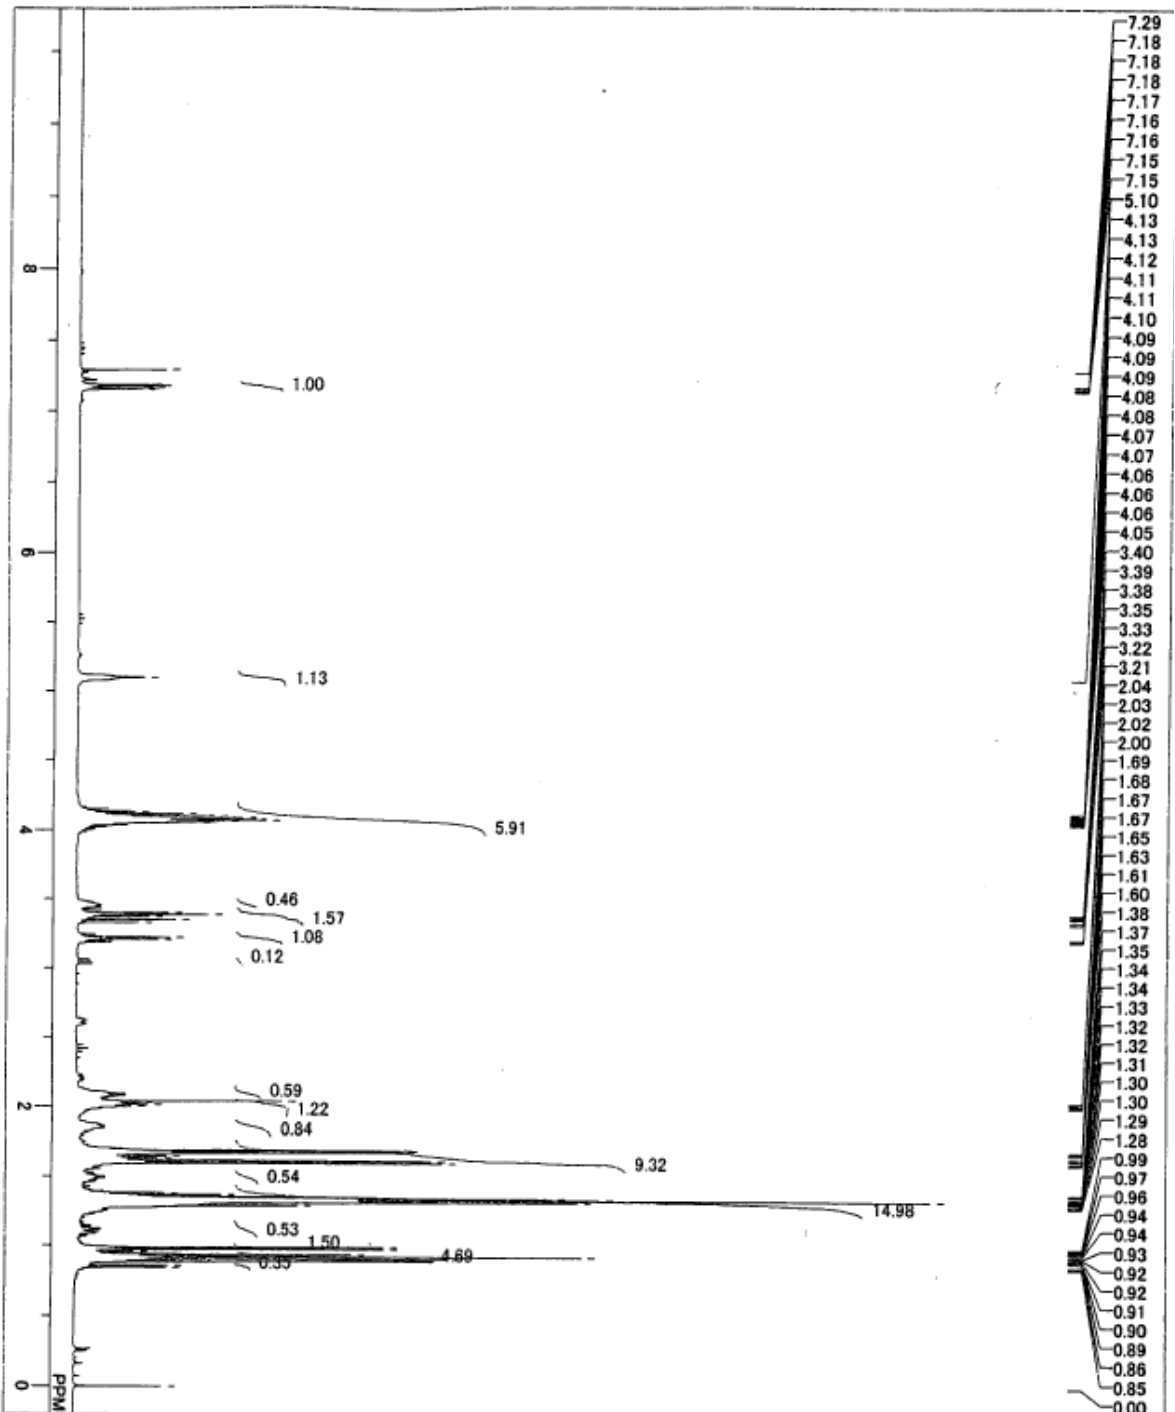

MENUF NON  
 OBNUC 1H 500.00 MHz  
 OBFRQ 162410.00 Hz  
 OBFIN 7.00 usec  
 PW1 56.50 usec  
 DEADT 0.20000 msec  
 PREDL 10.00000 msec  
 INWIT 32768  
 POINT 32768  
 SAMPO 32768  
 TIMES 32  
 DUMINY 1  
 FREOU 10000.00 Hz  
 FILTR 5000 Hz  
 DELAY 40.00 usec  
 ACQTM 3.2768 sec  
 PD 2.00000 sec  
 ADBIT 16  
 RGAIN 10  
 BF 0.15 Hz  
 T1 0.00  
 T2 0.00  
 T3 90.00  
 T4 100.00  
 EXMOD SINGL  
 EXPCM Single pulse  
 IRNUC 1H 500.00 MHz  
 IRFRQ 162410.00 Hz  
 IRFEN 50 usec  
 IRRPW 50 usec  
 IRATN 511  
 DRFILE  
 SHMFL  
 C:\NMR\data\000\unimue\3\gerantl-thio-s11  
 THSA140MM03gerantl-thio-s  
 23.8 c  
 134.0 Hz  
 200  
 LGAIN 22  
 LKPHS 193  
 LKSIG 520  
 CSPED 14 Hz  
 FILDC

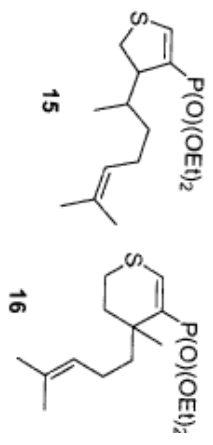

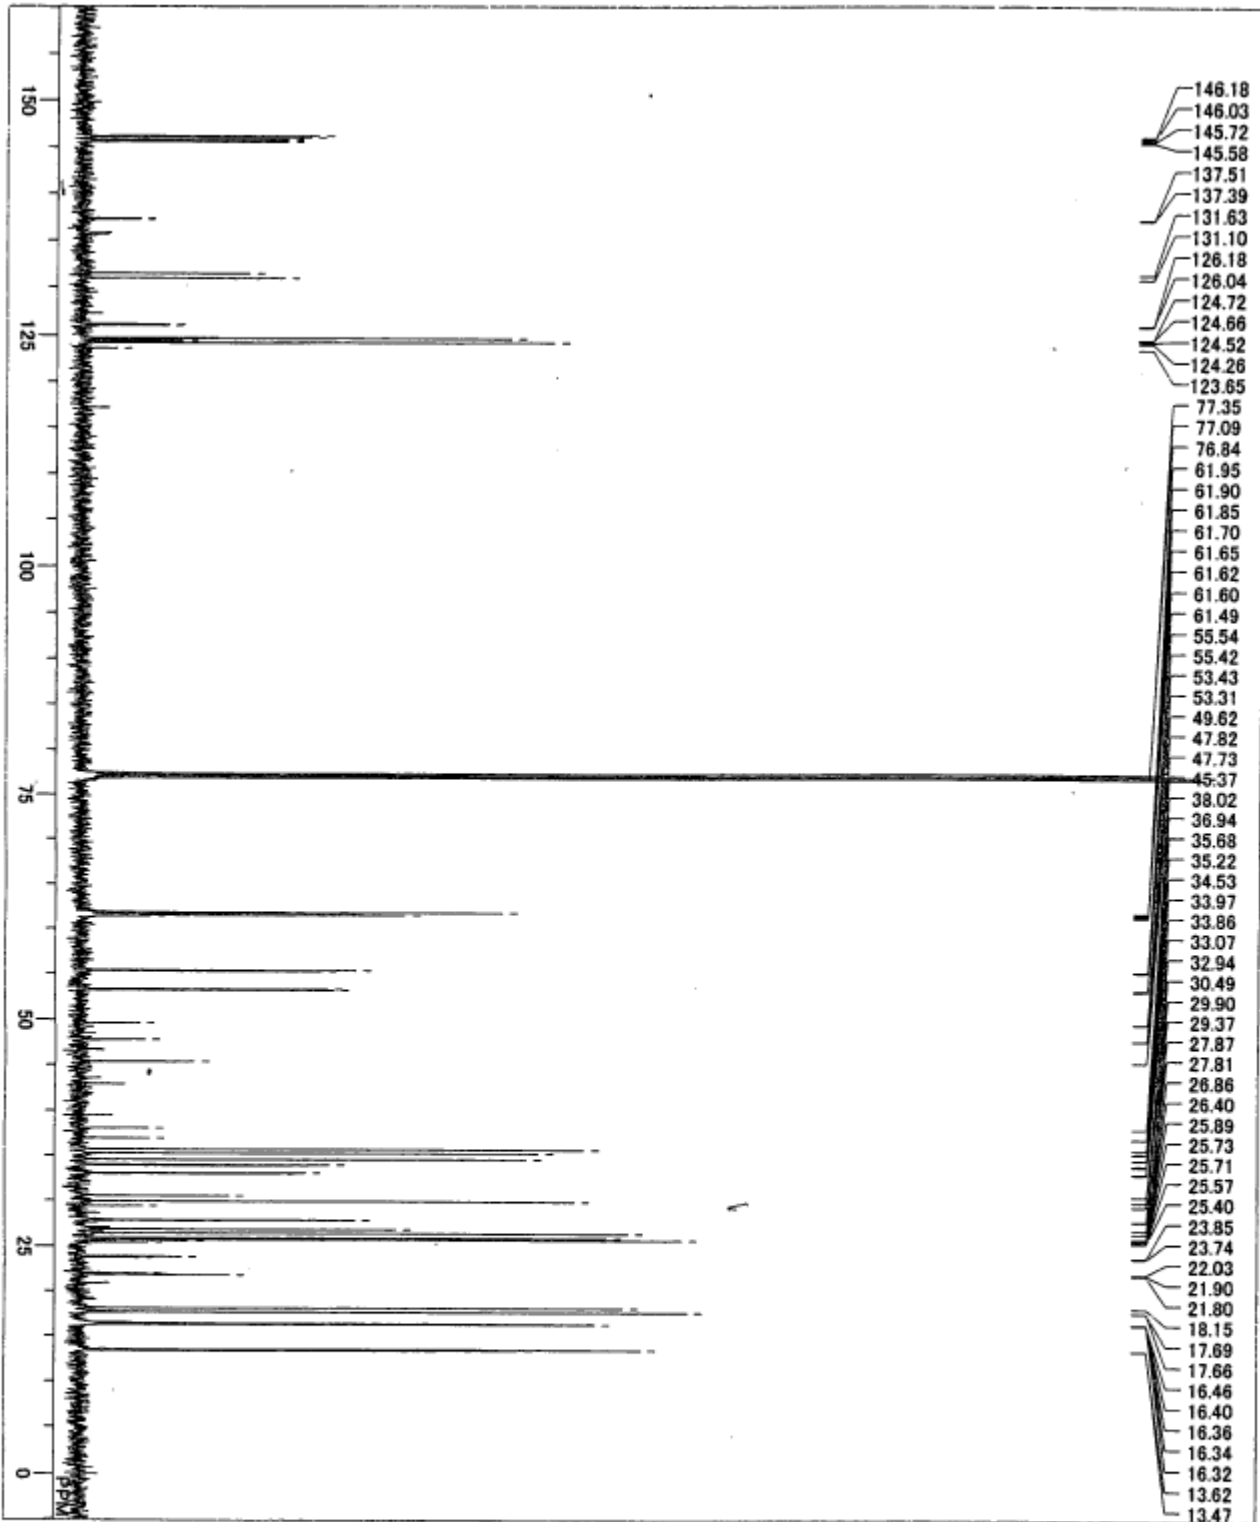

MENUF  
OBNUC  
OBFRQ  
OBFIN  
PW1  
DEADT  
PREDL  
INWTT  
POINT  
SAMP0  
TIMES  
DUMMY  
FREQU  
FILTR  
DELAY  
ACQTM  
PD  
ADBIT  
RGAIN  
BF  
T1  
T2  
T3  
T4  
EXMOD  
EXPCM  
IRNUC  
IRFR0  
IRFIN  
IRRPW  
IRATN  
DFILE  
SHMFL  
CTEMP  
LKFIN  
LKLEV  
LKLEV  
LGAIN  
LKPHS  
LKSIG  
CSPED  
FLDPC  
FLDPC

BCM  
130  
125.65 MHz  
127958.00 Hz  
4.50 usec  
15.45 usec  
0.20000 msec  
10.00000 msec  
32768  
512  
1  
33898.30 Hz  
16950 Hz  
11.80 usec  
0.9667 sec  
2.0000 sec  
16  
29  
1.00 Hz  
0.00  
0.00  
90.00  
100.00  
SINGL  
Single pulse  
IH  
500.00 MHz  
162410.00 Hz  
50 usec  
511  
C:\NMR\data\K00kuni  
THSAT40MM03.gena  
24.2 c  
134.0 Hz  
200  
22  
193  
521  
13 Hz

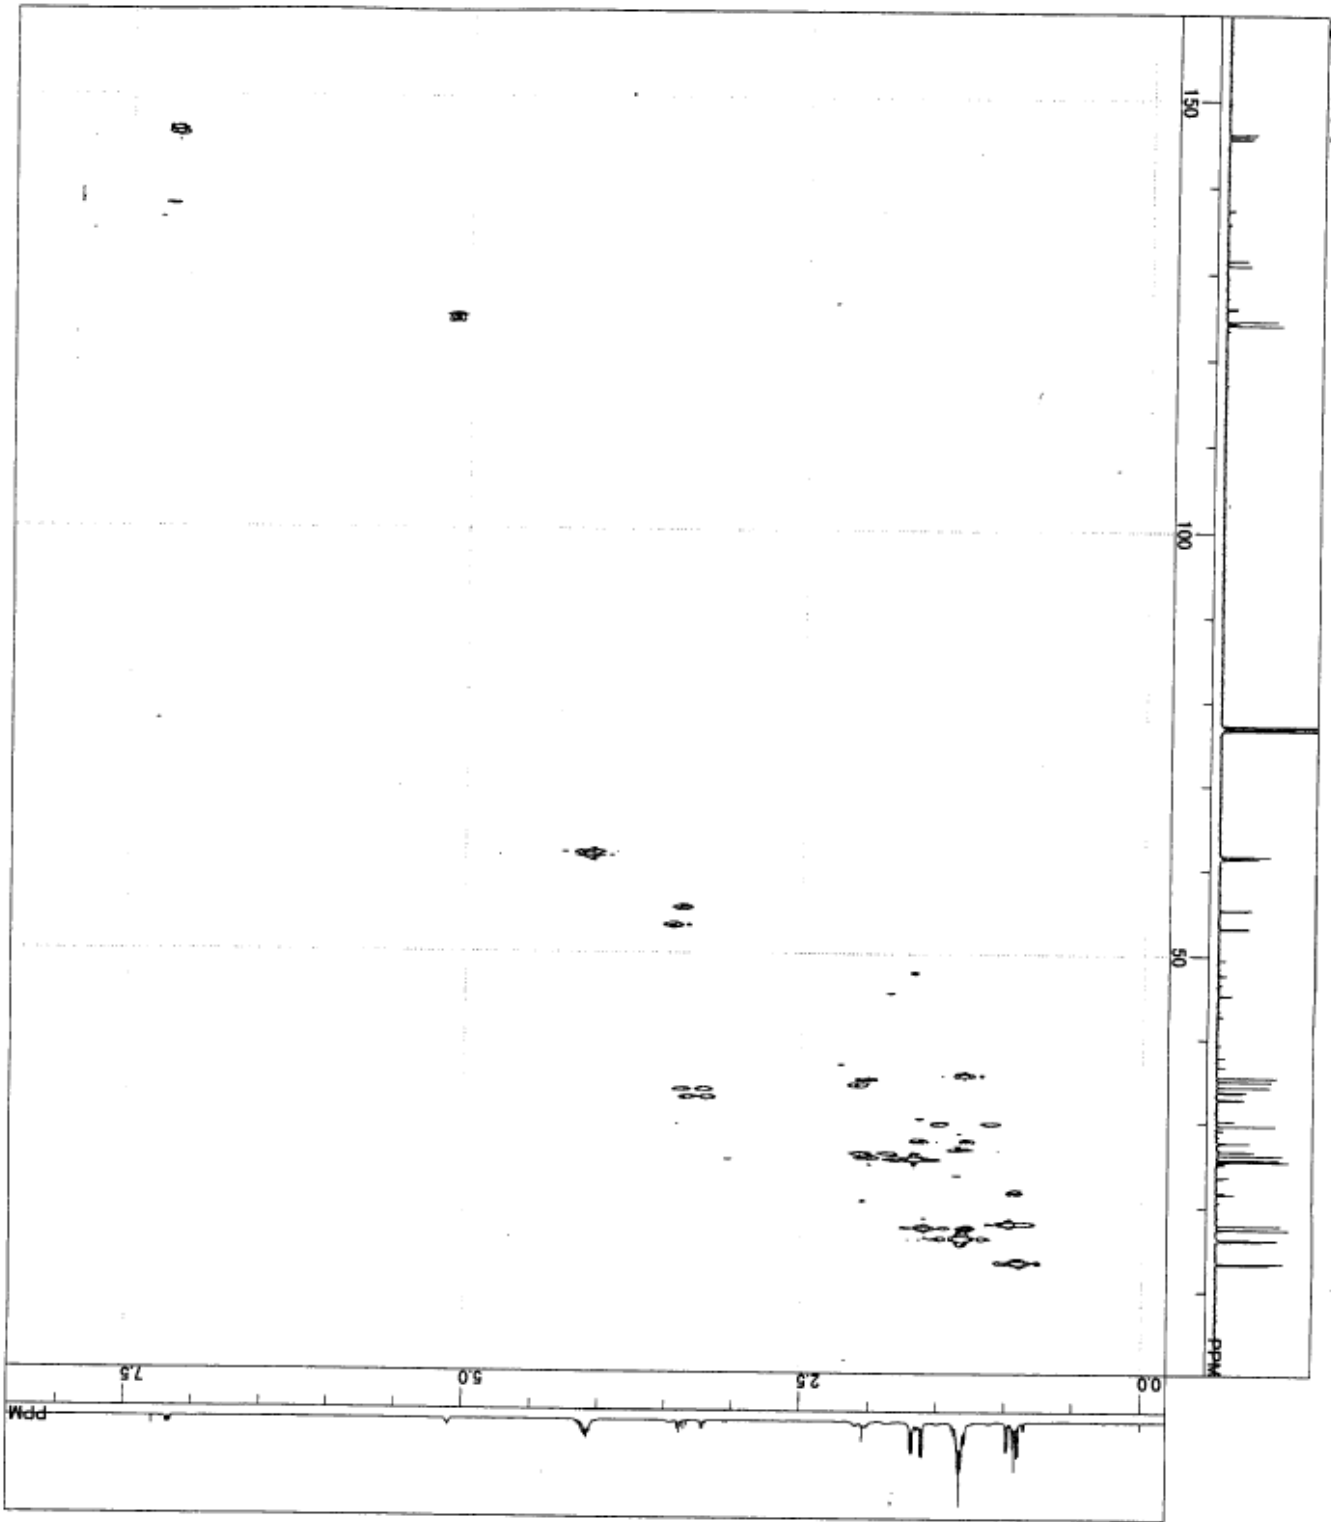

D:\FILE C:\NMR\data\0001  
 EXMOD CHSHF  
 IRMOD IRLV2  
 COANVT 3gerani-thio-s  
 OBNUC 13C  
 OBSSET 0.00 KHz  
 OBATN 511  
 FREQU 25125.63 Hz  
 POINT 1024  
 INTVL 39.8000 usec  
 CLFRQ 5316.32 Hz  
 CLPNT 256  
 CINTV 188.10 usec  
 TODAY 256  
 TIMES 32  
 SCANS 32  
 ACOTM 0.0408 sec  
 PD 1.2000 sec  
 PW1 9.00 usec  
 PW2 26.00 usec  
 PW3 14.60 usec  
 P11 80.0000 msec  
 P12 1.0000 msec  
 P13 20.0000 msec  
 IRNUC 1H  
 IRSET 0.00 KHz  
 IRATN 511  
 IRRPW 50 usec  
 TRNUC 1H  
 TRSET 0.00 KHz  
 TRATN 511  
 TRRPW 0 usec  
 CTEMP 26.2 c  
 CSPED 10 Hz  
 SLVNT CDCL3  
 LOOP1 1  
 XS 0.00 Hz  
 CXS 25125.63 Hz  
 XE  
 CXE  
 THTOP  
 THBTM  
 DEADT 5.00 usec  
 DELAY 15.58 usec  
 CINWT 10.00 usec

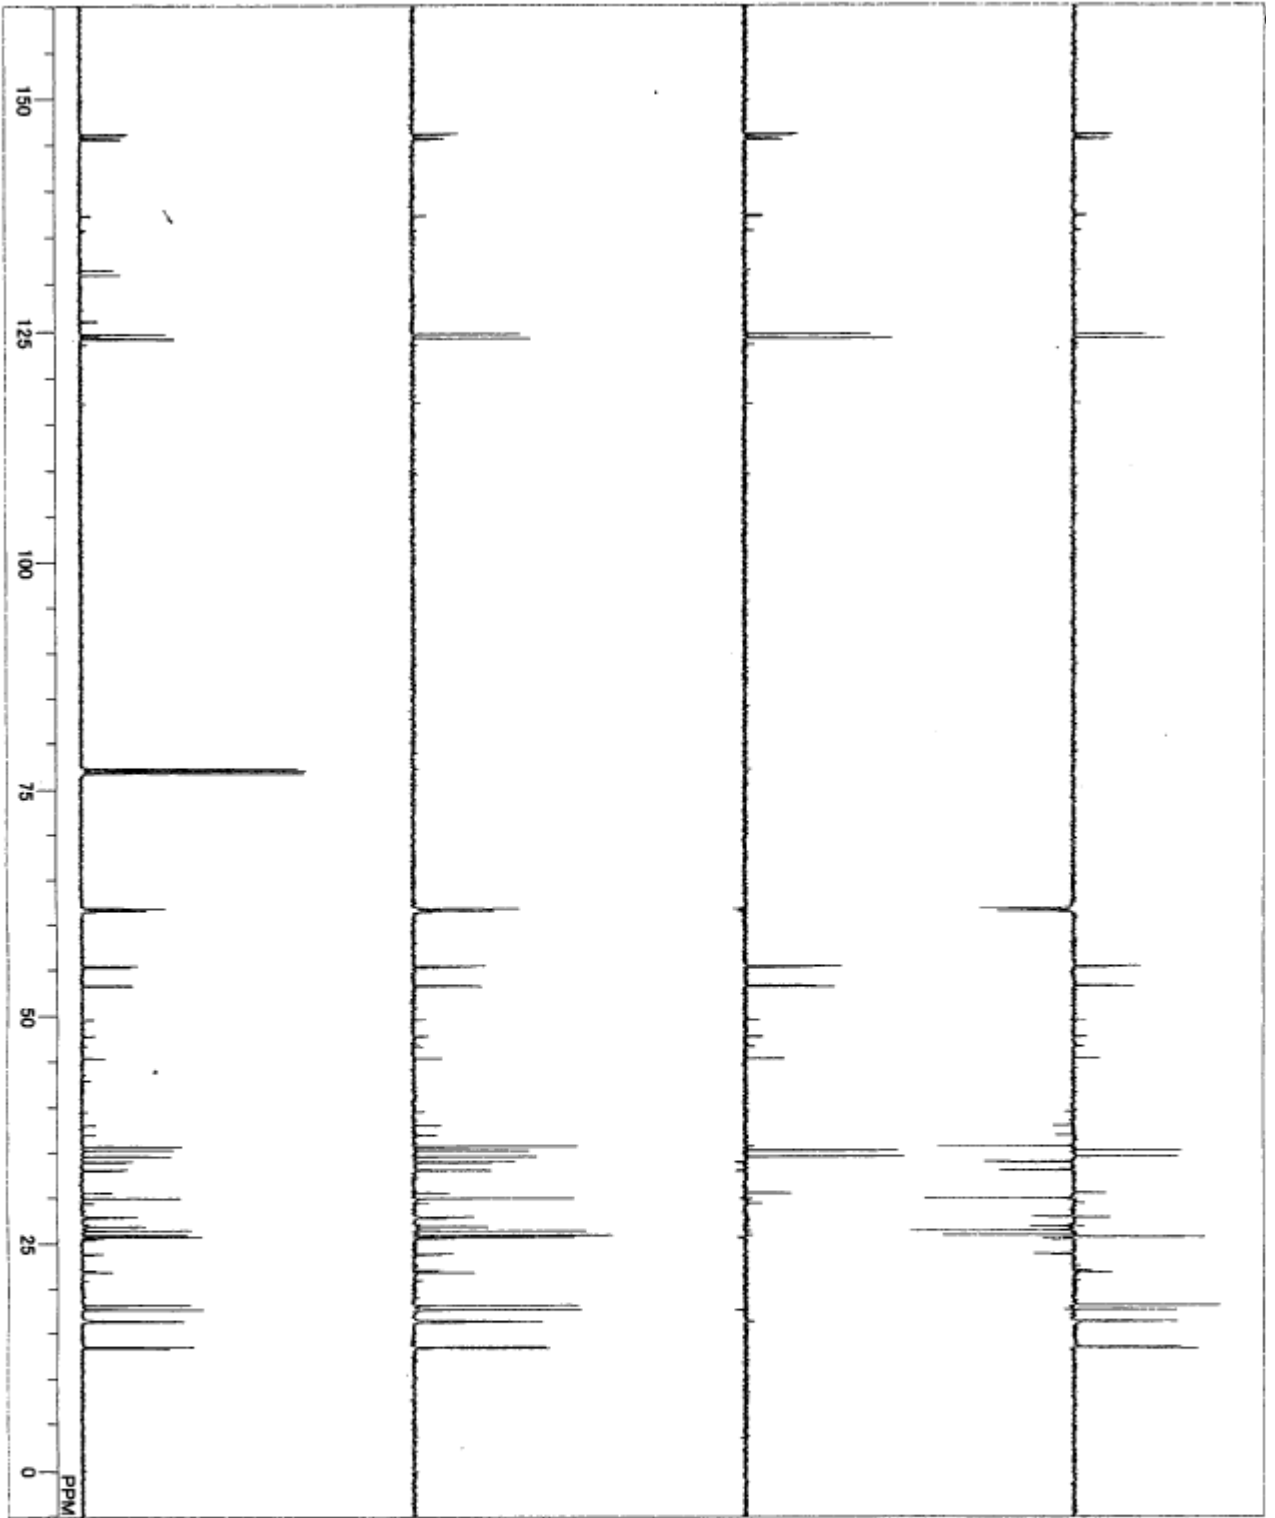

MENU  
 OBNUG 13C  
 OBFRO 125.65 MHz  
 OBFIN 127958.00 Hz  
 PWI 4.50 usec  
 DEADT 15.45 usec  
 PREDL 0.20000 msec  
 INIWT 10.00000 msec  
 POINT 32768  
 SAMPO 32768  
 TIMES 512  
 DUMMY 1  
 FREOU 33898.30 Hz  
 FILTR 16950 Hz  
 DELAY 11.80 usec  
 ACQTM 0.9667 sec  
 PD 2.0000 sec  
 ADBIT 16  
 RGAIN 29  
 BF 1.00 Hz  
 T1 0.00  
 T2 0.00  
 T3 90.00  
 T4 100.00  
 EXMOD SINGL  
 EXPCM Single pulse  
 IRNUC 1H  
 IREFRQ 500.00 MHz  
 IREFN 162410.00 Hz  
 IRRPW 50 usec  
 IRATN 511  
 DFILE  
 SHMFL  
 CTEMP 24.2 c  
 LKFIN 134.0 Hz  
 LKLEV 200  
 LGAIN 22  
 LKPHS 193  
 LKSIG 521  
 CSPED 13 Hz  
 FILDC  
 FLDF

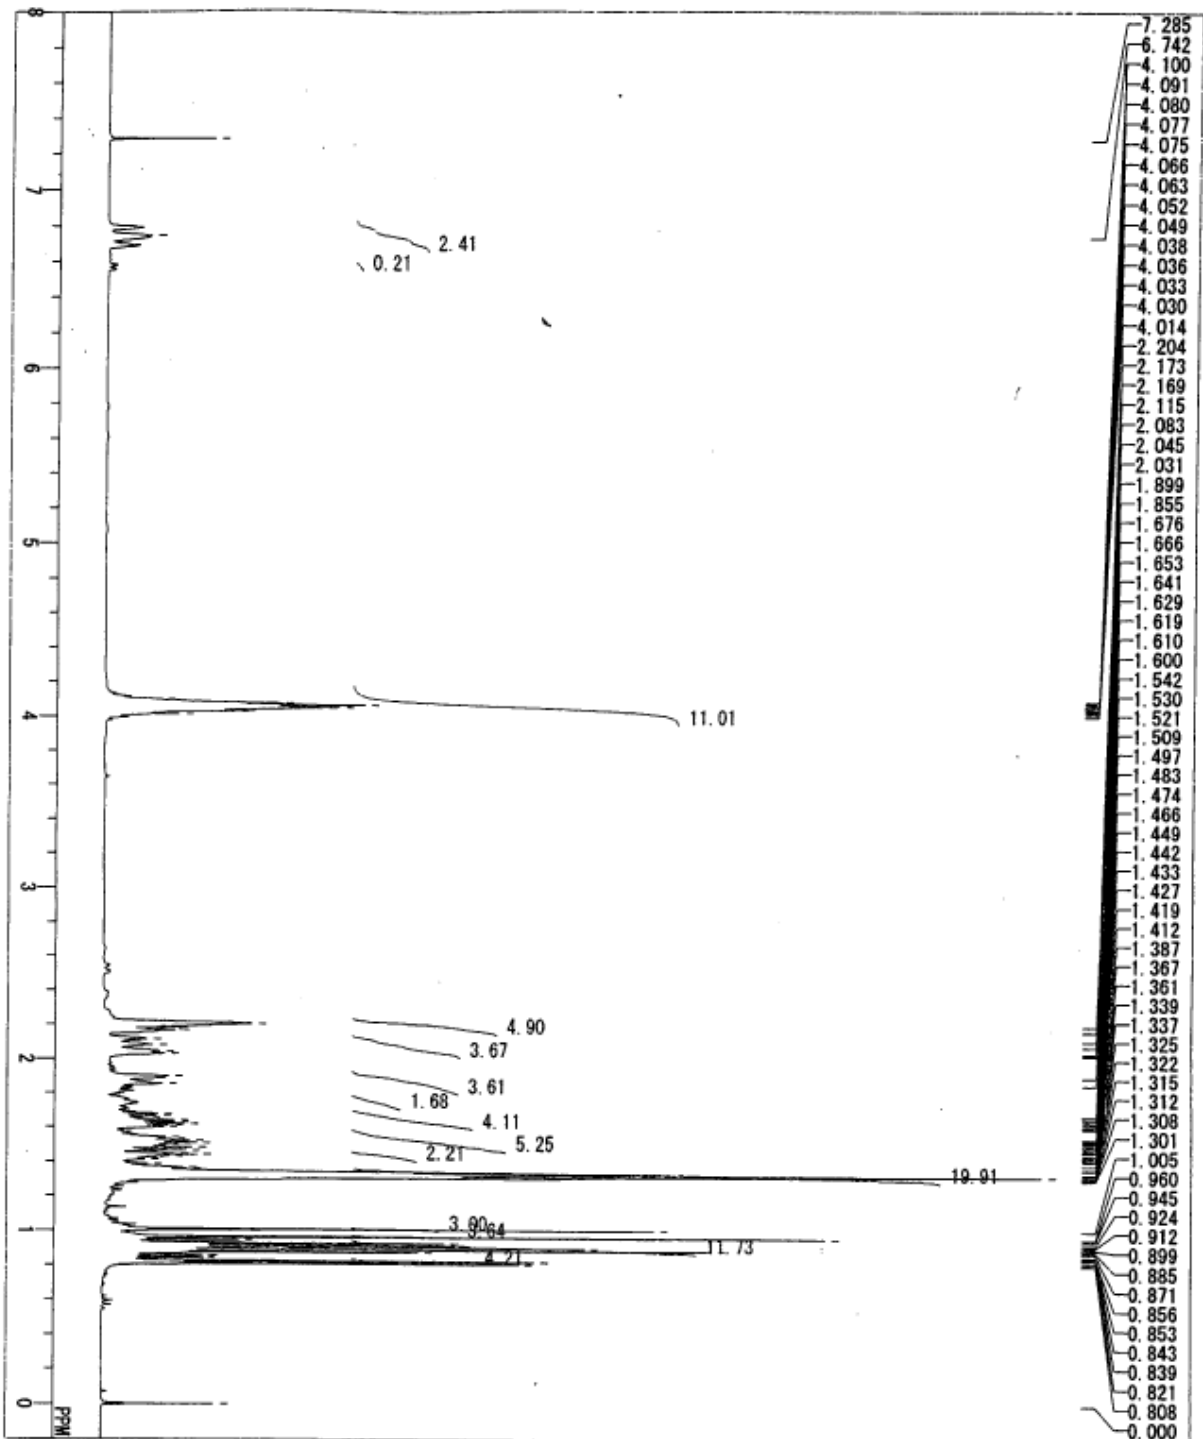

MENUF 1H  
 ORNUC 1H  
 OFR 500.00 MHz  
 OBSSET 0.00 KHz  
 162410.00 Hz  
 PWT 7.00 usec  
 DEADT 56.50 usec  
 PREDL 0.20000 msec  
 IWT 10.0000 msec  
 POINT 32768  
 SPO 32768  
 TIMES 32  
 DUMINY 1  
 FREQU 10000.00 Hz  
 FLT  
 DELAY 40.00 usec  
 ACQTM 3.2768 sec  
 PD 2.0000 sec  
 ADBIT 16  
 RGAIN 12  
 BF 0.15 Hz  
 T1 0.00  
 T2 0.00  
 T3 90.00  
 T4 100.00  
 EXMOD SINGL  
 EXPCM Single pulse  
 IRNUC 1H  
 IFR 500.00 MHz  
 IRSET 0.00 KHz  
 IRFIN 162410.00 Hz  
 IRRPW 50 usec  
 IRATN 511  
 DPFILE C:\NMR\data\Kookuni\suek\Sta716\NON\_E1.ft.  
 THSAT40MNO3ta716  
 SF 23.30  
 CTMP 70.20 KHz  
 LKSET 134.0 Hz  
 LKFIN 200  
 LKLEV 23  
 LGAIN 10240  
 LKPHS 676  
 LKSTG 14 Hz  
 CSPED  
 FILDC  
 FILDF

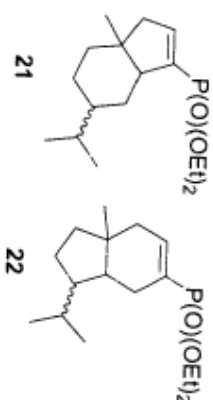

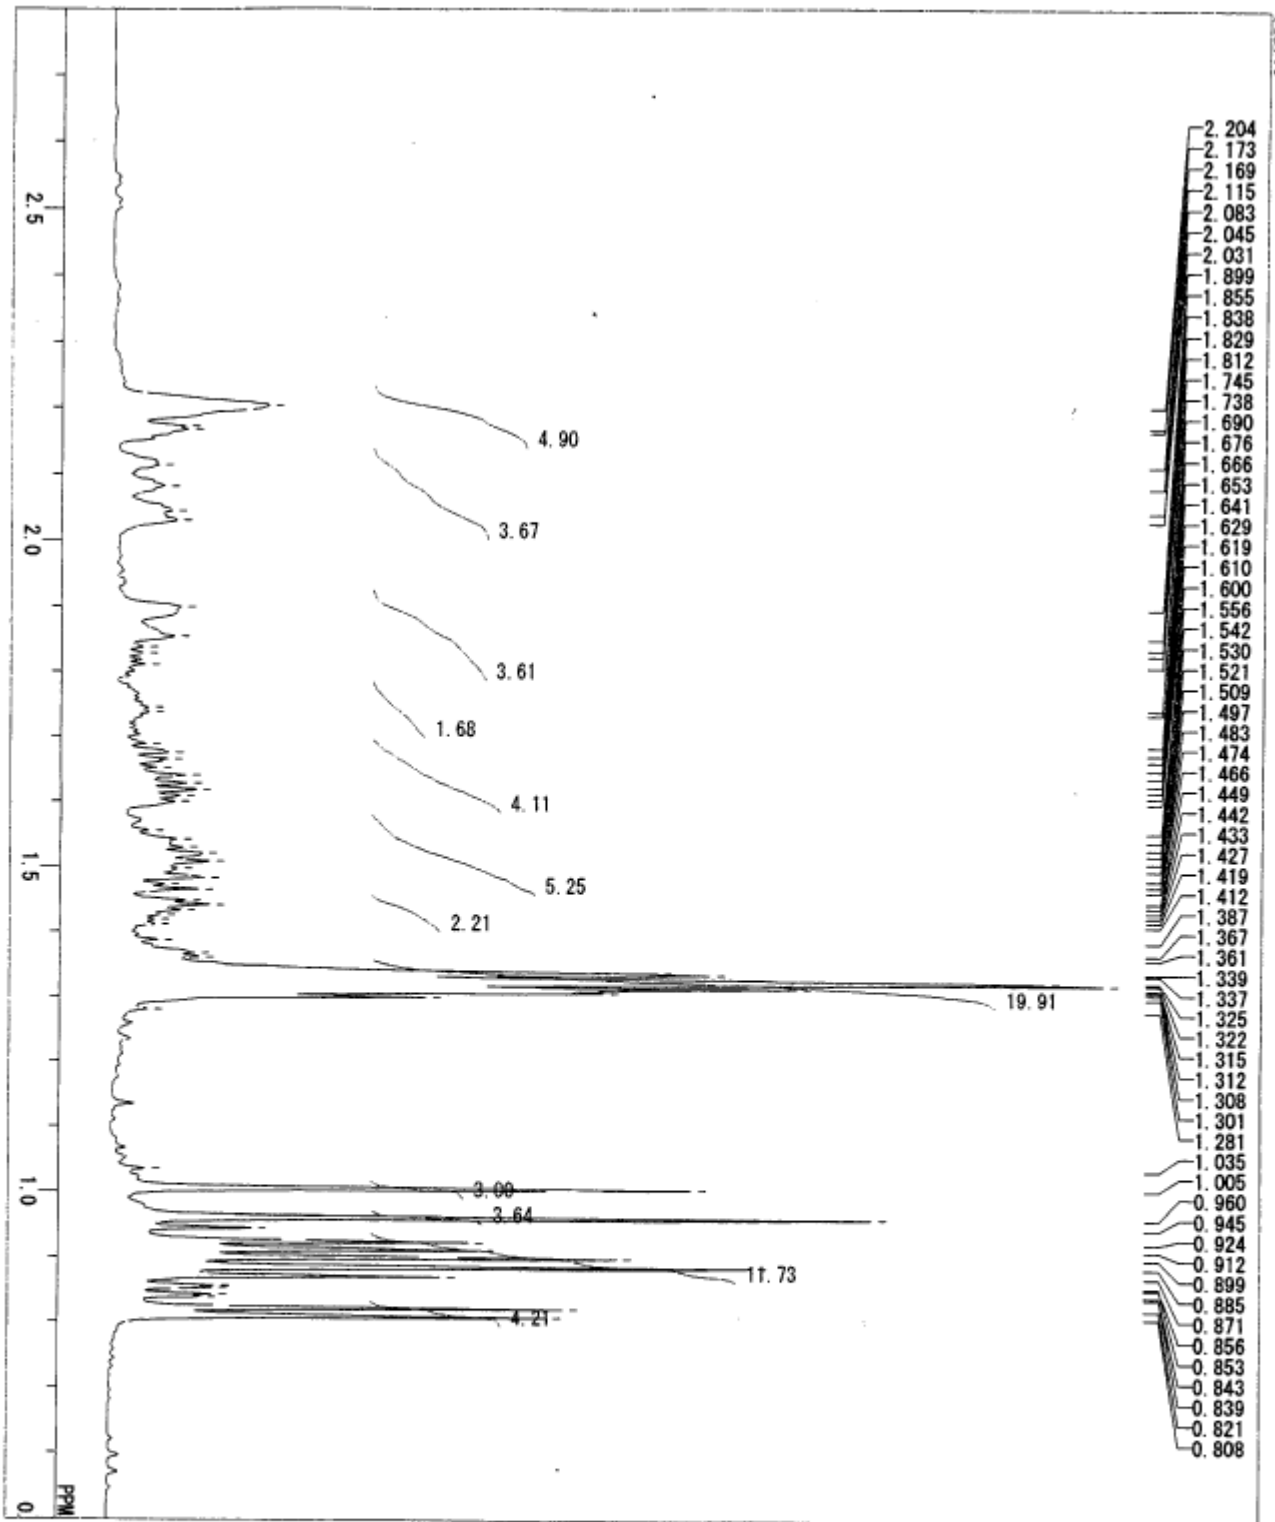

MENUF NON  
 OBRUC 1H  
 OFR 500.00 MHz  
 OBSSET 0.00 KHz  
 OFE IN 162410.00 Hz  
 PW1 7.00 usec  
 DEADT 56.50 usec  
 PREDL 0.20000 msec  
 IWT 10.0000 msec  
 POINT 32768  
 SPD 32768  
 TIMES 32  
 DUMY 1  
 FREQU 10000.00 Hz  
 FLT  
 DELAY 40.00 usec  
 ACQTM 3.2768 sec  
 PD 2.0000 sec  
 ADBIT 16  
 RGAIN 12  
 BF 0.15 Hz  
 T1 0.00  
 T2 0.00  
 T3 90.00  
 T4 100.00

EXMOD SINGL  
 EXPCM Single pulse  
 IRNUC 1H  
 IFR 500.00 MHz  
 IRSET 0.00 KHz  
 RFIN 162410.00 Hz  
 IRRPW 50 usec  
 IRATN 511  
 DEFILE  
 SF THSATA0MMNO3ta716  
 C:\NMR\data\kookun\i

CTEMP 23.3 C  
 LKSET 70.20 KHz  
 LKFIN 134.0 Hz  
 LKLEV 200  
 LGAIN 23  
 LKPHS 10240  
 LKSIG 676  
 CSPED 14 Hz  
 FLDC  
 FLDF

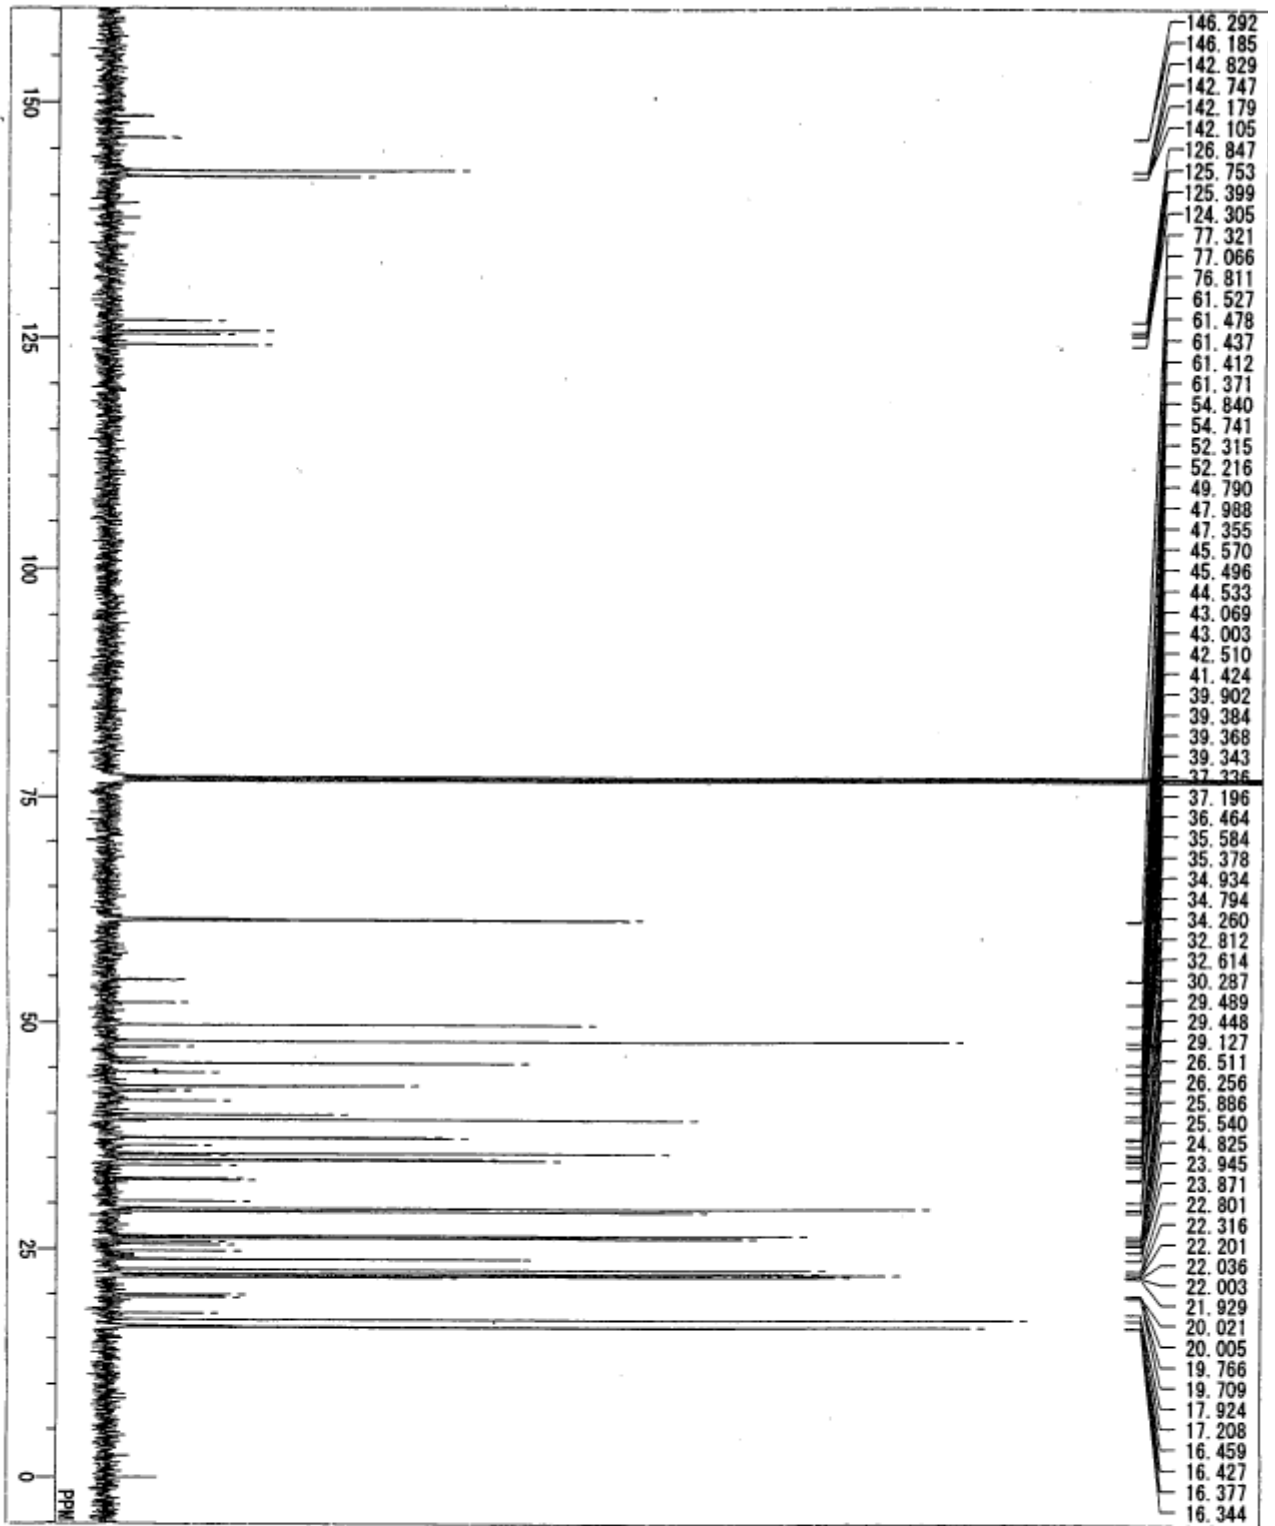

```

MENUF      BCM
ORNUC      13C
OFFR
ORSET      125.65 MHz
PMT1       0.00 KHz
DEADT      4.50 usec
PREDL      15.45 usec
INT        0.20000 msec
POINT      10.0000 msec
SFO        32768
DUMY       32768
TIMES      800
FREQU      4
FLI        33898.30 Hz
DELAY      11.90 usec
ACQTM      0.9667 sec
PD         2.0000 sec
ADBIT      16
RGAIN      30
BF         1.00 Hz
T1         0.00
T2         0.00
T3         90.00
T4         100.00
EXMOD      SINGL
EXPCM      Single pulse
IRNUC      1H
IRF        500.00 MHz
IRSET      0.00 KHz
IRFIN      162410.00 Hz
IRRPW      50 usec
IRATN      511
DFILE      C:\NMR\data\work\unit1
SF         THSAT40MMNO3a716
CTEMP      23.6 C
LKSET      70.20 KHz
LKF IN     134.0 Hz
LKLEV      200
LGA IN     23
LKPHS      10240
LKSIG      677
CSPED      14 Hz
FLDC
FLDF
  
```



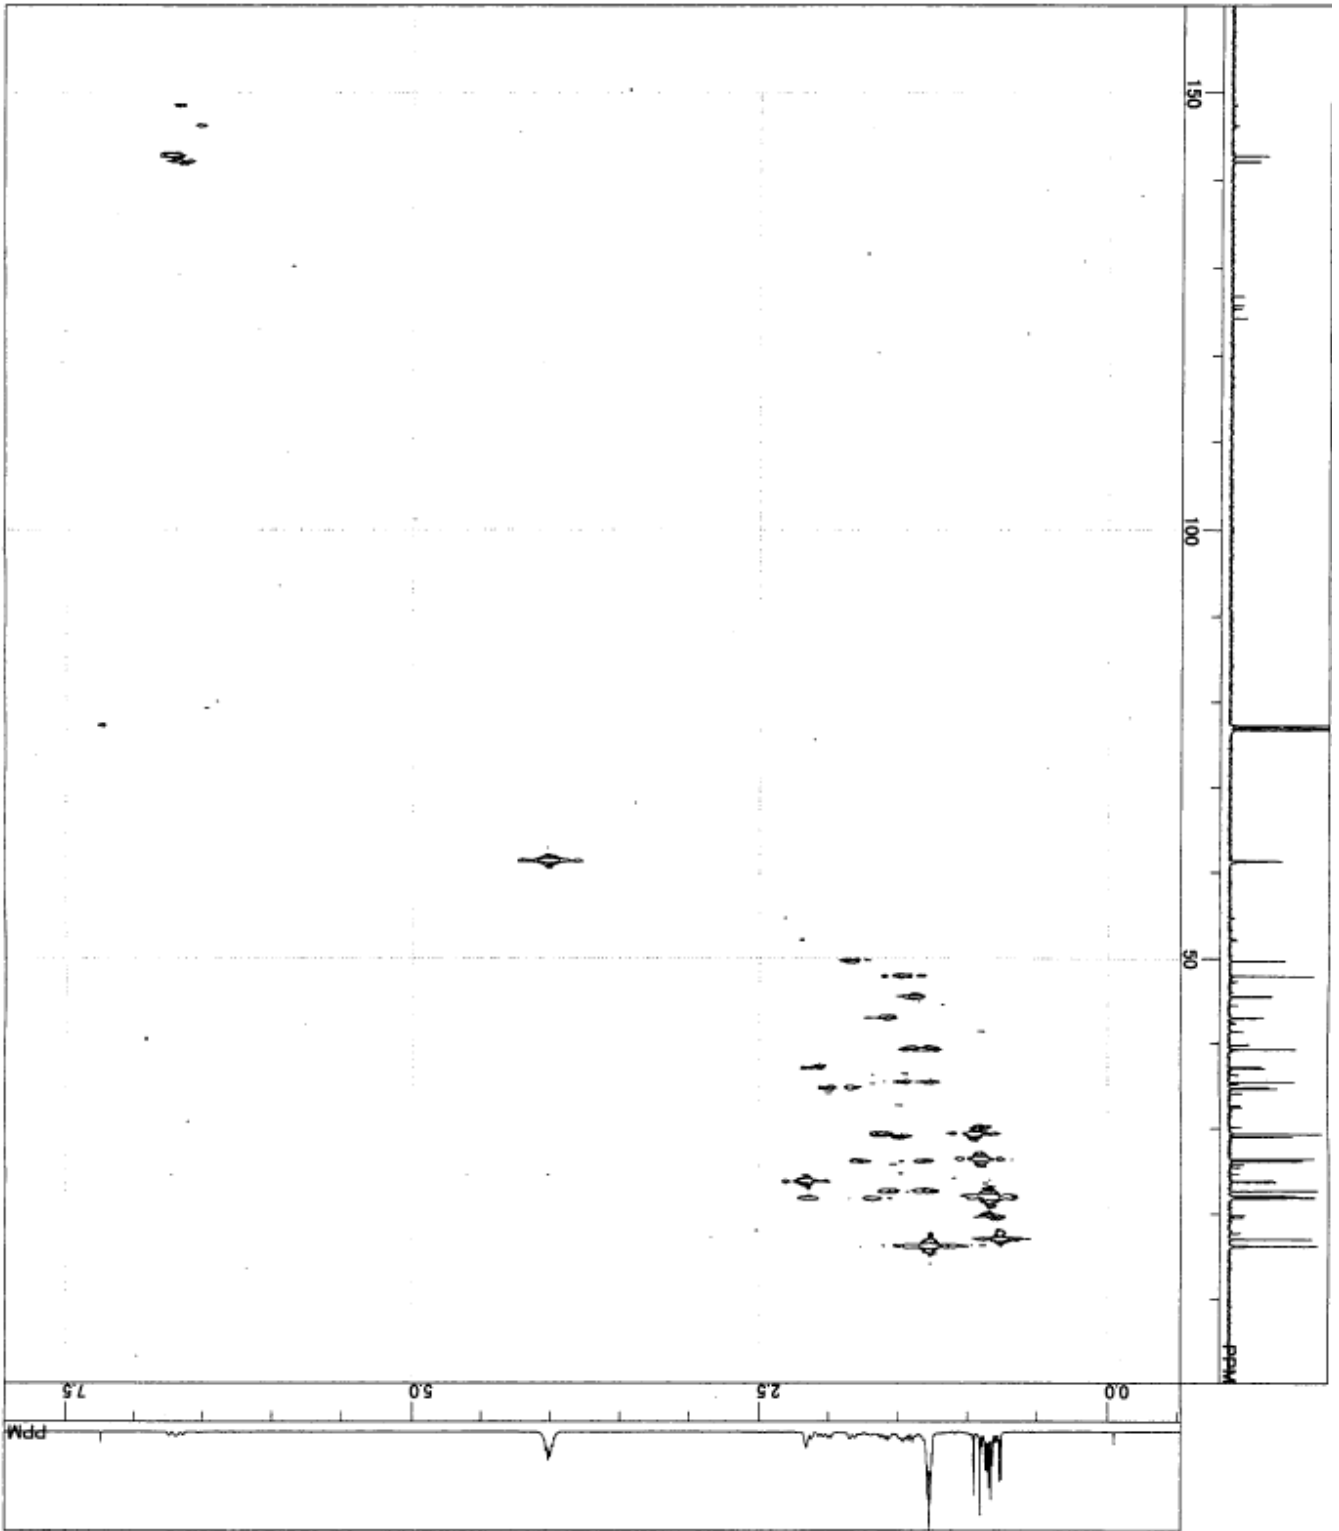

D:\FILE CHSHIF  
 EXMOD IRLVZ  
 IRMOD 3h718  
 COMMENT  
 OBNUC 13C  
 OBSE 0.00 KHz  
 OBATN 511  
 FREQ 25125.63 Hz  
 POINT 1024  
 INTVL 39.8000 usec  
 CLFRG 5339.03 Hz  
 CLPNT 256  
 QINTV 187.30 usec  
 TODAY 256  
 TIMES 64  
 SCANS 64  
 ACQTM 0.0408 sec  
 PD 1.2000 sec  
 PW1 9.00 usec  
 PW2 26.00 usec  
 PW3 14.60 usec  
 P11 80.0000 msec  
 P12 1.0000 msec  
 P13 20.0000 msec  
 IRNUC 1H  
 IRSET 0.00 KHz  
 IRATN 511  
 IRPPW 50 usec  
 TRNUC 1H  
 TRSET 0.00 KHz  
 TRATN 511  
 TRRPW 0 usec  
 CTEMP 25.1 g  
 CSPED 13 Hz  
 SLVNT CDCL3  
 LOOP1 1  
 XS 0.00 Hz  
 CXS 25125.63 Hz  
 XE  
 CXE  
 THTOP 5.00 usec  
 THBTM 15.58 usec  
 DEADT 10.00 usec  
 DELAY  
 CINWT

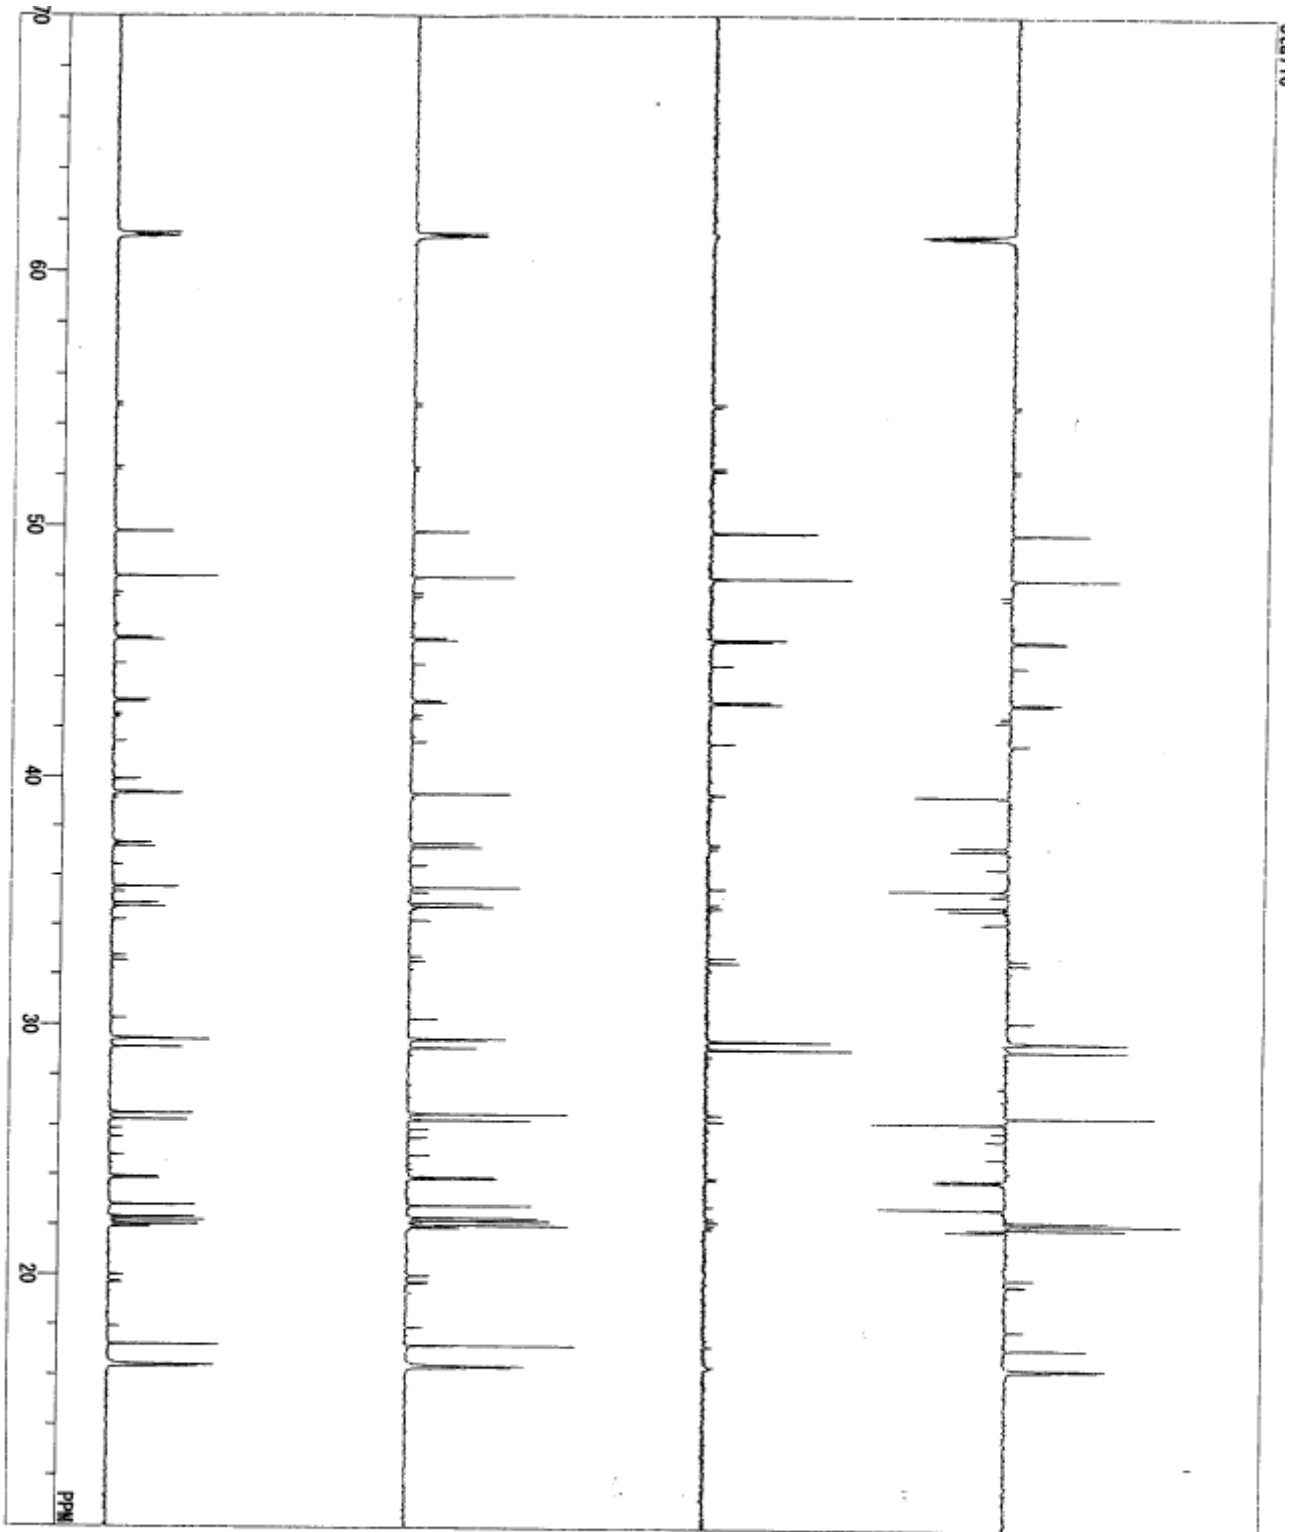

MENUF BOM  
 ORNUC 13C  
 OFR 125.65 MHz  
 ORSET 0.00 KHz  
 127958.00 Hz  
 PWT 4.50 usec  
 DEADT 15.45 usec  
 PREDL 0.20000 msec  
 INT 10.0000 msec  
 POINT 32768  
 SPO 32768  
 TIMES 800  
 DUMMY 4  
 FREQU 33898.30 Hz  
 FLT  
 DELAY 11.80 usec  
 ACQTM 0.9667 sec  
 PD 2.0000 sec  
 ADBIT 16  
 RGAIN 30  
 BF 1.00 Hz  
 T1 0.00  
 T2 0.00  
 T3 90.00  
 T4 100.00  
 EXMOD SINGL  
 EXPCM Single pulse  
 IRNUC 1H  
 IFR 500.00 MHz  
 IRSET 0.00 KHz  
 IRFIN 162410.00 Hz  
 IRRPW 50 usec  
 IRATN 511  
 DF FILE C:\NMR\data\K00\kuni1  
 SF THSA140MM03ta716  
 CTEMP 23.6 e  
 LKSET 70.20 KHz  
 LKFIN 134.0 Hz  
 LKLEV 200  
 LGAIN 23  
 LKPHS 10240  
 LKSIG 677  
 CSPED 14 Hz  
 FILDC  
 FILDF

## Supporting Information for Theoretical Calculations

\*Energies were given in hartrees.

---Cyclization and rearrangement reactions of 7'e ----

**Reactant 7'e** (NIMAG=0), grand minimum

Sum of electronic and zero-point Energies (hartrees)= -269.710238

Cartesian Coordinates (Angstroms)

|   | X         | Y         | Z         |
|---|-----------|-----------|-----------|
| C | -1.361734 | 1.449502  | 0.126437  |
| C | -1.736153 | 0.229872  | -0.198170 |
| O | -1.038186 | -0.952360 | -0.106050 |
| C | 0.265722  | -0.892432 | 0.479397  |
| C | 1.296639  | -0.262342 | -0.417733 |
| C | 2.244608  | 0.576164  | 0.000509  |
| H | -2.728414 | 0.025140  | -0.596867 |
| H | -0.524390 | 2.020760  | 0.489531  |
| H | 1.257199  | -0.575446 | -1.460724 |
| H | 2.303672  | 0.902320  | 1.037537  |
| H | 3.004204  | 0.963578  | -0.672625 |
| H | 0.221200  | -0.377938 | 1.449719  |
| H | 0.517529  | -1.944116 | 0.659191  |

Other minima (not appeared in the text)

Sum of electronic and zero-point Energies (hartrees)= -269.707960

Cartesian Coordinates (Angstroms)

|   | X         | Y         | Z         |
|---|-----------|-----------|-----------|
| C | 2.677133  | -0.686625 | -0.022582 |
| C | 1.389863  | -0.450391 | 0.113848  |
| O | 0.809428  | 0.770330  | -0.154194 |
| C | -0.541418 | 0.918921  | 0.311142  |
| C | -1.517199 | 0.068755  | -0.452593 |
| C | -2.401380 | -0.752079 | 0.115565  |
| H | 0.699811  | -1.231909 | 0.435676  |
| H | 3.582932  | -0.185540 | -0.327803 |
| H | -1.473769 | 0.167661  | -1.536987 |
| H | -2.458993 | -0.869837 | 1.196134  |
| H | -3.109320 | -1.329199 | -0.472943 |
| H | -0.603152 | 0.712186  | 1.388907  |
| H | -0.754928 | 1.982511  | 0.158287  |

Sum of electronic and zero-point Energies (hartrees)= -269.709306

Cartesian Coordinates (Angstroms)

|   | X         | Y         | Z         |
|---|-----------|-----------|-----------|
| C | 1.676835  | -0.989945 | 0.666715  |
| C | 1.579179  | -0.174290 | -0.361690 |
| O | 0.624081  | 0.781422  | -0.627611 |
| C | -0.343212 | 1.033087  | 0.387895  |
| C | -1.504868 | 0.073961  | 0.406175  |
| C | -1.746871 | -0.869880 | -0.500965 |
| H | 2.315843  | -0.173140 | -1.163039 |
| H | 1.170823  | -1.295258 | 1.567738  |
| H | -2.191478 | 0.221072  | 1.241109  |
| H | -1.079895 | -1.032343 | -1.342179 |
| H | -2.618406 | -1.513795 | -0.427937 |
| H | 0.151060  | 1.055814  | 1.370929  |
| H | -0.706979 | 2.048677  | 0.185488  |

Sum of electronic and zero-point Energies (hartrees)= -269.707452

Cartesian Coordinates (Angstroms)

|   | X         | Y         | Z         |
|---|-----------|-----------|-----------|
| C | -2.490180 | 0.628700  | 0.104218  |
| C | -1.393948 | -0.034373 | 0.403803  |
| O | -0.543828 | -0.573414 | -0.536763 |
| C | 0.683672  | -1.090648 | -0.032581 |
| C | 1.749706  | -0.051058 | 0.188982  |
| C | 1.638811  | 1.242271  | -0.108669 |
| H | -1.104500 | -0.212556 | 1.441722  |
| H | -3.054676 | 0.958005  | -0.754239 |
| H | 2.673396  | -0.438631 | 0.621250  |
| H | 0.731369  | 1.649567  | -0.543352 |
| H | 2.454947  | 1.934939  | 0.075133  |
| H | 0.503068  | -1.652243 | 0.898845  |
| H | 1.018652  | -1.821128 | -0.779769 |

Sum of electronic and zero-point Energies (hartrees)= -269.707447

Cartesian Coordinates (Angstroms)

|   | X         | Y         | Z         |
|---|-----------|-----------|-----------|
| C | -2.488739 | 0.629929  | 0.104264  |
| C | -1.394370 | -0.036263 | 0.403725  |
| O | -0.543723 | -0.574230 | -0.536981 |
| C | 0.684159  | -1.090656 | -0.032911 |
| C | 1.749435  | -0.050364 | 0.188970  |
| C | 1.637523  | 1.243013  | -0.108077 |
| H | -1.107329 | -0.218673 | 1.441596  |
| H | -3.050879 | 0.963274  | -0.754182 |
| H | 2.673471  | -0.437446 | 0.620942  |
| H | 0.729703  | 1.649819  | -0.542417 |
| H | 2.453159  | 1.936214  | 0.075939  |
| H | 0.503911  | -1.652583 | 0.898398  |
| H | 1.019702  | -1.820723 | -0.780252 |

Sum of electronic and zero-point Energies (hartrees)= -269.709146

Cartesian Coordinates (Angstroms)

|   | X         | Y         | Z         |
|---|-----------|-----------|-----------|
| C | -2.031150 | 1.047046  | 0.183942  |
| C | -1.815565 | -0.136743 | -0.353915 |
| O | -0.730479 | -0.967506 | -0.236837 |
| C | 0.344938  | -0.519596 | 0.603974  |
| C | 1.267805  | 0.432615  | -0.103146 |
| C | 2.582462  | 0.242782  | -0.211451 |
| H | -2.557191 | -0.607440 | -0.997451 |
| H | -1.590859 | 1.802260  | 0.814037  |
| H | 0.806092  | 1.319870  | -0.533361 |
| H | 3.069485  | -0.638433 | 0.201929  |
| H | 3.225865  | 0.961253  | -0.711981 |
| H | -0.080939 | -0.066063 | 1.511375  |
| H | 0.880440  | -1.428025 | 0.893725  |



Sum of electronic and zero-point Energies (hartrees)= -269.706842

Cartesian Coordinates (Angstroms)

|   | X         | Y         | Z         |
|---|-----------|-----------|-----------|
| C | 2.694825  | -0.688651 | -0.096389 |
| C | 1.678731  | 0.030728  | 0.330830  |
| O | 0.700383  | 0.539909  | -0.490706 |
| C | -0.550853 | 0.831030  | 0.150110  |
| C | -1.419537 | -0.386672 | 0.288469  |
| C | -2.658069 | -0.477873 | -0.194585 |
| H | 1.575306  | 0.296402  | 1.386905  |
| H | 3.099430  | -1.080164 | -1.017145 |
| H | -0.978844 | -1.225167 | 0.827958  |
| H | -3.118788 | 0.341000  | -0.743887 |
| H | -3.262821 | -1.370191 | -0.058217 |
| H | -0.351985 | 1.282493  | 1.135777  |
| H | -1.035949 | 1.584984  | -0.476359 |

**Transition structure 7'e/8'e (5-exo) (NIMAG=1)**

Sum of electronic and zero-point Energies (hartrees)= -269.708766

Cartesian Coordinates (Angstroms)

|   | X         | Y         | Z         |
|---|-----------|-----------|-----------|
| O | 1.246392  | -0.880693 | 0.086702  |
| C | 1.594421  | 0.439520  | -0.021910 |
| C | 0.719164  | 1.419385  | -0.118062 |
| C | -1.052734 | -0.076362 | 0.441444  |
| C | -2.204083 | 0.328766  | -0.142956 |
| C | -0.143441 | -1.101832 | -0.185210 |
| H | 2.678864  | 0.556497  | 0.010325  |
| H | 0.764856  | 2.494705  | -0.192953 |
| H | -0.892605 | 0.120911  | 1.499915  |
| H | -2.429186 | 0.090288  | -1.179929 |
| H | -2.923655 | 0.947186  | 0.384817  |
| H | -0.303052 | -1.120738 | -1.272956 |
| H | -0.346324 | -2.100175 | 0.217329  |

Other Transition structure (5-*exo*) (NIMAG=1)---higher energy

(not appeared in the text)

Sum of electronic and zero-point Energies (hartrees)= -269.705916

Cartesian Coordinates (Angstroms)

|   | X         | Y         | Z         |
|---|-----------|-----------|-----------|
| O | -0.948900 | -0.913688 | -0.415958 |
| C | -1.489790 | 0.335930  | -0.287055 |
| C | -0.899448 | 1.320340  | 0.360514  |
| C | 1.140129  | 0.061538  | 0.483836  |
| H | 1.353961  | 0.490604  | 1.459894  |
| C | 0.175840  | -1.106521 | 0.458973  |
| H | -2.458277 | 0.394523  | -0.785495 |
| H | -1.098785 | 2.368064  | 0.525327  |
| C | 1.898792  | 0.418727  | -0.578118 |
| H | 2.631553  | 1.217452  | -0.510600 |
| H | 1.756315  | -0.036594 | -1.555297 |
| H | -0.204832 | -1.287654 | 1.472479  |
| H | 0.658123  | -2.016979 | 0.092453  |

**Transition structure 7'e/10'e (6-endo) (NIMAG=1)**

Sum of electronic and zero-point Energies (hartrees)= -269.701246

Cartesian Coordinates (Angstroms)

|   | X         | Y         | Z         |
|---|-----------|-----------|-----------|
| O | 1.084704  | -0.910791 | -0.117773 |
| C | 1.426295  | 0.415690  | -0.110867 |
| C | 0.657385  | 1.473579  | 0.098348  |
| C | -1.620501 | 0.771526  | 0.106804  |
| C | -0.240948 | -1.246636 | 0.344858  |
| C | -1.270743 | -0.440664 | -0.384853 |
| H | 2.495221  | 0.504320  | -0.324193 |
| H | 0.914869  | 2.524895  | 0.088190  |
| H | -1.511159 | 1.004392  | 1.161916  |
| H | -2.201021 | 1.479538  | -0.479318 |
| H | -1.466710 | -0.694871 | -1.424259 |
| H | -0.323282 | -2.322174 | 0.169369  |
| H | -0.294479 | -1.050739 | 1.424745  |

**Product 8'e (NIMAG=0)**

Sum of electronic and zero-point Energies (hartrees)= -269.758279

Cartesian Coordinates (Angstroms)

|   | X         | Y         | Z         |
|---|-----------|-----------|-----------|
| O | 0.000000  | 0.000000  | 0.000000  |
| C | 0.000000  | 0.000000  | 1.367567  |
| C | 1.203107  | 0.000000  | 1.943143  |
| C | 2.274353  | 0.038440  | 0.851598  |
| C | 3.365656  | -0.968507 | 1.000144  |
| C | 1.375681  | -0.210088 | -0.402071 |
| H | -0.987936 | 0.018579  | 1.813274  |
| H | 1.408458  | 0.020996  | 3.004761  |
| H | 2.720642  | 1.043222  | 0.808579  |
| H | 3.124648  | -2.028002 | 1.007479  |
| H | 4.387404  | -0.675292 | 1.216051  |
| H | 1.469152  | -1.247715 | -0.746674 |
| H | 1.590593  | 0.463005  | -1.235183 |

**Product 9'e (NIMAG=0)**

Sum of electronic and zero-point Energies (hartrees)= -269.756584

Cartesian Coordinates (Angstroms)

|   | X         | Y         | Z         |
|---|-----------|-----------|-----------|
| O | 0.000000  | 0.000000  | 0.000000  |
| C | 0.000000  | 0.000000  | 1.379499  |
| C | 1.384359  | 0.000000  | 1.888939  |
| C | 2.240365  | 0.336592  | 0.680388  |
| C | 2.335369  | -1.036084 | 1.284529  |
| C | 1.262525  | 0.519852  | -0.466360 |
| H | -0.837968 | -0.545815 | 1.802950  |
| H | 1.599804  | 0.396589  | 2.876959  |
| H | 3.081202  | 1.019777  | 0.754485  |
| H | 1.898593  | -1.876430 | 0.749182  |
| H | 3.236224  | -1.272087 | 1.845399  |
| H | 1.517893  | -0.033676 | -1.376261 |
| H | 1.149672  | 1.583205  | -0.718921 |

**Product 10'e (NIMAG=0)**

Sum of electronic and zero-point Energies (hartrees)= -269.768233

Cartesian Coordinates (Angstroms)

|   | X         | Y         | Z         |
|---|-----------|-----------|-----------|
| O | 1.383416  | 0.369345  | -0.166538 |
| C | 0.405368  | 1.312774  | -0.051510 |
| C | -0.904509 | 1.076105  | 0.082515  |
| C | -1.477134 | -0.318694 | 0.024791  |
| C | 0.990344  | -0.963812 | 0.224090  |
| C | -0.390644 | -1.318387 | -0.205282 |
| H | 0.829206  | 2.312448  | -0.090686 |
| H | -1.578121 | 1.921719  | 0.180957  |
| H | -2.037796 | -0.547831 | 0.953415  |
| H | -2.230382 | -0.387925 | -0.776083 |
| H | -0.620474 | -2.336497 | -0.503163 |
| H | 1.742345  | -1.631543 | -0.205169 |
| H | 1.087344  | -1.013043 | 1.325410  |

**Transition structure 8'e/9'e (NIMAG=1)**

Sum of electronic and zero-point Energies (hartrees)= -269.741046

Cartesian Coordinates (Angstroms)

|   | X         | Y         | Z         |
|---|-----------|-----------|-----------|
| O | -1.410082 | -0.126317 | 0.387631  |
| C | -0.860645 | 1.078827  | 0.017503  |
| C | 0.420630  | 0.953770  | -0.490402 |
| C | 0.772310  | -0.507405 | -0.489081 |
| C | 1.594552  | -0.073977 | 0.664157  |
| C | -0.571763 | -1.168699 | -0.169126 |
| H | -1.414008 | 1.951110  | 0.337606  |
| H | 0.998985  | 1.731072  | -0.968292 |
| H | 1.293097  | -0.929402 | -1.350290 |
| H | 1.195133  | -0.116296 | 1.670068  |
| H | 2.633011  | 0.201994  | 0.525376  |
| H | -0.508961 | -1.973317 | 0.568912  |
| H | -1.047108 | -1.549733 | -1.082731 |



**Transition structure 9'e/10'e (NIMAG=1)**

Sum of electronic and zero-point Energies (hartrees)= -269.739409

Cartesian Coordinates (Angstroms)

|   | X         | Y         | Z         |
|---|-----------|-----------|-----------|
| O | -1.363223 | 0.204506  | 0.364898  |
| C | -0.580141 | 1.222112  | -0.088466 |
| C | 0.775141  | 0.947191  | -0.246049 |
| C | 0.614963  | -0.949627 | -0.431721 |
| C | 1.416800  | -0.159673 | 0.536983  |
| C | -0.826790 | -1.098691 | -0.095479 |
| H | -1.103093 | 2.064435  | -0.531718 |
| H | 1.385472  | 1.559912  | -0.904360 |
| H | 1.041781  | -1.359772 | -1.337443 |
| H | 1.119344  | -0.240328 | 1.587311  |
| H | 2.499008  | -0.219187 | 0.422183  |
| H | -1.014665 | -1.776493 | 0.747463  |
| H | -1.421895 | -1.432478 | -0.954230 |

---Cyclization and rearrangement reactions of 7'f ----

Reactant 7'f (NIMAG=0), grand minimum

Sum of electronic and zero-point Energies (hartrees)= -233.796480

Cartesian Coordinates (Angstroms)

|   | X         | Y         | Z         |
|---|-----------|-----------|-----------|
| C | -2.546162 | -0.819074 | 0.057105  |
| C | -2.061870 | 0.377613  | -0.185208 |
| C | -0.610328 | 0.796492  | -0.110660 |
| C | 0.359514  | -0.338187 | 0.261534  |
| C | 1.780335  | 0.136756  | 0.390346  |
| C | 2.803090  | -0.283001 | -0.355628 |
| H | 1.961841  | 0.892062  | 1.157964  |
| H | -2.759837 | 1.176983  | -0.472980 |
| H | -3.517889 | -1.296366 | 0.057747  |
| H | 3.810333  | 0.101124  | -0.217140 |
| H | 2.672172  | -1.033663 | -1.132873 |
| H | 0.294640  | -1.134052 | -0.490149 |
| H | 0.025404  | -0.778311 | 1.212369  |
| H | -0.314138 | 1.230666  | -1.076554 |

H        -0.520003   1.617962   0.616689

Other minima (not appeared in the text)

Sum of electronic and zero-point Energies (hartrees)=        -233.795270

Cartesian Coordinates (Angstroms)

|   | X         | Y         | Z         |
|---|-----------|-----------|-----------|
| C | -2.637892 | -0.547567 | -0.000621 |
| C | -1.924845 | 0.555801  | -0.000115 |
| C | -0.416023 | 0.661451  | 0.001013  |
| C | 0.307392  | -0.686202 | 0.000258  |
| C | 1.812736  | -0.620365 | 0.000297  |
| C | 2.572554  | 0.476187  | -0.000798 |
| H | 2.307538  | -1.593025 | 0.000931  |
| H | -2.454494 | 1.519334  | -0.000417 |
| H | -3.687652 | -0.812406 | -0.001323 |
| H | 3.657164  | 0.410033  | -0.000818 |
| H | 2.153915  | 1.479147  | -0.001585 |
| H | -0.022702 | -1.270943 | -0.871233 |
| H | -0.023143 | -1.272189 | 0.870738  |
| H | -0.106562 | 1.252933  | -0.873175 |

H -0.107592 1.251295 0.876678

Sum of electronic and zero-point Energies (hartrees)= -233.796278

Cartesian Coordinates (Angstroms)

|   | X         | Y         | Z         |
|---|-----------|-----------|-----------|
| C | -3.047943 | -0.255136 | 0.180409  |
| C | -1.956054 | 0.372474  | -0.191489 |
| C | -0.619380 | -0.273667 | -0.479788 |
| C | 0.488760  | 0.212673  | 0.483534  |
| C | 1.820723  | -0.426118 | 0.199532  |
| C | 2.926332  | 0.226781  | -0.160508 |
| H | 1.853994  | -1.513481 | 0.291601  |
| H | -1.981812 | 1.467059  | -0.295451 |
| H | -4.069067 | 0.004734  | 0.430747  |
| H | 3.860440  | -0.292286 | -0.358501 |
| H | 2.941181  | 1.310028  | -0.266532 |
| H | 0.175510  | -0.019580 | 1.511596  |
| H | 0.579881  | 1.305102  | 0.420530  |
| H | -0.315800 | -0.040492 | -1.509945 |
| H | -0.718958 | -1.363128 | -0.414184 |

Sum of electronic and zero-point Energies (hartrees)= -233.795187

Cartesian Coordinates (Angstroms)

|   | X         | Y         | Z         |
|---|-----------|-----------|-----------|
| C | 2.891994  | -0.304107 | -0.449172 |
| C | 1.905761  | 0.059865  | 0.337854  |
| C | 0.463200  | -0.375689 | 0.208008  |
| C | -0.479283 | 0.812427  | -0.041682 |
| C | -1.946212 | 0.477124  | -0.133805 |
| C | -2.501963 | -0.731112 | -0.032393 |
| H | -2.597278 | 1.336069  | -0.304908 |
| H | 2.116376  | 0.751614  | 1.166704  |
| H | 3.955518  | -0.116261 | -0.529735 |
| H | -3.577035 | -0.865192 | -0.115861 |
| H | -1.917750 | -1.631830 | 0.135544  |
| H | -0.173229 | 1.323824  | -0.966646 |
| H | -0.340991 | 1.561286  | 0.754387  |
| H | 0.159053  | -0.886580 | 1.132825  |
| H | 0.374353  | -1.103976 | -0.605174 |

Sum of electronic and zero-point Energies (hartrees)= -233.796287

Cartesian Coordinates (Angstroms)

|   | X         | Y         | Z         |
|---|-----------|-----------|-----------|
| C | 2.919661  | 0.645190  | -0.163178 |
| C | 2.003214  | -0.245337 | 0.138991  |
| C | 0.629640  | -0.349922 | -0.484834 |
| C | -0.501807 | -0.164849 | 0.552846  |
| C | -1.869009 | -0.361594 | -0.042616 |
| C | -2.828541 | 0.563269  | -0.088110 |
| H | -2.060632 | -1.345579 | -0.475584 |
| H | 2.220469  | -0.985539 | 0.923191  |
| H | 3.927167  | 0.887990  | 0.151114  |
| H | -3.797531 | 0.362858  | -0.537647 |
| H | -2.682468 | 1.558455  | 0.327686  |
| H | -0.425147 | 0.833838  | 0.999515  |
| H | -0.349136 | -0.888274 | 1.368828  |
| H | 0.522691  | -1.338971 | -0.954903 |
| H | 0.525637  | 0.394682  | -1.280801 |

Sum of electronic and zero-point Energies (hartrees)= -233.795173

Cartesian Coordinates (Angstroms)

|   | X         | Y         | Z         |
|---|-----------|-----------|-----------|
| C | -1.979100 | -1.097806 | 0.269812  |
| C | -1.859676 | 0.049383  | -0.358348 |
| C | -0.730692 | 1.050887  | -0.236981 |
| C | 0.461565  | 0.613108  | 0.636975  |
| C | 1.294913  | -0.482402 | 0.027136  |
| C | 2.588297  | -0.371886 | -0.279080 |
| H | 0.777237  | -1.420046 | -0.173800 |
| H | -2.664706 | 0.350763  | -1.044489 |
| H | -2.697650 | -1.906412 | 0.313576  |
| H | 3.145038  | -1.193853 | -0.721714 |
| H | 3.144561  | 0.545738  | -0.094342 |
| H | 0.070605  | 0.281594  | 1.609946  |
| H | 1.097180  | 1.486568  | 0.827947  |
| H | -0.372947 | 1.305363  | -1.244856 |
| H | -1.151168 | 1.982580  | 0.170648  |

Sum of electronic and zero-point Energies (hartrees)= -233.792950

Cartesian Coordinates (Angstroms)

|   | X         | Y         | Z         |
|---|-----------|-----------|-----------|
| C | 1.678738  | -0.999442 | -0.680551 |
| C | 1.641958  | -0.142973 | 0.313963  |
| C | 0.627551  | 0.960239  | 0.534295  |
| C | -0.521128 | 1.031319  | -0.479843 |
| C | -1.604271 | -0.013382 | -0.366583 |
| C | -1.686327 | -1.004852 | 0.520756  |
| H | -2.404096 | 0.092124  | -1.101766 |
| H | 2.435285  | -0.191159 | 1.074194  |
| H | 2.307932  | -1.822203 | -0.995312 |
| H | -2.527458 | -1.692967 | 0.519692  |
| H | -0.919173 | -1.182475 | 1.269117  |
| H | -0.104256 | 1.000097  | -1.497150 |
| H | -0.999064 | 2.018960  | -0.393656 |
| H | 0.222217  | 0.874902  | 1.552805  |
| H | 1.169486  | 1.917263  | 0.519858  |



Sum of electronic and zero-point Energies (hartrees)= -233.794743

Cartesian Coordinates (Angstroms)

|   | X         | Y         | Z         |
|---|-----------|-----------|-----------|
| C | 1.306310  | 1.461156  | 0.184777  |
| C | 1.750246  | 0.284441  | -0.193356 |
| C | 1.019920  | -1.037646 | -0.102698 |
| C | -0.399462 | -0.972752 | 0.490151  |
| C | -1.398065 | -0.261874 | -0.382928 |
| C | -2.184345 | 0.744048  | 0.001773  |
| H | -1.475164 | -0.631486 | -1.407827 |
| H | 2.763446  | 0.217448  | -0.616078 |
| H | 1.677818  | 2.478230  | 0.187758  |
| H | -2.899684 | 1.203166  | -0.675542 |
| H | -2.140097 | 1.149395  | 1.010519  |
| H | -0.364176 | -0.497716 | 1.477988  |
| H | -0.739391 | -2.007892 | 0.645492  |
| H | 0.980538  | -1.486885 | -1.107180 |
| H | 1.629090  | -1.728503 | 0.498557  |

Sum of electronic and zero-point Energies (hartrees)= -233.795671

Cartesian Coordinates (Angstroms)

|   | X         | Y         | Z         |
|---|-----------|-----------|-----------|
| C | -2.356295 | -1.018915 | -0.241612 |
| C | -1.767824 | 0.046770  | 0.251547  |
| C | -0.727405 | 0.894184  | -0.447441 |
| C | 0.635415  | 0.910930  | 0.288056  |
| C | 1.337703  | -0.419390 | 0.279489  |
| C | 2.564547  | -0.631051 | -0.198493 |
| H | 0.773842  | -1.257251 | 0.690219  |
| H | -2.029161 | 0.372587  | 1.269532  |
| H | -3.101116 | -1.736253 | 0.080280  |
| H | 3.023962  | -1.615942 | -0.182095 |
| H | 3.160411  | 0.174740  | -0.623807 |
| H | 0.463447  | 1.230616  | 1.327951  |
| H | 1.280319  | 1.671400  | -0.169839 |
| H | -1.098581 | 1.927249  | -0.507917 |
| H | -0.589970 | 0.537678  | -1.473599 |

Sum of electronic and zero-point Energies (hartrees)= -233.793616

Cartesian Coordinates (Angstroms)

|   | X         | Y         | Z         |
|---|-----------|-----------|-----------|
| C | -2.262900 | 0.858226  | 0.038254  |
| C | -1.512774 | -0.148628 | -0.345520 |
| C | -0.531584 | -0.913806 | 0.517958  |
| C | 0.856541  | -1.100763 | -0.119717 |
| C | 1.734528  | 0.120560  | -0.234047 |
| C | 1.460310  | 1.356978  | 0.183551  |
| H | 2.702391  | -0.067172 | -0.702744 |
| H | -1.598481 | -0.506600 | -1.382268 |
| H | -3.013454 | 1.503587  | -0.400763 |
| H | 2.181689  | 2.161078  | 0.063242  |
| H | 0.513530  | 1.621533  | 0.644238  |
| H | 0.736281  | -1.544115 | -1.121191 |
| H | 1.404276  | -1.860599 | 0.458518  |
| H | -0.949195 | -1.914364 | 0.702040  |
| H | -0.441764 | -0.428745 | 1.496050  |

Sum of electronic and zero-point Energies (hartrees)= -233.795362

Cartesian Coordinates (Angstroms)

|   | X         | Y         | Z         |
|---|-----------|-----------|-----------|
| C | -2.254714 | -1.047625 | -0.287014 |
| C | -1.554391 | -0.176102 | 0.401218  |
| C | -0.834353 | 1.028011  | -0.163502 |
| C | 0.675944  | 1.049878  | 0.169623  |
| C | 1.450064  | -0.075129 | -0.461619 |
| C | 2.218944  | -0.944957 | 0.193590  |
| H | 1.356844  | -0.162017 | -1.545898 |
| H | -1.463090 | -0.309291 | 1.489215  |
| H | -2.829323 | -1.942983 | -0.084619 |
| H | 2.760098  | -1.733760 | -0.322164 |
| H | 2.338743  | -0.901229 | 1.274580  |
| H | 0.815383  | 1.030172  | 1.258757  |
| H | 1.080609  | 2.011558  | -0.180260 |
| H | -1.289708 | 1.941240  | 0.246206  |
| H | -0.978524 | 1.061852  | -1.249587 |

Sum of electronic and zero-point Energies (hartrees)= -233.794935

Cartesian Coordinates (Angstroms)

|   | X         | Y         | Z         |
|---|-----------|-----------|-----------|
| C | -2.834943 | -0.344389 | 0.210975  |
| C | -1.612915 | -0.400571 | -0.267453 |
| C | -0.682352 | 0.780531  | -0.436916 |
| C | 0.561060  | 0.737968  | 0.488852  |
| C | 1.458021  | -0.449324 | 0.263370  |
| C | 2.704990  | -0.386454 | -0.206152 |
| H | 1.036892  | -1.425735 | 0.506721  |
| H | -1.208997 | -1.376500 | -0.569898 |
| H | -3.643435 | -1.037249 | 0.409574  |
| H | 3.308824  | -1.278081 | -0.353536 |
| H | 3.173683  | 0.563407  | -0.457505 |
| H | 0.210698  | 0.742602  | 1.530811  |
| H | 1.135420  | 1.660981  | 0.338991  |
| H | -1.237531 | 1.704308  | -0.241311 |
| H | -0.338719 | 0.819695  | -1.479898 |

Sum of electronic and zero-point Energies (hartrees)= -233.793560

Cartesian Coordinates (Angstroms)

|   | X         | Y         | Z         |
|---|-----------|-----------|-----------|
| C | 2.698991  | -0.342302 | -0.280966 |
| C | 1.412342  | -0.444516 | -0.037280 |
| C | 0.567733  | 0.604891  | 0.655193  |
| C | -0.620503 | 1.091050  | -0.196028 |
| C | -1.757213 | 0.119254  | -0.402285 |
| C | -1.948255 | -1.049960 | 0.211397  |
| H | -2.503038 | 0.447331  | -1.128333 |
| H | 0.879309  | -1.344560 | -0.369578 |
| H | 3.467134  | -0.946929 | -0.747704 |
| H | -2.820543 | -1.661752 | -0.001925 |
| H | -1.255344 | -1.445822 | 0.949461  |
| H | -0.246328 | 1.411682  | -1.179006 |
| H | -1.034523 | 2.001994  | 0.264195  |
| H | 1.202893  | 1.461193  | 0.904297  |
| H | 0.191877  | 0.206363  | 1.608406  |

Sum of electronic and zero-point Energies (hartrees)= -233.795978

Cartesian Coordinates (Angstroms)

|   | X         | Y         | Z         |
|---|-----------|-----------|-----------|
| C | -2.632653 | -0.690262 | 0.217793  |
| C | -1.451305 | -0.398177 | -0.275906 |
| C | -0.781591 | 0.956084  | -0.207652 |
| C | 0.610690  | 0.910804  | 0.468468  |
| C | 1.629807  | 0.127394  | -0.313739 |
| C | 2.265131  | -0.963496 | 0.117588  |
| H | 1.844320  | 0.501767  | -1.317180 |
| H | -0.869816 | -1.186089 | -0.773603 |
| H | -3.274258 | -1.561067 | 0.276242  |
| H | 2.994244  | -1.483828 | -0.498008 |
| H | 2.083692  | -1.374711 | 1.108718  |
| H | 0.512614  | 0.495085  | 1.478684  |
| H | 0.962692  | 1.947001  | 0.580888  |
| H | -1.428352 | 1.655297  | 0.332824  |
| H | -0.665609 | 1.352470  | -1.227868 |

**Transition structure 7'f/8'f (5-*exo*) (NIMAG=1)**

Sum of electronic and zero-point Energies (hartrees)= -233.790283

Cartesian Coordinates (Angstroms)

|   | X         | Y         | Z         |
|---|-----------|-----------|-----------|
| C | 1.334724  | -0.857163 | 0.085342  |
| C | 1.595442  | 0.623042  | -0.090632 |
| C | 0.596174  | 1.477967  | -0.048281 |
| C | -1.077779 | -0.126204 | 0.424024  |
| C | -2.236084 | 0.276564  | -0.157046 |
| C | -0.151813 | -1.156338 | -0.181831 |
| H | 2.634928  | 0.947356  | -0.217972 |
| H | 0.496116  | 2.554697  | -0.116795 |
| H | -0.932441 | 0.083914  | 1.483885  |
| H | -2.471101 | 0.022986  | -1.188255 |
| H | -2.941458 | 0.918680  | 0.362507  |
| H | -0.329223 | -1.195608 | -1.263591 |
| H | -0.400371 | -2.149433 | 0.219127  |
| H | 1.971915  | -1.455639 | -0.578669 |



H 1.607649 -1.154160 1.110303

Other Transition structure (5-*exo*) (NIMAG=1)---higher energy, (not appeared in the text)

Sum of electronic and zero-point Energies (hartrees)= -233.787149

Cartesian Coordinates (Angstroms)

|   | X         | Y         | Z         |
|---|-----------|-----------|-----------|
| C | 1.042322  | -0.931772 | 0.378426  |
| C | 1.556316  | 0.481351  | 0.216236  |
| C | 0.779265  | 1.410473  | -0.297513 |
| C | -1.154439 | 0.054934  | -0.472079 |
| H | -1.378238 | 0.530766  | -1.424311 |
| C | -0.202776 | -1.130673 | -0.509728 |
| H | 2.574133  | 0.698342  | 0.559592  |
| H | 0.862522  | 2.478029  | -0.466074 |
| C | -1.946511 | 0.349814  | 0.590108  |
| H | -2.676958 | 1.152684  | 0.549047  |
| H | -1.840394 | -0.162509 | 1.544024  |
| H | 0.130994  | -1.278251 | -1.542697 |
| H | -0.729903 | -2.045211 | -0.209587 |
| H | 1.813705  | -1.669439 | 0.119863  |

H 0.799084 -1.109171 1.437445

**Transition structure 7'f/10'f (6-endo) (NIMAG=1)**

Sum of electronic and zero-point Energies (hartrees)= -233.785716

Cartesian Coordinates (Angstroms)

|   | X         | Y         | Z         |
|---|-----------|-----------|-----------|
| C | 1.136698  | -0.926371 | -0.119393 |
| C | 1.457653  | 0.555410  | -0.031874 |
| C | 0.605331  | 1.564063  | 0.006765  |
| C | -1.654451 | 0.755364  | 0.135098  |
| C | -0.295296 | -1.309862 | 0.333594  |
| C | -1.304971 | -0.451658 | -0.367114 |
| H | 2.533693  | 0.778920  | -0.023942 |
| H | 0.785675  | 2.634678  | 0.050740  |
| H | -1.524536 | 0.986440  | 1.188445  |
| H | -2.257756 | 1.457399  | -0.434741 |
| H | -1.538577 | -0.691680 | -1.404121 |
| H | -0.455142 | -2.377646 | 0.136380  |
| H | -0.370441 | -1.160660 | 1.417873  |
| H | 1.293993  | -1.260827 | -1.156451 |

H 1.863312 -1.488296 0.483364

**Product 8'f (NIMAG=0)**

Sum of electronic and zero-point Energies (hartrees)= -233.850204

Cartesian Coordinates (Angstroms)

|   | X         | Y         | Z         |
|---|-----------|-----------|-----------|
| C | 1.425184  | 0.382812  | -0.186330 |
| C | 0.324070  | 1.398650  | -0.003623 |
| C | -0.969609 | 1.075244  | 0.086153  |
| C | -1.487438 | -0.339419 | -0.015411 |
| C | 0.987357  | -1.028051 | 0.264222  |
| C | -0.398819 | -1.350488 | -0.192678 |
| H | 0.618408  | 2.446236  | 0.049029  |
| H | -1.714677 | 1.857922  | 0.223338  |
| H | -2.093828 | -0.565621 | 0.885404  |
| H | -2.210872 | -0.406899 | -0.845262 |
| H | -0.668169 | -2.374648 | -0.437279 |
| H | 1.702108  | -1.781190 | -0.088452 |
| H | 1.035725  | -1.057259 | 1.369825  |
| H | 1.728785  | 0.357186  | -1.244209 |

H 2.318051 0.691786 0.373601

**Product 9'f (NIMAG=0)**

Sum of electronic and zero-point Energies (hartrees)= -233.835567

Cartesian Coordinates (Angstroms)

|   | X         | Y         | Z         |
|---|-----------|-----------|-----------|
| C | -1.465046 | 0.143790  | 0.321851  |
| C | -0.580504 | 1.252459  | -0.174476 |
| C | 0.774353  | 0.754186  | -0.436197 |
| C | 0.701042  | -0.770193 | -0.397133 |
| C | 1.442431  | -0.054692 | 0.692093  |
| C | -0.754606 | -1.160162 | -0.147207 |
| H | -0.850891 | 2.302865  | -0.145927 |
| H | 1.432766  | 1.280300  | -1.123113 |
| H | 1.277572  | -1.363243 | -1.102735 |
| H | 1.011591  | 0.001635  | 1.689155  |
| H | 2.528585  | -0.105497 | 0.676715  |
| H | -0.858344 | -1.974951 | 0.579447  |
| H | -1.195254 | -1.507583 | -1.089626 |
| H | -1.559197 | 0.160484  | 1.422032  |

H            -2.492851   0.213660   -0.059535

**Product 10<sup>9</sup>f (NIMAG=0)**

Sum of electronic and zero-point Energies (hartrees)=        -233.850204

Cartesian Coordinates (Angstroms)

|   | X         | Y         | Z         |
|---|-----------|-----------|-----------|
| C | 1.425184  | 0.382812  | -0.186330 |
| C | 0.324070  | 1.398650  | -0.003623 |
| C | -0.969609 | 1.075244  | 0.086153  |
| C | -1.487438 | -0.339419 | -0.015411 |
| C | 0.987357  | -1.028051 | 0.264222  |
| C | -0.398819 | -1.350488 | -0.192678 |
| H | 0.618408  | 2.446236  | 0.049029  |
| H | -1.714677 | 1.857922  | 0.223338  |
| H | -2.093828 | -0.565621 | 0.885404  |
| H | -2.210872 | -0.406899 | -0.845262 |
| H | -0.668169 | -2.374648 | -0.437279 |
| H | 1.702108  | -1.781190 | -0.088452 |
| H | 1.035725  | -1.057259 | 1.369825  |
| H | 1.728785  | 0.357186  | -1.244209 |

H 2.318051 0.691786 0.373601

**Transition structure 8'f'9'f (NIMAG=1)**

Sum of electronic and zero-point Energies (hartrees)= -233.822741

Cartesian Coordinates (Angstroms)

|   | X         | Y         | Z         |
|---|-----------|-----------|-----------|
| C | -0.552469 | -1.208351 | -0.236631 |
| C | -1.466630 | -0.103400 | 0.368908  |
| C | -0.793186 | 1.183289  | -0.041630 |
| C | 0.497355  | 0.943898  | -0.489738 |
| C | 0.806797  | -0.528649 | -0.477879 |
| C | 1.569898  | -0.107337 | 0.720210  |
| H | -1.217921 | 2.166103  | 0.135340  |
| H | 1.162833  | 1.683272  | -0.919895 |
| H | 1.395065  | -0.937826 | -1.302069 |
| H | 1.125425  | -0.152222 | 1.707265  |
| H | 2.616764  | 0.163822  | 0.643185  |
| H | -0.471634 | -2.093389 | 0.403591  |
| H | -0.956001 | -1.533244 | -1.202609 |
| H | -1.524065 | -0.189698 | 1.466477  |

H -2.501060 -0.183519 0.009279

**Transition structure 9'f/10'f (NIMAG=1)**

Sum of electronic and zero-point Energies (hartrees)= -233.820162

Cartesian Coordinates (Angstroms)

|   | X         | Y         | Z         |
|---|-----------|-----------|-----------|
| C | 0.647489  | -0.973228 | -0.393487 |
| C | 1.399107  | -0.162303 | 0.595955  |
| C | 0.835151  | 0.935005  | -0.264184 |
| C | -0.508051 | 1.295150  | -0.171968 |
| C | -1.390726 | 0.216324  | 0.394090  |
| C | -0.837354 | -1.127564 | -0.195697 |
| H | -0.913928 | 2.102772  | -0.772891 |
| H | 1.519507  | 1.462467  | -0.924163 |
| H | 2.484387  | -0.251952 | 0.543814  |
| H | 1.055160  | -0.198331 | 1.634525  |
| H | 1.164069  | -1.448541 | -1.219397 |
| H | -1.077948 | -1.970808 | 0.469703  |
| H | -1.321067 | -1.333977 | -1.158310 |
| H | -2.447401 | 0.360384  | 0.145663  |

H            -1.336476   0.177685   1.492806

**---Cyclization and rearrangement reactions of 7'g ----**

**Reactant 7'g (NIMAG=0)**

grand minimum

Sum of electronic and zero-point Energies (hartrees)=        -592.697770

Cartesian Coordinates (Angstroms)

|   | X         | Y         | Z         |
|---|-----------|-----------|-----------|
| C | -2.504770 | 1.194941  | 0.154011  |
| C | -1.296802 | 0.790000  | -0.153837 |
| S | -0.832316 | -0.950763 | -0.182824 |
| C | 0.878456  | -0.855906 | 0.533472  |
| C | 1.826763  | -0.073169 | -0.320019 |
| C | 2.415874  | 1.063312  | 0.060313  |
| H | -0.504384 | 1.473994  | -0.459117 |
| H | -3.451318 | 0.766290  | 0.455006  |
| H | 2.010851  | -0.474251 | -1.316139 |
| H | 2.247291  | 1.492439  | 1.046016  |
| H | 3.097403  | 1.599643  | -0.594171 |
| H | 0.820124  | -0.453115 | 1.548841  |



H 1.179970 -1.907861 0.601091

other minima (not appeared in the text)

Sum of electronic and zero-point Energies (hartrees)= -592.697051

Cartesian Coordinates (Angstroms)

|   | X         | Y         | Z         |
|---|-----------|-----------|-----------|
| C | -0.890399 | 1.904501  | 0.156262  |
| C | -1.613866 | 0.859081  | -0.156196 |
| S | -1.175973 | -0.885977 | -0.105545 |
| C | 0.537942  | -0.880115 | 0.568109  |
| C | 1.586832  | -0.380513 | -0.382574 |
| C | 2.500660  | 0.541940  | -0.076932 |
| H | -2.645266 | 0.963179  | -0.495771 |
| H | 0.102898  | 2.173937  | 0.477736  |
| H | 1.582590  | -0.835211 | -1.372372 |
| H | 2.534309  | 1.014040  | 0.903422  |
| H | 3.257365  | 0.853327  | -0.791426 |
| H | 0.550139  | -0.324453 | 1.511671  |
| H | 0.706520  | -1.938553 | 0.803443  |

Sum of electronic and zero-point Energies (hartrees)= -592.696747

Cartesian Coordinates (Angstroms)

|   | X         | Y         | Z         |
|---|-----------|-----------|-----------|
| C | -2.168248 | 1.439232  | -0.193381 |
| C | -1.394775 | 0.631725  | 0.490483  |
| S | -0.887659 | -0.979890 | -0.136460 |
| C | 0.915231  | -0.964291 | 0.299367  |
| C | 1.711851  | 0.043142  | -0.469427 |
| C | 2.373574  | 1.058612  | 0.087679  |
| H | -1.061139 | 0.860869  | 1.503156  |
| H | -2.650131 | 1.465097  | -1.161650 |
| H | 1.717900  | -0.081988 | -1.551540 |
| H | 2.378803  | 1.217821  | 1.164185  |
| H | 2.937927  | 1.768444  | -0.510470 |
| H | 1.017218  | -0.814554 | 1.379685  |
| H | 1.236164  | -1.987968 | 0.071663  |

Sum of electronic and zero-point Energies (hartrees)= -592.695413

Cartesian Coordinates (Angstroms)

|   | X         | Y         | Z         |
|---|-----------|-----------|-----------|
| C | -1.265974 | 1.662540  | 0.506089  |
| C | -1.670897 | 0.595040  | -0.135812 |
| S | -0.808673 | -0.970992 | -0.356367 |
| C | 0.616709  | -0.806126 | 0.781665  |
| C | 1.780981  | 0.046723  | 0.342420  |
| C | 1.917402  | 0.699429  | -0.810209 |
| H | -2.644511 | 0.555648  | -0.624797 |
| H | -0.408971 | 2.035188  | 1.046357  |
| H | 2.580793  | 0.099154  | 1.083952  |
| H | 1.147091  | 0.675612  | -1.575744 |
| H | 2.810443  | 1.280087  | -1.022960 |
| H | 0.230640  | -0.457000 | 1.748024  |
| H | 0.953956  | -1.838451 | 0.942128  |

Sum of electronic and zero-point Energies (hartrees)= -592.694233

Cartesian Coordinates (Angstroms)

|   | X         | Y         | Z         |
|---|-----------|-----------|-----------|
| C | -2.397620 | 1.087659  | 0.200308  |
| C | -1.484432 | 0.237776  | 0.601310  |
| S | -0.590018 | -0.862362 | -0.512112 |
| C | 1.027272  | -0.974713 | 0.350933  |
| C | 1.946318  | 0.218310  | 0.282210  |
| C | 1.741698  | 1.361940  | -0.368180 |
| H | -1.243669 | 0.102489  | 1.656960  |
| H | -2.856180 | 1.421501  | -0.720218 |
| H | 2.872996  | 0.082551  | 0.843623  |
| H | 0.834204  | 1.545657  | -0.934961 |
| H | 2.483255  | 2.155487  | -0.349550 |
| H | 0.837191  | -1.245536 | 1.398395  |
| H | 1.513079  | -1.850191 | -0.099943 |

Sum of electronic and zero-point Energies (hartrees)= -592.694509

Cartesian Coordinates (Angstroms)

|   | X         | Y         | Z         |
|---|-----------|-----------|-----------|
| C | -2.680747 | 0.779503  | 0.392427  |
| C | -1.384070 | 0.696770  | 0.222806  |
| S | -0.597377 | -0.726831 | -0.561968 |
| C | 0.860381  | -0.947634 | 0.538189  |
| C | 1.953918  | 0.088886  | 0.454336  |
| C | 2.091753  | 1.050532  | -0.457528 |
| H | -0.701473 | 1.499869  | 0.499774  |
| H | -3.562871 | 0.183388  | 0.200715  |
| H | 2.701734  | -0.004293 | 1.244228  |
| H | 1.376298  | 1.182142  | -1.264600 |
| H | 2.935370  | 1.734063  | -0.426397 |
| H | 0.503004  | -1.039652 | 1.570401  |
| H | 1.258564  | -1.934566 | 0.265993  |

Sum of electronic and zero-point Energies (hartrees)= -592.696248

Cartesian Coordinates (Angstroms)

|   | X         | Y         | Z         |
|---|-----------|-----------|-----------|
| C | -1.806573 | 1.547741  | 0.158063  |
| C | -1.938443 | 0.318783  | -0.277954 |
| S | -0.795672 | -1.062598 | -0.152766 |
| C | 0.629968  | -0.310455 | 0.747536  |
| C | 1.529703  | 0.511264  | -0.127338 |
| C | 2.829483  | 0.268092  | -0.299448 |
| H | -2.841122 | 0.002294  | -0.802068 |
| H | -1.112936 | 2.192510  | 0.676002  |
| H | 1.062712  | 1.348534  | -0.643709 |
| H | 3.328033  | -0.564406 | 0.193269  |
| H | 3.446100  | 0.892475  | -0.939919 |
| H | 0.211623  | 0.274708  | 1.575214  |
| H | 1.171516  | -1.157100 | 1.180312  |

Sum of electronic and zero-point Energies (hartrees)= -592.695878

Cartesian Coordinates (Angstroms)

|   | X         | Y         | Z         |
|---|-----------|-----------|-----------|
| C | -2.489704 | 1.200234  | -0.130585 |
| C | -1.770004 | 0.292223  | 0.484101  |
| S | -0.725821 | -0.872723 | -0.412212 |
| C | 0.857937  | -0.688887 | 0.537753  |
| C | 1.606944  | 0.569811  | 0.223439  |
| C | 2.833330  | 0.604936  | -0.299383 |
| H | -1.804279 | 0.152169  | 1.565617  |
| H | -2.666659 | 1.529526  | -1.146078 |
| H | 1.084732  | 1.499843  | 0.445410  |
| H | 3.380902  | -0.304261 | -0.539928 |
| H | 3.337618  | 1.544443  | -0.507741 |
| H | 0.602639  | -0.752340 | 1.602806  |
| H | 1.447164  | -1.575714 | 0.283354  |

Sum of electronic and zero-point Energies (hartrees)= -592.694734

Cartesian Coordinates (Angstroms)

|   | X         | Y         | Z         |
|---|-----------|-----------|-----------|
| C | -2.886818 | 0.670863  | 0.236446  |
| C | -1.653950 | 0.702646  | -0.210033 |
| S | -0.685470 | -0.815395 | -0.356349 |
| C | 0.779070  | -0.418136 | 0.720745  |
| C | 1.727040  | 0.578614  | 0.127860  |
| C | 2.982063  | 0.302234  | -0.229438 |
| H | -1.182226 | 1.616580  | -0.568781 |
| H | -3.577677 | -0.077039 | 0.604703  |
| H | 1.344017  | 1.590319  | -0.003833 |
| H | 3.404178  | -0.693885 | -0.112477 |
| H | 3.635809  | 1.060138  | -0.651928 |
| H | 0.386249  | -0.083566 | 1.686799  |
| H | 1.272743  | -1.383550 | 0.873628  |



**Transition structure 7'g/8'g (5-exo) (NIMAG=1)**

Sum of electronic and zero-point Energies (hartrees)= -592.691591

Cartesian Coordinates (Angstroms)

|   | X         | Y         | Z         |
|---|-----------|-----------|-----------|
| S | -1.449938 | -0.652299 | -0.073010 |
| C | -1.243595 | 1.114322  | 0.070214  |
| C | -0.060685 | 1.684225  | 0.095268  |
| C | 1.305314  | -0.211857 | -0.426948 |
| C | 2.531516  | 0.030764  | 0.096349  |
| C | 0.303006  | -1.111646 | 0.249094  |
| H | -2.193044 | 1.653743  | 0.115373  |
| H | 0.313258  | 2.695351  | 0.178617  |
| H | 1.122426  | 0.004609  | -1.477862 |
| H | 2.779657  | -0.243716 | 1.118779  |
| H | 3.293202  | 0.559450  | -0.468913 |
| H | 0.476970  | -1.131437 | 1.329845  |
| H | 0.393213  | -2.136069 | -0.131544 |

Other Transition structure (5-*exo*) (NIMAG=1)···higher energy

(not appeared in the text)

Sum of electronic and zero-point Energies (hartrees)= -592.689245

Cartesian Coordinates (Angstroms)

|   | X         | Y         | Z         |
|---|-----------|-----------|-----------|
| S | -1.214991 | -0.734131 | -0.287148 |
| C | -1.213551 | 1.041299  | -0.137909 |
| C | -0.184723 | 1.700182  | 0.347857  |
| C | 1.435569  | -0.069542 | 0.423665  |
| H | 1.899712  | 0.392572  | 1.292569  |
| C | 0.296564  | -1.019248 | 0.728802  |
| H | -2.136766 | 1.507129  | -0.489581 |
| H | 0.065402  | 2.742661  | 0.493147  |
| C | 2.066075  | 0.006609  | -0.772176 |
| H | 2.946782  | 0.627668  | -0.904582 |
| H | 1.673872  | -0.490557 | -1.655575 |
| H | 0.008661  | -0.930324 | 1.779674  |
| H | 0.582591  | -2.058863 | 0.537286  |

**Transition structure 7'g/10'g (6-endo) (NIMAG=1)**

Sum of electronic and zero-point Energies (hartrees)= -592.689678

Cartesian Coordinates (Angstroms)

|   | X         | Y         | Z         |
|---|-----------|-----------|-----------|
| S | 1.412024  | -0.457534 | -0.091702 |
| C | 0.921757  | 1.259483  | -0.045533 |
| C | -0.275751 | 1.784724  | 0.123110  |
| C | -2.082180 | 0.165235  | 0.049451  |
| C | -0.149343 | -1.333686 | 0.403808  |
| C | -1.293883 | -0.833272 | -0.408448 |
| H | 1.804160  | 1.890641  | -0.196564 |
| H | -0.601598 | 2.817970  | 0.154246  |
| H | -2.128152 | 0.408836  | 1.106856  |
| H | -2.833381 | 0.629719  | -0.583215 |
| H | -1.322193 | -1.120547 | -1.457381 |
| H | 0.076369  | -2.391517 | 0.235767  |
| H | -0.311187 | -1.169457 | 1.473192  |

**Product 8'g (NIMAG=0)**

Sum of electronic and zero-point Energies (hartrees)= -592.743268

Cartesian Coordinates (Angstroms)

|   | X         | Y         | Z         |
|---|-----------|-----------|-----------|
| S | 1.600953  | -0.440753 | 0.005209  |
| C | 0.929471  | 1.199674  | -0.114441 |
| C | -0.392385 | 1.288307  | 0.056525  |
| C | -1.092749 | -0.019954 | 0.391120  |
| C | -2.452915 | -0.179785 | -0.201919 |
| C | -0.115046 | -1.135600 | -0.095784 |
| H | 1.611785  | 2.024809  | -0.287471 |
| H | -0.936445 | 2.227778  | 0.037420  |
| H | -1.172741 | -0.092516 | 1.488463  |
| H | -3.255878 | -0.660250 | 0.347057  |
| H | -2.623407 | 0.065217  | -1.246348 |
| H | -0.315597 | -1.385313 | -1.142227 |
| H | -0.181229 | -2.043523 | 0.506750  |

**Product 9'g (NIMAG=0)**

Sum of electronic and zero-point Energies (hartrees) = -592.746952

Cartesian Coordinates (Angstroms)

|   | X         | Y         | Z         |
|---|-----------|-----------|-----------|
| S | 0.000000  | 0.000000  | 0.000000  |
| C | 0.000000  | 0.000000  | 1.749205  |
| C | 1.352359  | 0.000000  | 2.327168  |
| C | 2.388594  | 0.339387  | 1.265804  |
| C | 2.366040  | -1.045738 | 1.848048  |
| C | 1.757857  | 0.601554  | -0.091416 |
| H | -0.899171 | -0.306562 | 2.269963  |
| H | 1.469028  | 0.378576  | 3.340408  |
| H | 3.217759  | 0.991089  | 1.531153  |
| H | 1.992470  | -1.865249 | 1.239740  |
| H | 3.167849  | -1.312280 | 2.531767  |
| H | 2.253051  | 0.072148  | -0.911179 |
| H | 1.754880  | 1.672111  | -0.317999 |

**Product 10'g (NIMAG=0)**

Sum of electronic and zero-point Energies (hartrees) = -592.746952

Cartesian Coordinates (Angstroms)

|   | X         | Y         | Z         |
|---|-----------|-----------|-----------|
| S | 0.000000  | 0.000000  | 0.000000  |
| C | 0.000000  | 0.000000  | 1.749205  |
| C | 1.352359  | 0.000000  | 2.327168  |
| C | 2.388594  | 0.339387  | 1.265804  |
| C | 2.366040  | -1.045738 | 1.848048  |
| C | 1.757857  | 0.601554  | -0.091416 |
| H | -0.899171 | -0.306562 | 2.269963  |
| H | 1.469028  | 0.378576  | 3.340408  |
| H | 3.217759  | 0.991089  | 1.531153  |
| H | 1.992470  | -1.865249 | 1.239740  |
| H | 3.167849  | -1.312280 | 2.531767  |
| H | 2.253051  | 0.072148  | -0.911179 |
| H | 1.754880  | 1.672111  | -0.317999 |

**Transition structure 8'g/9'g (NIMAG=1)**

Sum of electronic and zero-point Energies (hartrees) = -592.730692

Cartesian Coordinates (Angstroms)

|   | X         | Y         | Z         |
|---|-----------|-----------|-----------|
| S | -1.489826 | -0.074872 | 0.264182  |
| C | -0.469983 | 1.298821  | -0.168050 |
| C | 0.829085  | 0.953184  | -0.495218 |
| C | 1.111913  | -0.519789 | -0.431321 |
| C | 1.757638  | -0.134227 | 0.846364  |
| C | -0.218887 | -1.277545 | -0.367314 |
| H | -0.857319 | 2.301836  | -0.040934 |
| H | 1.554420  | 1.657996  | -0.883596 |
| H | 1.784265  | -0.922152 | -1.192878 |
| H | 1.187328  | -0.112344 | 1.766259  |
| H | 2.814567  | 0.101166  | 0.877160  |
| H | -0.182009 | -2.139186 | 0.303823  |
| H | -0.522629 | -1.612028 | -1.363508 |

**Transition structure 9'g/10'g (NIMAG=1)**

Sum of electronic and zero-point Energies (hartrees)= -592.731784

Cartesian Coordinates (Angstroms)

|   | X         | Y         | Z         |
|---|-----------|-----------|-----------|
| S | 1.458804  | -0.070282 | 0.248949  |
| C | 0.354216  | -1.306411 | -0.293142 |
| C | -1.007926 | -1.026409 | -0.220124 |
| C | -1.075645 | 0.891874  | -0.374428 |
| C | -1.596055 | 0.006496  | 0.694466  |
| C | 0.319592  | 1.383488  | -0.273334 |
| H | 0.741236  | -2.119099 | -0.898719 |
| H | -1.698344 | -1.605995 | -0.829004 |
| H | -1.702885 | 1.175898  | -1.210768 |
| H | -1.110835 | 0.105970  | 1.668843  |
| H | -2.680806 | -0.048942 | 0.785699  |
| H | 0.455599  | 2.130803  | 0.517374  |
| H | 0.690085  | 1.791651  | -1.217244 |
